# Supplementary material for: Investigation for a multi-silique trait in Brassica napus by alternative splicing analysis
Source: PeerJ. 2020 Oct 8;8:e10135. doi: 10.7717/peerj.10135 (PMC7548069; doi:10.7717/peerj.10135)
Supplement: Supplemental Information 6 [file peerj-08-10135-s006.xlsx]

## Sheet: Table S5
Table S5. Comparison of AS events between six samples.
event_id	event_type	gene_id	event_start	event_end	strand	T01	T02	T03	T04	T05	T06
1000001	Alternative 5’ splice site	BnaC04g51720D	67	175	+	Yes	NO	NO	NO	NO	NO
1000002	Alternative 5’ splice site	BnaC04g51720D	70	175	+	NO	NO	Yes	NO	NO	NO
1000003	Alternative 5’ splice site	BnaC04g51720D	72	175	+	NO	NO	NO	NO	NO	Yes
1000004	Alternative 5’ splice site	BnaC04g51720D	80	175	+	NO	NO	NO	NO	Yes	NO
1000005	Alternative 5’ splice site	BnaC04g51720D	82	175	+	NO	Yes	NO	Yes	NO	NO
1000006	Alternative 5’ splice site	BnaA05g34190D	265	1060	+	NO	NO	NO	NO	NO	Yes
1000007	Alternative 5’ splice site	BnaA05g34190D	273	1060	+	NO	NO	NO	NO	Yes	NO
1000008	Alternative 5’ splice site	BnaA05g34190D	277	586	+	NO	NO	NO	Yes	NO	NO
1000009	Alternative 5’ splice site	BnaA05g34190D	303	586	+	NO	NO	Yes	NO	Yes	NO
1000010	Alternative 5’ splice site	BnaA05g34190D	310	586	+	Yes	NO	NO	NO	NO	NO
1000011	Alternative 3’ splice site	BnaC04g00010D	313	721	-	NO	NO	Yes	NO	NO	NO
1000012	Alternative 5’ splice site	BnaA05g34190D	314	586	+	NO	NO	NO	NO	NO	Yes
1000013	Alternative 5’ splice site	BnaA05g34190D	316	586	+	NO	Yes	NO	NO	NO	NO
1000014	Alternative 3’ splice site	BnaC04g00010D	321	948	-	Yes	Yes	Yes	Yes	Yes	Yes
1000015	Alternative 3’ splice site	BnaC04g00010D	441	721	-	Yes	NO	NO	NO	NO	NO
1000016	Alternative 3’ splice site	BnaC04g00010D	465	721	-	NO	NO	NO	Yes	NO	NO
1000017	Alternative 3’ splice site	BnaC04g00010D	468	721	-	NO	NO	NO	NO	NO	Yes
1000018	Alternative 3’ splice site	BnaC04g00010D	485	721	-	NO	Yes	NO	NO	NO	NO
1000019	Alternative 3’ splice site	BnaC04g00010D	538	721	-	NO	NO	NO	NO	Yes	NO
1000020	Alternative 3’ splice site	BnaA03g54770D	637	653	-	Yes	Yes	Yes	Yes	Yes	Yes
1000021	Alternative 5’ splice site	BnaA08g00010D	693	849	+	Yes	Yes	Yes	Yes	Yes	Yes
1000022	Alternative 5’ splice site	BnaA01g00010D	813	926	+	NO	Yes	Yes	NO	NO	NO
1000023	Alternative 5’ splice site	BnaA01g00010D	819	926	+	NO	NO	NO	Yes	Yes	NO
1000024	Alternative 5’ splice site	BnaA01g00010D	826	926	+	Yes	NO	NO	NO	NO	NO
1000025	Alternative 5’ splice site	BnaA01g00010D	831	926	+	NO	NO	NO	NO	NO	Yes
1000026	Intron rentition	BnaC04g51720D	854	940	+	NO	Yes	NO	NO	NO	NO
1000027	Intron rentition	BnaC04g51720D	854	940	+	NO	Yes	NO	NO	NO	NO
1000028	Alternative 3’ splice site	BnaC05g00010D	911	983	-	Yes	Yes	Yes	Yes	Yes	Yes
1000029	Alternative 3’ splice site	BnaC09g00010D	920	1039	-	NO	NO	NO	Yes	NO	NO
1000030	Alternative 3’ splice site	BnaC09g00010D	927	1039	-	Yes	NO	Yes	NO	NO	NO
1000031	Alternative 3’ splice site	BnaC09g00010D	930	1039	-	NO	Yes	NO	NO	Yes	Yes
1000032	Alternative 5’ splice site	BnaA09g51580D	1011	1419	+	Yes	Yes	Yes	Yes	Yes	Yes
1000033	Alternative 3’ splice site	BnaA01g00010D	1068	1493	+	NO	NO	Yes	NO	NO	NO
1000034	Alternative 3’ splice site	BnaA01g00010D	1068	1525	+	NO	NO	NO	NO	NO	Yes
1000035	Alternative 3’ splice site	BnaA01g00010D	1068	1490	+	Yes	NO	NO	NO	NO	NO
1000036	Alternative 3’ splice site	BnaA01g00010D	1068	1539	+	NO	NO	NO	Yes	NO	NO
1000037	Alternative 3’ splice site	BnaA01g00010D	1068	1536	+	NO	NO	NO	NO	Yes	NO
1000038	Alternative 3’ splice site	BnaA01g00010D	1068	1538	+	NO	Yes	NO	NO	NO	NO
1000039	Intron rentition	BnaC04g51720D	1103	1174	+	NO	NO	NO	NO	Yes	NO
1000040	Intron rentition	BnaC04g51720D	1103	1174	+	NO	NO	NO	NO	Yes	NO
1000041	Mutually exclusive exons	BnaA05g34190D	1139	1967	+	NO	NO	NO	NO	NO	Yes
1000042	Mutually exclusive exons	BnaA05g34190D	1139	1198	+	NO	NO	NO	NO	Yes	Yes
1000043	Mutually exclusive exons	BnaA05g34190D	1139	1511	+	NO	NO	NO	NO	Yes	NO
1000044	Intron rentition	BnaA05g34190D	1192	1271	+	NO	NO	NO	NO	Yes	NO
1000045	Intron rentition	BnaA05g34190D	1192	1271	+	NO	NO	NO	NO	Yes	NO
1000046	Intron rentition	BnaA05g34190D	1192	1610	+	NO	NO	NO	Yes	NO	Yes
1000047	Intron rentition	BnaA05g34190D	1192	1271	+	NO	Yes	NO	NO	NO	NO
1000048	Intron rentition	BnaA05g34190D	1192	1610	+	NO	NO	NO	Yes	NO	Yes
1000049	Intron rentition	BnaA05g34190D	1192	1271	+	NO	Yes	NO	NO	NO	NO
1000050	Intron rentition	BnaA05g34190D	1198	1610	+	NO	NO	NO	Yes	NO	NO
1000051	Intron rentition	BnaA05g34190D	1198	1271	+	NO	Yes	NO	NO	NO	NO
1000052	Intron rentition	BnaA05g34190D	1198	1271	+	NO	Yes	NO	NO	NO	NO
1000053	Intron rentition	BnaA05g34190D	1198	1271	+	NO	NO	NO	NO	Yes	NO
1000054	Intron rentition	BnaA05g34190D	1198	1610	+	NO	NO	NO	Yes	NO	NO
1000055	Intron rentition	BnaA05g34190D	1198	1271	+	NO	NO	NO	NO	Yes	NO
1000056	Intron rentition	BnaA05g34190D	1198	1271	+	NO	NO	NO	NO	NO	Yes
1000057	Intron rentition	BnaA05g34190D	1198	1271	+	NO	NO	NO	NO	NO	Yes
1000058	Intron rentition	BnaA05g34190D	1198	1271	+	NO	NO	NO	NO	NO	Yes
1000059	Intron rentition	BnaA05g34190D	1198	1271	+	NO	NO	NO	NO	NO	Yes
1000060	Intron rentition	BnaA05g34190D	1198	1271	+	NO	NO	NO	NO	Yes	NO
1000061	Intron rentition	BnaA05g34190D	1198	1271	+	NO	NO	NO	NO	Yes	NO
1000062	Mutually exclusive exons	BnaA05g34190D	1271	1515	+	NO	NO	Yes	NO	NO	Yes
1000063	Mutually exclusive exons	BnaA05g34190D	1271	1967	+	NO	NO	Yes	NO	NO	Yes
1000064	Alternative 5’ splice site	BnaC01g00010D	1282	1516	+	NO	NO	Yes	NO	NO	NO
1000065	Alternative 5’ splice site	BnaA09g00010D	1307	1393	+	Yes	Yes	Yes	Yes	Yes	Yes
1000066	Mutually exclusive exons	BnaC09g00010D	1323	1462	-	Yes	NO	Yes	Yes	NO	NO
1000067	Mutually exclusive exons	BnaC09g00010D	1353	1462	-	Yes	NO	Yes	Yes	NO	NO
1000068	Alternative 3’ splice site	BnaA08g00010D	1389	1889	+	Yes	Yes	Yes	Yes	Yes	Yes
1000069	Alternative 3’ splice site	BnaA09g51580D	1483	2984	+	Yes	Yes	Yes	Yes	Yes	Yes
1000070	Alternative 3’ splice site	BnaA01g00020D	1487	2124	-	Yes	Yes	Yes	Yes	Yes	Yes
1000071	Intron rentition	BnaA05g34190D	1511	1606	+	NO	NO	NO	NO	Yes	NO
1000072	Intron rentition	BnaA05g34190D	1511	1606	+	NO	NO	NO	NO	Yes	NO
1000073	Intron rentition	BnaA05g34190D	1515	1610	+	NO	NO	Yes	NO	Yes	Yes
1000074	Intron rentition	BnaA05g34190D	1515	1610	+	NO	NO	Yes	NO	NO	Yes
1000075	Intron rentition	BnaA05g34190D	1515	1610	+	NO	NO	NO	NO	Yes	NO
1000076	Alternative 3’ splice site	BnaA02g00010D	1535	1946	-	NO	NO	NO	NO	Yes	NO
1000077	Alternative 3’ splice site	BnaA02g00010D	1543	1946	-	Yes	Yes	Yes	Yes	NO	Yes
1000078	Alternative 3’ splice site	BnaA08g29150D	1551	1696	-	Yes	Yes	Yes	Yes	Yes	Yes
1000079	Alternative 5’ splice site	BnaC02g00010D	1576	1705	+	Yes	Yes	Yes	Yes	Yes	Yes
1000080	Alternative 3’ splice site	BnaC01g00010D	1579	2057	+	NO	NO	Yes	NO	NO	NO
1000081	Alternative 3’ splice site	BnaC03g71140D	1585	1932	-	Yes	Yes	Yes	Yes	Yes	Yes
1000082	Alternative 3’ splice site	BnaA05g34190D	1606	2075	+	NO	Yes	NO	NO	NO	NO
1000083	Alternative 3’ splice site	BnaA05g34190D	1610	2075	+	Yes	Yes	Yes	Yes	NO	NO
1000084	Alternative 5’ splice site	BnaA03g54770D	1645	1773	-	Yes	NO	Yes	Yes	Yes	Yes
1000085	Intron rentition	BnaC04g51720D	1649	1739	+	Yes	Yes	Yes	Yes	Yes	Yes
1000086	Intron rentition	BnaC04g51720D	1649	1739	+	Yes	Yes	Yes	Yes	Yes	Yes
1000087	Alternative 3’ splice site	BnaUnng00090D	1677	2455	-	NO	NO	Yes	NO	NO	NO
1000088	Mutually exclusive exons	BnaA09g00010D	1754	2252	+	NO	NO	Yes	NO	NO	NO
1000089	Mutually exclusive exons	BnaA09g00010D	1754	1893	+	NO	NO	Yes	NO	NO	NO
1000090	Alternative 3’ splice site	BnaUnng00090D	1762	2455	-	NO	NO	NO	Yes	NO	NO
1000091	Alternative 5’ splice site	BnaC09g00010D	1829	2165	-	Yes	Yes	Yes	Yes	Yes	Yes
1000092	Alternative 5’ splice site	BnaA06g00010D	1868	1973	+	NO	Yes	NO	NO	NO	NO
1000093	Alternative 5’ splice site	BnaA06g00010D	1874	1973	+	Yes	NO	Yes	Yes	Yes	Yes
1000094	Alternative 5’ splice site	BnaA06g00010D	1874	2003	+	NO	Yes	NO	NO	NO	NO
1000095	Alternative 5’ splice site	BnaA06g00010D	1874	2377	+	Yes	Yes	Yes	Yes	Yes	Yes
1000096	Intron rentition	BnaA09g00010D	1893	1970	+	NO	NO	Yes	NO	NO	NO
1000097	Intron rentition	BnaA09g00010D	1893	1970	+	NO	NO	Yes	NO	NO	NO
1000098	Intron rentition	BnaA09g00010D	1893	1970	+	NO	NO	Yes	NO	NO	NO
1000099	Intron rentition	BnaA09g00010D	1893	1970	+	NO	NO	Yes	NO	NO	NO
1000100	Alternative 5’ splice site	BnaA08g29150D	1963	2218	-	Yes	Yes	Yes	Yes	Yes	Yes
1000101	Alternative 3’ splice site	BnaA09g00010D	1970	3007	+	NO	NO	Yes	NO	NO	NO
1000102	Alternative 5’ splice site	BnaC05g00010D	2028	2200	-	Yes	Yes	Yes	Yes	Yes	Yes
1000103	Alternative 3’ splice site	BnaA05g34190D	2053	2075	+	NO	NO	NO	NO	NO	Yes
1000104	Alternative 5’ splice site	BnaA03g54770D	2168	2192	-	NO	Yes	NO	NO	NO	NO
1000105	Alternative 3’ splice site	BnaA05g34190D	2211	2423	+	NO	NO	Yes	NO	NO	NO
1000106	Alternative 3’ splice site	BnaA05g34190D	2211	2450	+	NO	NO	NO	Yes	NO	NO
1000107	Alternative 3’ splice site	BnaA05g34190D	2211	2419	+	NO	NO	NO	NO	Yes	NO
1000108	Alternative 3’ splice site	BnaA05g34190D	2211	2418	+	NO	Yes	NO	NO	NO	NO
1000109	Intron rentition	BnaA09g00010D	2252	2359	+	NO	NO	NO	Yes	Yes	NO
1000110	Intron rentition	BnaA09g00010D	2252	2359	+	NO	NO	NO	Yes	Yes	NO
1000111	Alternative 5’ splice site	BnaA01g00020D	2256	2436	-	Yes	Yes	Yes	Yes	Yes	Yes
1000112	Alternative 5’ splice site	BnaC05g00020D	2286	2399	+	Yes	Yes	Yes	Yes	Yes	Yes
1000113	Alternative 3’ splice site	BnaA03g00020D	2351	2758	-	NO	NO	NO	Yes	NO	NO
1000114	Alternative 3’ splice site	BnaA03g00020D	2361	2758	-	NO	NO	NO	NO	Yes	NO
1000115	Alternative 3’ splice site	BnaA03g00020D	2366	2758	-	NO	Yes	NO	NO	NO	NO
1000116	Alternative 3’ splice site	BnaA03g00020D	2439	2758	-	Yes	NO	NO	NO	NO	NO
1000117	Alternative 5’ splice site	BnaC05g48960D	2458	2715	+	Yes	Yes	Yes	Yes	Yes	Yes
1000118	Alternative 3’ splice site	BnaC05g00020D	2469	2486	+	Yes	Yes	Yes	Yes	Yes	Yes
1000119	Alternative 5’ splice site	BnaA02g00010D	2543	2608	-	NO	NO	Yes	NO	NO	NO
1000120	Alternative 5’ splice site	BnaA02g00010D	2543	2629	-	NO	Yes	NO	NO	NO	NO
1000121	Alternative 5’ splice site	BnaA02g00010D	2543	2598	-	NO	NO	NO	NO	Yes	NO
1000122	Alternative 5’ splice site	BnaA02g00010D	2543	2601	-	NO	NO	NO	NO	NO	Yes
1000123	Alternative 5’ splice site	BnaA02g00010D	2543	2625	-	NO	NO	NO	Yes	NO	NO
1000124	Alternative 5’ splice site	BnaA02g00010D	2543	2582	-	Yes	NO	NO	NO	NO	NO
1000125	Alternative 3’ splice site	BnaA09g00010D	2602	3007	+	NO	NO	Yes	NO	NO	NO
1000126	Alternative 3’ splice site	BnaA01g00030D	2653	3177	-	Yes	NO	Yes	NO	NO	Yes
1000127	Alternative 3’ splice site	BnaA01g00030D	2663	3177	-	NO	Yes	NO	NO	NO	NO
1000128	Alternative 3’ splice site	BnaA01g00030D	2665	3177	-	NO	NO	NO	Yes	Yes	NO
1000129	Alternative 3’ splice site	BnaA09g00010D	2694	2998	+	Yes	Yes	NO	Yes	Yes	Yes
1000130	Alternative 3’ splice site	BnaA03g00020D	2705	2758	-	NO	NO	Yes	NO	NO	Yes
1000131	Mutually exclusive exons	BnaA03g00020D	2857	3029	-	NO	NO	NO	NO	Yes	NO
1000132	Mutually exclusive exons	BnaA03g00020D	2874	3029	-	NO	NO	NO	NO	Yes	NO
1000133	Alternative 5’ splice site	BnaA08g00020D	2881	3435	+	Yes	Yes	Yes	Yes	Yes	Yes
1000134	Alternative 3’ splice site	BnaUnng00090D	3004	3018	-	Yes	NO	NO	NO	NO	NO
1000135	Intron rentition	BnaA03g00020D	3029	3252	-	Yes	Yes	NO	Yes	NO	NO
1000136	Intron rentition	BnaA03g00020D	3029	3252	-	Yes	Yes	NO	Yes	NO	NO
1000137	Alternative 3’ splice site	BnaC04g51720D	3156	3208	+	NO	NO	NO	Yes	NO	NO
1000138	Alternative 3’ splice site	BnaC04g51720D	3156	3206	+	NO	Yes	Yes	NO	Yes	NO
1000139	Alternative 3’ splice site	BnaC04g51720D	3156	3207	+	Yes	NO	NO	NO	NO	Yes
1000140	Alternative 5’ splice site	BnaC04g00020D	3156	3579	+	NO	NO	NO	NO	Yes	NO
1000141	Alternative 3’ splice site	BnaUnng00090D	3220	4228	-	NO	Yes	NO	NO	NO	NO
1000142	Alternative 3’ splice site	BnaUnng00090D	3222	4228	-	NO	NO	NO	NO	NO	Yes
1000143	Alternative 5’ splice site	BnaA02g34940D	3367	3777	+	NO	NO	NO	Yes	NO	NO
1000144	Alternative 5’ splice site	BnaA02g34940D	3379	3777	+	NO	NO	Yes	NO	NO	NO
1000145	Alternative 5’ splice site	BnaA02g34940D	3402	3777	+	NO	NO	NO	NO	Yes	NO
1000146	Alternative 5’ splice site	BnaA02g34940D	3405	3777	+	Yes	NO	NO	NO	NO	NO
1000147	Alternative 5’ splice site	BnaC04g00010D	3426	3544	-	Yes	Yes	Yes	NO	Yes	Yes
1000148	Alternative 5’ splice site	BnaC04g00010D	3426	3800	-	NO	NO	NO	Yes	NO	NO
1000149	Alternative 5’ splice site	BnaA02g34940D	3519	3777	+	NO	Yes	NO	NO	NO	Yes
1000150	Alternative 5’ splice site	BnaC04g00020D	3534	3579	+	NO	NO	Yes	NO	NO	NO
1000151	Alternative 5’ splice site	BnaC04g00020D	3536	3694	+	NO	NO	NO	Yes	NO	NO
1000152	Alternative 5’ splice site	BnaC04g00020D	3559	3694	+	Yes	NO	NO	NO	NO	NO
1000153	Alternative 3’ splice site	BnaA01g34490D	3591	3873	-	Yes	Yes	Yes	Yes	Yes	Yes
1000154	Alternative 5’ splice site	BnaC04g00020D	3643	3694	+	NO	Yes	NO	NO	NO	NO
1000155	Intron rentition	BnaA01g00030D	3665	3760	-	NO	NO	NO	Yes	Yes	NO
1000156	Intron rentition	BnaA01g00030D	3665	3764	-	NO	NO	NO	Yes	Yes	NO
1000157	Intron rentition	BnaA01g00030D	3665	3760	-	NO	NO	NO	Yes	Yes	NO
1000158	Intron rentition	BnaA01g00030D	3665	3764	-	NO	NO	NO	Yes	Yes	NO
1000159	Cassette exon	BnaA01g00030D	3712	3743	-	Yes	Yes	Yes	Yes	Yes	Yes
1000160	Cassette exon	BnaA01g00030D	3712	3743	-	Yes	Yes	Yes	Yes	Yes	Yes
1000161	Alternative 5’ splice site	BnaA06g37420D	3735	4219	+	NO	NO	NO	NO	NO	Yes
1000162	Alternative 5’ splice site	BnaA06g37420D	3747	4219	+	NO	Yes	NO	Yes	NO	NO
1000163	Alternative 5’ splice site	BnaA06g37420D	3758	4219	+	NO	NO	NO	NO	Yes	NO
1000164	Alternative 5’ splice site	BnaA06g37420D	3777	4219	+	NO	NO	Yes	NO	NO	NO
1000165	Alternative 5’ splice site	BnaA06g37420D	3799	3969	+	Yes	Yes	Yes	Yes	Yes	Yes
1000166	Alternative 5’ splice site	BnaC04g00020D	3800	3885	+	NO	NO	NO	NO	NO	Yes
1000167	Alternative 5’ splice site	BnaC04g00020D	3800	4096	+	Yes	Yes	NO	NO	Yes	Yes
1000168	Alternative 5’ splice site	BnaA03g00020D	3801	3903	-	Yes	Yes	Yes	Yes	Yes	Yes
1000169	Alternative 3’ splice site	BnaCnng00010D	3817	4114	-	Yes	Yes	Yes	Yes	Yes	Yes
1000170	Alternative 3’ splice site	BnaA08g00020D	3892	4145	+	Yes	Yes	Yes	Yes	Yes	Yes
1000171	Alternative 3’ splice site	BnaA05g00010D	3940	4091	-	Yes	Yes	Yes	Yes	Yes	Yes
1000172	Alternative 5’ splice site	BnaC03g71140D	3969	4006	-	Yes	Yes	Yes	Yes	Yes	Yes
1000173	Intron rentition	BnaA02g34940D	3995	4071	+	Yes	NO	NO	NO	NO	NO
1000174	Intron rentition	BnaA02g34940D	3995	4068	+	Yes	NO	NO	NO	NO	NO
1000175	Intron rentition	BnaA02g34940D	3995	4071	+	Yes	NO	NO	NO	NO	NO
1000176	Intron rentition	BnaA02g34940D	3995	4068	+	Yes	NO	NO	NO	NO	NO
1000177	Alternative 5’ splice site	BnaA04g27230D	4045	4470	+	Yes	Yes	Yes	Yes	Yes	Yes
1000178	Intron rentition	BnaA01g34490D	4061	4139	-	NO	NO	NO	NO	NO	Yes
1000179	Intron rentition	BnaA01g34490D	4061	4139	-	NO	NO	NO	NO	NO	Yes
1000180	Alternative 5’ splice site	BnaC09g00020D	4092	4110	+	Yes	NO	NO	Yes	NO	Yes
1000181	Alternative 5’ splice site	BnaC09g00020D	4093	4110	+	NO	Yes	NO	NO	Yes	NO
1000182	Intron rentition	BnaC04g00020D	4096	4211	+	Yes	NO	NO	NO	NO	NO
1000183	Intron rentition	BnaC04g00020D	4096	4211	+	Yes	NO	NO	NO	NO	NO
1000184	Intron rentition	BnaC04g00020D	4096	4211	+	Yes	NO	NO	NO	NO	NO
1000185	Intron rentition	BnaC04g00020D	4096	4211	+	Yes	NO	NO	NO	NO	NO
1000186	Alternative 5’ splice site	BnaC09g00020D	4099	4110	+	NO	NO	Yes	NO	NO	NO
1000187	Alternative 5’ splice site	BnaC04g00020D	4110	4294	+	NO	Yes	NO	NO	NO	NO
1000188	Alternative 5’ splice site	BnaC09g00020D	4145	4146	+	NO	NO	NO	NO	NO	Yes
1000189	Intron rentition	BnaC05g48960D	4167	4252	+	Yes	NO	NO	NO	NO	Yes
1000190	Intron rentition	BnaC05g48960D	4167	4252	+	Yes	NO	NO	NO	NO	Yes
1000191	Alternative 3’ splice site	BnaA06g00010D	4238	4497	+	NO	NO	NO	NO	NO	Yes
1000192	Alternative 3’ splice site	BnaA06g00010D	4238	4626	+	Yes	NO	NO	NO	NO	NO
1000193	Alternative 3’ splice site	BnaA06g00010D	4238	4654	+	NO	NO	NO	Yes	Yes	NO
1000194	Alternative 3’ splice site	BnaA06g00010D	4238	4839	+	NO	Yes	NO	NO	NO	NO
1000195	Alternative 3’ splice site	BnaA06g00010D	4238	4548	+	NO	NO	Yes	NO	NO	NO
1000196	Alternative 5’ splice site	BnaCnng00010D	4333	4699	-	NO	NO	Yes	NO	NO	NO
1000197	Alternative 5’ splice site	BnaCnng00010D	4333	4701	-	NO	NO	NO	Yes	NO	Yes
1000198	Alternative 5’ splice site	BnaCnng00010D	4333	4695	-	Yes	NO	NO	NO	NO	NO
1000199	Alternative 5’ splice site	BnaCnng00010D	4333	4708	-	NO	Yes	NO	NO	NO	NO
1000200	Alternative 5’ splice site	BnaCnng00010D	4333	4691	-	NO	NO	NO	NO	Yes	NO
1000201	Alternative 3’ splice site	BnaC04g51730D	4354	4552	-	Yes	NO	NO	NO	NO	NO
1000202	Alternative 3’ splice site	BnaC04g51730D	4366	4552	-	NO	NO	Yes	NO	NO	NO
1000203	Alternative 3’ splice site	BnaC04g51730D	4371	4552	-	NO	NO	NO	NO	Yes	NO
1000204	Mutually exclusive exons	BnaA02g34940D	4379	4413	+	Yes	NO	Yes	Yes	Yes	NO
1000205	Mutually exclusive exons	BnaA02g34940D	4379	4440	+	Yes	NO	Yes	Yes	Yes	NO
1000206	Alternative 5’ splice site	BnaCnng00010D	4396	4651	-	Yes	Yes	Yes	Yes	Yes	Yes
1000207	Alternative 3’ splice site	BnaC04g51730D	4514	4552	-	NO	Yes	NO	NO	NO	NO
1000208	Alternative 3’ splice site	BnaC02g00010D	4519	4584	+	Yes	Yes	Yes	Yes	Yes	Yes
1000209	Alternative 3’ splice site	BnaC04g51730D	4520	4552	-	NO	NO	NO	Yes	NO	Yes
1000210	Alternative 3’ splice site	BnaA04g27230D	4540	5973	+	Yes	Yes	Yes	Yes	Yes	Yes
1000211	Intron rentition	BnaC05g48960D	4624	4759	+	NO	NO	NO	NO	Yes	NO
1000212	Intron rentition	BnaC05g48960D	4624	4759	+	NO	NO	NO	NO	Yes	NO
1000213	Alternative 3’ splice site	BnaA06g37420D	4740	4836	+	Yes	NO	NO	NO	NO	NO
1000214	Alternative 3’ splice site	BnaA06g37420D	4740	4985	+	NO	NO	NO	NO	NO	Yes
1000215	Alternative 3’ splice site	BnaA06g37420D	4740	4815	+	NO	Yes	Yes	Yes	Yes	NO
1000216	Alternative 5’ splice site	BnaC03g00010D	4802	6170	+	NO	NO	Yes	NO	NO	NO
1000217	Alternative 5’ splice site	BnaC03g00010D	4802	6519	+	NO	NO	Yes	NO	NO	NO
1000218	Alternative 3’ splice site	BnaC04g00020D	4824	5459	+	Yes	NO	Yes	NO	NO	NO
1000219	Alternative 3’ splice site	BnaC04g00020D	4824	5453	+	NO	NO	NO	NO	Yes	NO
1000220	Alternative 3’ splice site	BnaC04g00020D	4824	5298	+	NO	Yes	NO	NO	NO	NO
1000221	Alternative 3’ splice site	BnaC04g00020D	4824	5463	+	NO	NO	NO	Yes	NO	NO
1000222	Alternative 5’ splice site	BnaA10g27730D	4833	4962	+	NO	NO	NO	NO	Yes	NO
1000223	Alternative 3’ splice site	BnaC04g00020D	4839	5383	+	NO	NO	NO	NO	NO	Yes
1000224	Alternative 5’ splice site	BnaA10g27730D	4845	4962	+	Yes	NO	NO	NO	NO	NO
1000225	Alternative 5’ splice site	BnaA10g27730D	4849	4962	+	NO	NO	NO	NO	NO	Yes
1000226	Alternative 5’ splice site	BnaA10g27730D	4850	4962	+	NO	Yes	Yes	NO	NO	NO
1000227	Alternative 5’ splice site	BnaA10g27730D	4857	5170	+	NO	NO	NO	NO	Yes	NO
1000228	Alternative 5’ splice site	BnaA10g27730D	4872	4962	+	NO	NO	NO	Yes	NO	NO
1000229	Alternative 3’ splice site	BnaC05g48960D	4914	5050	+	Yes	Yes	Yes	Yes	Yes	Yes
1000230	Mutually exclusive exons	BnaA01g34490D	4960	5072	-	NO	Yes	Yes	Yes	Yes	Yes
1000231	Mutually exclusive exons	BnaA01g34490D	4960	5044	-	NO	Yes	Yes	Yes	Yes	Yes
1000232	Alternative 5’ splice site	BnaA01g00030D	4967	5538	-	NO	NO	NO	Yes	NO	NO
1000233	Alternative 5’ splice site	BnaA01g00030D	4967	5455	-	Yes	Yes	Yes	NO	NO	Yes
1000234	Alternative 5’ splice site	BnaA01g00030D	4967	5517	-	NO	NO	NO	NO	Yes	NO
1000235	Alternative 5’ splice site	BnaC03g00010D	4988	6056	+	NO	NO	NO	Yes	NO	NO
1000236	Alternative 5’ splice site	BnaC03g00010D	5040	6477	+	NO	Yes	NO	NO	NO	NO
1000237	Alternative 5’ splice site	BnaC03g00010D	5040	6520	+	NO	Yes	NO	NO	NO	NO
1000238	Alternative 5’ splice site	BnaC03g00010D	5040	6170	+	NO	Yes	NO	NO	NO	NO
1000239	Alternative 5’ splice site	BnaC03g00010D	5046	5429	+	NO	NO	NO	NO	Yes	NO
1000240	Alternative 5’ splice site	BnaA05g00010D	5078	5148	-	Yes	Yes	Yes	Yes	Yes	Yes
1000241	Alternative 5’ splice site	BnaA07g35940D	5099	5391	+	Yes	Yes	Yes	Yes	Yes	Yes
1000242	Alternative 5’ splice site	BnaC03g00010D	5130	5429	+	NO	NO	NO	NO	NO	Yes
1000243	Alternative 5’ splice site	BnaA01g34490D	5139	5162	-	NO	NO	NO	NO	NO	Yes
1000244	Mutually exclusive exons	BnaA10g27730D	5255	5756	+	NO	Yes	NO	NO	NO	NO
1000245	Alternative 5’ splice site	BnaA06g00020D	5287	5359	+	Yes	Yes	Yes	Yes	Yes	Yes
1000246	Mutually exclusive exons	BnaA10g27730D	5298	5756	+	NO	Yes	NO	NO	NO	NO
1000247	Alternative 5’ splice site	BnaA03g54780D	5298	5587	+	NO	Yes	NO	NO	NO	NO
1000248	Alternative 5’ splice site	BnaA03g54780D	5302	5587	+	NO	NO	NO	NO	NO	Yes
1000249	Alternative 5’ splice site	BnaA03g54780D	5338	5587	+	Yes	NO	Yes	NO	NO	NO
1000250	Alternative 5’ splice site	BnaC02g00020D	5398	5623	+	Yes	Yes	Yes	Yes	Yes	Yes
1000251	Alternative 5’ splice site	BnaA03g54780D	5405	5587	+	NO	NO	NO	Yes	Yes	NO
1000252	Alternative 3’ splice site	BnaC03g71150D	5496	5888	-	NO	NO	NO	Yes	NO	NO
1000253	Alternative 3’ splice site	BnaC03g71150D	5498	5888	-	NO	NO	Yes	NO	NO	NO
1000254	Alternative 5’ splice site	BnaC01g00020D	5556	5578	+	Yes	Yes	Yes	Yes	Yes	Yes
1000255	Alternative 5’ splice site	BnaC04g51730D	5560	5625	-	Yes	Yes	Yes	Yes	Yes	Yes
1000256	Alternative 3’ splice site	BnaC03g71150D	5567	5888	-	Yes	NO	NO	NO	NO	NO
1000257	Alternative 3’ splice site	BnaC03g71150D	5571	5888	-	NO	NO	NO	NO	Yes	NO
1000258	Alternative 5’ splice site	BnaC03g00010D	5584	6170	+	Yes	NO	NO	NO	NO	NO
1000259	Alternative 5’ splice site	BnaC03g00010D	5602	6170	+	NO	NO	NO	NO	Yes	NO
1000260	Alternative 5’ splice site	BnaC03g00010D	5612	6056	+	Yes	Yes	Yes	NO	Yes	NO
1000261	Alternative 3’ splice site	BnaC01g00020D	5620	5665	+	Yes	Yes	Yes	Yes	Yes	Yes
1000262	Alternative 3’ splice site	BnaC03g71150D	5628	5888	-	NO	Yes	NO	NO	NO	NO
1000263	Alternative 3’ splice site	BnaC03g71150D	5651	5888	-	NO	NO	NO	NO	NO	Yes
1000264	Alternative 3’ splice site	BnaA06g00020D	5660	5705	+	Yes	Yes	Yes	Yes	Yes	Yes
1000265	Alternative 5’ splice site	BnaA03g00040D	5725	5981	+	NO	NO	NO	NO	NO	Yes
1000266	Alternative 5’ splice site	BnaA03g00040D	5731	5981	+	Yes	Yes	NO	NO	Yes	NO
1000267	Alternative 5’ splice site	BnaA03g00040D	5734	5981	+	NO	NO	Yes	NO	NO	NO
1000268	Alternative 5’ splice site	BnaA03g00040D	5740	5981	+	NO	NO	NO	Yes	NO	NO
1000269	Intron rentition	BnaA03g54780D	5874	5951	+	Yes	Yes	NO	NO	NO	Yes
1000270	Intron rentition	BnaA03g54780D	5874	5951	+	Yes	Yes	NO	NO	NO	Yes
1000271	Intron rentition	BnaA10g27730D	5972	6048	+	NO	NO	NO	NO	NO	Yes
1000272	Intron rentition	BnaA10g27730D	5972	6089	+	NO	NO	NO	NO	NO	Yes
1000273	Intron rentition	BnaA10g27730D	5972	6089	+	NO	NO	NO	NO	NO	Yes
1000274	Intron rentition	BnaA10g27730D	5972	6048	+	NO	NO	NO	NO	NO	Yes
1000275	Mutually exclusive exons	BnaA10g27730D	6044	6323	+	Yes	NO	NO	NO	NO	NO
1000276	Mutually exclusive exons	BnaA10g27730D	6044	6459	+	NO	NO	NO	Yes	NO	NO
1000277	Mutually exclusive exons	BnaA10g27730D	6044	6459	+	NO	Yes	Yes	Yes	Yes	NO
1000278	Mutually exclusive exons	BnaA10g27730D	6044	6323	+	Yes	NO	NO	NO	NO	NO
1000279	Mutually exclusive exons	BnaA10g27730D	6048	6459	+	NO	NO	Yes	NO	Yes	Yes
1000280	Intron rentition	BnaC03g00010D	6056	6130	+	NO	NO	NO	NO	Yes	Yes
1000281	Intron rentition	BnaC03g00010D	6056	6130	+	NO	NO	NO	NO	Yes	NO
1000282	Intron rentition	BnaC03g00010D	6056	6130	+	NO	NO	NO	NO	NO	Yes
1000283	Mutually exclusive exons	BnaA10g27730D	6089	6323	+	Yes	Yes	Yes	Yes	Yes	Yes
1000284	Mutually exclusive exons	BnaA10g27730D	6089	6323	+	Yes	NO	NO	NO	NO	NO
1000285	Mutually exclusive exons	BnaA10g27730D	6089	6459	+	NO	NO	NO	Yes	NO	NO
1000286	Mutually exclusive exons	BnaA10g27730D	6089	6459	+	Yes	NO	NO	Yes	NO	NO
1000287	Intron rentition	BnaA03g00040D	6196	6286	+	NO	NO	NO	NO	NO	Yes
1000288	Intron rentition	BnaA03g00040D	6196	6286	+	NO	NO	NO	NO	NO	Yes
1000289	Alternative 5’ splice site	BnaA01g34490D	6251	6440	-	Yes	Yes	Yes	Yes	Yes	Yes
1000290	Cassette exon	BnaC03g00010D	6281	6477	+	NO	Yes	NO	NO	NO	NO
1000291	Cassette exon	BnaC03g00010D	6281	6477	+	NO	NO	NO	NO	Yes	NO
1000292	Cassette exon	BnaC03g00010D	6281	6477	+	NO	Yes	NO	NO	NO	NO
1000293	Cassette exon	BnaC03g00010D	6281	6477	+	NO	NO	NO	NO	Yes	NO
1000294	Alternative 3’ splice site	BnaC02g00020D	6312	6613	+	Yes	Yes	Yes	Yes	Yes	Yes
1000295	Alternative 3’ splice site	BnaA03g54780D	6515	6719	+	NO	NO	NO	Yes	Yes	NO
1000296	Mutually exclusive exons	BnaA10g27730D	6538	6690	+	NO	NO	NO	Yes	NO	NO
1000297	Alternative 3’ splice site	BnaC08g00020D	6543	6658	-	Yes	Yes	Yes	Yes	Yes	Yes
1000298	Intron rentition	BnaA03g54780D	6567	6634	+	NO	NO	NO	NO	NO	Yes
1000299	Intron rentition	BnaA03g54780D	6567	6634	+	NO	NO	NO	NO	NO	Yes
1000300	Alternative 3’ splice site	BnaC03g00010D	6600	6683	+	Yes	NO	NO	NO	NO	NO
1000301	Alternative 3’ splice site	BnaC03g00010D	6600	6779	+	NO	NO	Yes	NO	Yes	NO
1000302	Alternative 3’ splice site	BnaC03g00010D	6605	6959	+	NO	Yes	NO	NO	NO	NO
1000303	Alternative 3’ splice site	BnaC03g00010D	6605	6683	+	NO	NO	NO	NO	NO	Yes
1000304	Mutually exclusive exons	BnaA10g27730D	6614	6690	+	NO	NO	NO	Yes	NO	NO
1000305	Alternative 3’ splice site	BnaA03g54780D	6634	6905	+	NO	NO	NO	NO	NO	Yes
1000306	Intron rentition	BnaA10g27730D	6690	6878	+	Yes	NO	NO	NO	NO	NO
1000307	Intron rentition	BnaA10g27730D	6690	6878	+	NO	NO	Yes	NO	NO	NO
1000308	Intron rentition	BnaA10g27730D	6690	6878	+	Yes	NO	NO	NO	NO	NO
1000309	Intron rentition	BnaA10g27730D	6690	7730	+	NO	NO	NO	Yes	NO	NO
1000310	Intron rentition	BnaA10g27730D	6690	7730	+	Yes	Yes	NO	Yes	Yes	Yes
1000311	Intron rentition	BnaA10g27730D	6690	7730	+	NO	NO	NO	Yes	NO	NO
1000312	Intron rentition	BnaA10g27730D	6690	6878	+	NO	NO	Yes	NO	NO	NO
1000313	Intron rentition	BnaA10g27730D	6690	7730	+	Yes	Yes	NO	Yes	Yes	Yes
1000314	Alternative 5’ splice site	BnaA03g54790D	6776	6795	+	NO	NO	NO	Yes	Yes	NO
1000315	Alternative 5’ splice site	BnaA09g51600D	6855	6911	+	Yes	NO	NO	NO	NO	NO
1000316	Alternative 3’ splice site	BnaA10g27730D	6878	7882	+	Yes	NO	NO	NO	NO	NO
1000317	Alternative 5’ splice site	BnaC08g00020D	6915	7005	-	Yes	Yes	Yes	Yes	Yes	Yes
1000318	Mutually exclusive exons	BnaC09g00020D	7031	7151	+	NO	NO	NO	Yes	NO	NO
1000319	Mutually exclusive exons	BnaC09g00020D	7031	7119	+	NO	NO	NO	Yes	NO	NO
1000320	Alternative 5’ splice site	BnaA06g37430D	7038	7069	+	Yes	Yes	Yes	Yes	Yes	Yes
1000321	Alternative 3’ splice site	BnaA05g00020D	7080	7316	-	Yes	Yes	Yes	Yes	Yes	Yes
1000322	Alternative 5’ splice site	BnaC07g47730D	7097	7202	+	Yes	Yes	Yes	Yes	Yes	Yes
1000323	Alternative 3’ splice site	BnaC04g00040D	7112	7616	-	Yes	Yes	Yes	Yes	Yes	Yes
1000324	Alternative 5’ splice site	BnaC03g00020D	7129	7863	+	NO	Yes	NO	NO	NO	NO
1000325	Alternative 3’ splice site	BnaA02g34940D	7160	7234	+	Yes	Yes	Yes	Yes	Yes	Yes
1000326	Alternative 5’ splice site	BnaA09g51600D	7211	7340	+	NO	Yes	Yes	Yes	Yes	Yes
1000327	Alternative 5’ splice site	BnaC02g00030D	7217	7274	+	Yes	Yes	Yes	Yes	Yes	Yes
1000328	Alternative 5’ splice site	BnaC03g00020D	7224	7589	+	NO	NO	NO	NO	NO	Yes
1000329	Alternative 3’ splice site	BnaC08g00030D	7237	7355	-	Yes	Yes	Yes	Yes	Yes	Yes
1000330	Alternative 3’ splice site	BnaC07g47730D	7385	8310	+	Yes	Yes	Yes	Yes	Yes	Yes
1000331	Alternative 3’ splice site	BnaC01g00040D	7432	7530	-	Yes	Yes	Yes	Yes	Yes	Yes
1000332	Alternative 5’ splice site	BnaC03g00020D	7439	7863	+	NO	NO	Yes	NO	NO	NO
1000333	Alternative 5’ splice site	BnaC08g00030D	7459	7540	-	Yes	Yes	Yes	Yes	Yes	Yes
1000334	Alternative 5’ splice site	BnaC03g00020D	7526	7863	+	NO	NO	NO	NO	Yes	NO
1000335	Alternative 3’ splice site	BnaA02g34950D	7583	8122	-	NO	NO	NO	NO	Yes	NO
1000336	Alternative 3’ splice site	BnaA09g51600D	7600	7664	+	Yes	NO	NO	NO	NO	NO
1000337	Alternative 3’ splice site	BnaA09g51600D	7600	7680	+	NO	Yes	Yes	Yes	Yes	Yes
1000338	Alternative 3’ splice site	BnaA02g34950D	7608	8122	-	NO	Yes	NO	NO	NO	NO
1000339	Alternative 3’ splice site	BnaA02g34950D	7656	8122	-	NO	NO	NO	NO	NO	Yes
1000340	Alternative 5’ splice site	BnaC03g00020D	7660	7863	+	Yes	NO	NO	NO	NO	NO
1000341	Alternative 3’ splice site	BnaA02g34950D	7664	8122	-	Yes	NO	NO	NO	NO	NO
1000342	Alternative 3’ splice site	BnaA03g54780D	7692	7926	+	NO	NO	NO	NO	NO	Yes
1000343	Alternative 3’ splice site	BnaA03g54790D	7692	7799	+	NO	NO	NO	Yes	Yes	NO
1000344	Alternative 3’ splice site	BnaA03g54780D	7692	7952	+	Yes	NO	NO	NO	NO	NO
1000345	Alternative 3’ splice site	BnaA03g54780D	7692	7985	+	NO	Yes	NO	NO	NO	NO
1000346	Alternative 3’ splice site	BnaA03g54780D	7692	7958	+	NO	NO	Yes	NO	NO	NO
1000347	Alternative 3’ splice site	BnaA02g34950D	7703	8122	-	NO	NO	NO	Yes	NO	NO
1000348	Alternative 5’ splice site	BnaC03g00020D	7837	7863	+	NO	NO	NO	Yes	NO	NO
1000349	Mutually exclusive exons	BnaA03g00040D	7850	7912	+	NO	NO	Yes	NO	NO	NO
1000350	Alternative 3’ splice site	BnaA05g34200D	7865	8263	-	Yes	Yes	Yes	Yes	Yes	Yes
1000351	Mutually exclusive exons	BnaA03g00040D	7888	7912	+	NO	NO	Yes	NO	NO	NO
1000352	Alternative 3’ splice site	BnaA02g34950D	7907	8122	-	NO	NO	Yes	NO	NO	NO
1000353	Alternative 3’ splice site	BnaA10g27730D	7974	8656	+	NO	NO	Yes	NO	NO	NO
1000354	Alternative 3’ splice site	BnaA10g27730D	7974	8220	+	Yes	Yes	NO	Yes	Yes	Yes
1000355	Alternative 3’ splice site	BnaC09g00020D	8290	8397	+	NO	NO	NO	Yes	NO	NO
1000356	Alternative 3’ splice site	BnaC09g00020D	8290	8391	+	Yes	Yes	NO	NO	NO	Yes
1000357	Alternative 3’ splice site	BnaC09g00020D	8290	8392	+	NO	NO	Yes	NO	NO	NO
1000358	Alternative 3’ splice site	BnaC09g00020D	8290	8393	+	NO	NO	NO	NO	Yes	NO
1000359	Alternative 5’ splice site	BnaC04g00040D	8333	8949	-	Yes	Yes	Yes	Yes	Yes	Yes
1000360	Alternative 3’ splice site	BnaA03g54800D	8346	9127	-	Yes	Yes	Yes	Yes	Yes	Yes
1000361	Alternative 5’ splice site	BnaA01g00040D	8421	9420	+	Yes	Yes	Yes	Yes	Yes	Yes
1000362	Alternative 5’ splice site	BnaA05g34200D	8439	8636	-	Yes	Yes	Yes	Yes	Yes	Yes
1000363	Alternative 5’ splice site	BnaA05g00020D	8494	8628	-	Yes	Yes	Yes	Yes	Yes	Yes
1000364	Alternative 3’ splice site	BnaA01g34500D	8524	10069	-	Yes	Yes	Yes	Yes	Yes	Yes
1000365	Alternative 5’ splice site	BnaC05g00030D	8590	8668	+	Yes	Yes	Yes	Yes	Yes	Yes
1000366	Alternative 3’ splice site	BnaC03g00020D	8610	8755	+	Yes	NO	NO	NO	NO	NO
1000367	Alternative 3’ splice site	BnaC03g00020D	8610	8759	+	NO	NO	NO	NO	NO	Yes
1000368	Alternative 3’ splice site	BnaC03g00020D	8610	8710	+	NO	NO	NO	NO	Yes	NO
1000369	Alternative 3’ splice site	BnaC03g00010D	8610	8754	+	NO	NO	NO	Yes	NO	NO
1000370	Alternative 3’ splice site	BnaC03g00020D	8610	8752	+	NO	NO	Yes	NO	NO	NO
1000371	Alternative 3’ splice site	BnaC03g00020D	8610	8749	+	NO	Yes	NO	NO	NO	NO
1000372	Alternative 3’ splice site	BnaC03g00020D	8610	8754	+	NO	NO	NO	Yes	NO	NO
1000373	Alternative 3’ splice site	BnaC02g00030D	8656	9109	+	Yes	Yes	Yes	Yes	Yes	Yes
1000374	Alternative 5’ splice site	BnaAnng00010D	8865	9149	+	Yes	NO	NO	NO	NO	NO
1000375	Alternative 5’ splice site	BnaAnng00010D	8865	9343	+	Yes	NO	NO	NO	NO	NO
1000376	Alternative 5’ splice site	BnaAnng00010D	8874	9149	+	NO	NO	NO	NO	Yes	NO
1000377	Alternative 3’ splice site	BnaC05g00030D	8876	9465	+	Yes	Yes	Yes	Yes	Yes	Yes
1000378	Alternative 5’ splice site	BnaAnng00010D	8885	9149	+	NO	Yes	NO	Yes	NO	NO
1000379	Alternative 5’ splice site	BnaAnng00010D	8886	9149	+	NO	NO	Yes	NO	NO	NO
1000380	Alternative 5’ splice site	BnaAnng00010D	8905	9149	+	NO	NO	NO	NO	NO	Yes
1000381	Cassette exon	BnaA03g00040D	8984	9037	+	NO	NO	NO	NO	NO	Yes
1000382	Cassette exon	BnaA03g00040D	8984	9037	+	Yes	Yes	Yes	Yes	Yes	Yes
1000383	Cassette exon	BnaA03g00040D	8984	9037	+	Yes	Yes	Yes	Yes	Yes	Yes
1000384	Alternative 5’ splice site	BnaC09g00030D	9006	9100	+	NO	NO	NO	Yes	NO	NO
1000385	Alternative 5’ splice site	BnaC09g00030D	9008	9100	+	Yes	NO	NO	NO	NO	NO
1000386	Alternative 5’ splice site	BnaC09g00030D	9032	9100	+	NO	Yes	Yes	NO	Yes	Yes
1000387	Alternative 5’ splice site	BnaC03g00030D	9124	9188	+	Yes	Yes	Yes	Yes	Yes	Yes
1000388	Alternative 3’ splice site	BnaA06g37430D	9130	9184	+	Yes	Yes	Yes	Yes	Yes	Yes
1000389	Alternative 5’ splice site	BnaA03g54800D	9152	9224	-	Yes	Yes	Yes	Yes	Yes	Yes
1000390	Alternative 3’ splice site	BnaA03g54810D	9308	9479	-	Yes	Yes	Yes	Yes	Yes	Yes
1000391	Intron rentition	BnaAnng00010D	9343	9429	+	Yes	NO	Yes	Yes	Yes	Yes
1000392	Intron rentition	BnaAnng00010D	9343	9429	+	Yes	NO	Yes	Yes	Yes	Yes
1000393	Alternative 3’ splice site	BnaA04g27250D	9382	9992	-	Yes	Yes	Yes	Yes	Yes	Yes
1000394	Mutually exclusive exons	BnaA02g34950D	9451	9539	-	Yes	Yes	Yes	NO	Yes	NO
1000395	Mutually exclusive exons	BnaA02g34950D	9451	9550	-	Yes	Yes	Yes	NO	Yes	NO
1000396	Alternative 3’ splice site	BnaA01g00040D	9520	9623	+	Yes	Yes	Yes	Yes	Yes	Yes
1000397	Alternative 5’ splice site	BnaA03g54810D	9535	9860	-	Yes	Yes	Yes	Yes	Yes	Yes
1000398	Alternative 5’ splice site	BnaA09g51610D	9546	9838	+	Yes	NO	NO	NO	NO	NO
1000399	Alternative 3’ splice site	BnaC03g00030D	9589	9628	+	Yes	Yes	Yes	Yes	Yes	Yes
1000400	Alternative 5’ splice site	BnaA09g51610D	9685	9838	+	NO	Yes	Yes	Yes	Yes	Yes
1000401	Alternative 5’ splice site	BnaC02g00040D	9816	10353	+	Yes	Yes	Yes	Yes	Yes	Yes
1000402	Alternative 3’ splice site	BnaA03g00040D	9859	10192	+	NO	NO	NO	NO	NO	Yes
1000403	Alternative 3’ splice site	BnaA03g00040D	9859	10035	+	NO	NO	Yes	NO	NO	NO
1000404	Alternative 3’ splice site	BnaA03g00040D	9859	10113	+	NO	Yes	NO	Yes	NO	NO
1000405	Alternative 3’ splice site	BnaA03g00040D	9859	10248	+	Yes	NO	NO	NO	NO	NO
1000406	Alternative 3’ splice site	BnaA03g00040D	9859	9866	+	NO	NO	NO	NO	Yes	NO
1000407	Alternative 3’ splice site	BnaC05g00040D	9949	10267	-	NO	NO	NO	Yes	NO	NO
1000408	Alternative 3’ splice site	BnaC05g00060D	9997	10267	-	NO	Yes	NO	NO	NO	NO
1000409	Alternative 3’ splice site	BnaC05g00060D	10000	10267	-	NO	NO	NO	NO	Yes	NO
1000410	Alternative 5’ splice site	BnaUnng00010D	10004	10223	+	NO	NO	Yes	NO	NO	NO
1000411	Alternative 5’ splice site	BnaUnng00010D	10016	10223	+	NO	NO	NO	NO	NO	Yes
1000412	Alternative 5’ splice site	BnaUnng00010D	10018	10223	+	NO	NO	NO	NO	Yes	NO
1000413	Alternative 5’ splice site	BnaC05g48970D	10042	10216	+	NO	NO	Yes	NO	NO	NO
1000414	Alternative 5’ splice site	BnaUnng00010D	10060	10223	+	NO	NO	NO	Yes	NO	NO
1000415	Alternative 5’ splice site	BnaUnng00010D	10063	10223	+	Yes	NO	NO	NO	NO	NO
1000416	Alternative 5’ splice site	BnaUnng00010D	10066	10223	+	NO	Yes	NO	NO	NO	NO
1000417	Alternative 5’ splice site	BnaC05g48970D	10116	10216	+	Yes	Yes	NO	Yes	Yes	Yes
1000418	Alternative 5’ splice site	BnaC01g00040D	10129	10380	-	Yes	Yes	Yes	Yes	Yes	Yes
1000419	Alternative 5’ splice site	BnaUnng00010D	10148	10226	+	Yes	Yes	Yes	Yes	Yes	Yes
1000420	Alternative 3’ splice site	BnaC05g00060D	10188	10426	-	Yes	NO	NO	NO	NO	NO
1000421	Alternative 3’ splice site	BnaC05g00040D	10220	10267	-	Yes	NO	Yes	NO	NO	Yes
1000422	Alternative 3’ splice site	BnaC01g00050D	10548	11061	-	NO	NO	NO	NO	Yes	NO
1000423	Alternative 3’ splice site	BnaC01g00050D	10553	10934	-	NO	NO	Yes	NO	NO	NO
1000424	Alternative 3’ splice site	BnaC01g00050D	10562	10934	-	NO	Yes	NO	NO	NO	NO
1000425	Alternative 3’ splice site	BnaC01g00050D	10580	10934	-	NO	NO	NO	NO	NO	Yes
1000426	Alternative 3’ splice site	BnaUnng00010D	10610	11258	+	NO	NO	NO	NO	NO	Yes
1000427	Alternative 3’ splice site	BnaUnng00010D	10610	11344	+	NO	NO	NO	NO	Yes	NO
1000428	Alternative 3’ splice site	BnaUnng00010D	10610	11063	+	NO	Yes	NO	NO	NO	NO
1000429	Alternative 3’ splice site	BnaUnng00010D	10610	11439	+	NO	NO	Yes	NO	NO	NO
1000430	Alternative 3’ splice site	BnaUnng00010D	10610	11113	+	Yes	NO	NO	NO	NO	NO
1000431	Alternative 3’ splice site	BnaUnng00010D	10610	11156	+	NO	NO	NO	Yes	NO	NO
1000432	Alternative 5’ splice site	BnaC05g00040D	10631	10724	-	Yes	NO	Yes	NO	NO	Yes
1000433	Alternative 3’ splice site	BnaC01g00050D	10669	10934	-	NO	NO	NO	Yes	NO	NO
1000434	Alternative 3’ splice site	BnaC01g00050D	10705	10934	-	Yes	NO	NO	NO	NO	NO
1000435	Alternative 5’ splice site	BnaA07g00010D	10712	10755	+	Yes	Yes	Yes	Yes	Yes	Yes
1000436	Alternative 5’ splice site	BnaC03g71150D	10722	10891	-	Yes	Yes	Yes	Yes	Yes	Yes
1000437	Alternative 5’ splice site	BnaA01g34500D	10738	10923	-	Yes	Yes	Yes	Yes	Yes	Yes
1000438	Alternative 5’ splice site	BnaA02g34950D	10810	10869	-	Yes	Yes	Yes	Yes	Yes	Yes
1000439	Alternative 3’ splice site	BnaC02g00040D	10877	11239	+	Yes	Yes	Yes	Yes	Yes	Yes
1000440	Alternative 3’ splice site	BnaC09g00030D	10896	11003	+	Yes	Yes	Yes	Yes	Yes	Yes
1000441	Alternative 5’ splice site	BnaC03g00040D	10915	11306	+	Yes	NO	NO	NO	NO	NO
1000442	Alternative 5’ splice site	BnaC03g00040D	10925	11306	+	NO	NO	NO	NO	Yes	NO
1000443	Alternative 3’ splice site	BnaC05g00050D	10950	12131	-	NO	NO	Yes	NO	NO	Yes
1000444	Alternative 5’ splice site	BnaC03g00040D	11051	11306	+	NO	Yes	NO	NO	NO	NO
1000445	Alternative 5’ splice site	BnaA03g00050D	11064	11543	+	NO	NO	NO	Yes	NO	NO
1000446	Alternative 5’ splice site	BnaC03g00040D	11077	11306	+	NO	NO	Yes	NO	NO	NO
1000447	Alternative 5’ splice site	BnaC03g00040D	11101	11306	+	NO	NO	NO	Yes	NO	Yes
1000448	Alternative 3’ splice site	BnaC04g51740D	11174	11315	-	Yes	Yes	Yes	Yes	Yes	Yes
1000449	Alternative 5’ splice site	BnaA03g00050D	11341	11900	+	NO	NO	NO	NO	NO	Yes
1000450	Alternative 5’ splice site	BnaA06g37440D	11388	11752	+	Yes	Yes	Yes	Yes	Yes	Yes
1000451	Alternative 5’ splice site	BnaA03g00050D	11421	11543	+	Yes	Yes	Yes	NO	Yes	Yes
1000452	Alternative 3’ splice site	BnaC09g00040D	11674	11910	-	Yes	Yes	Yes	Yes	Yes	Yes
1000453	Alternative 5’ splice site	BnaA03g00050D	11674	11900	+	NO	Yes	NO	NO	NO	NO
1000454	Alternative 5’ splice site	BnaA02g00020D	11701	11824	+	NO	NO	NO	NO	NO	Yes
1000455	Alternative 5’ splice site	BnaA08g29160D	11954	12591	+	Yes	Yes	Yes	Yes	Yes	Yes
1000456	Alternative 3’ splice site	BnaC06g00010D	11958	12313	-	NO	NO	NO	NO	NO	Yes
1000457	Alternative 3’ splice site	BnaC06g00010D	11963	12313	-	Yes	NO	NO	NO	NO	NO
1000458	Alternative 3’ splice site	BnaC06g00010D	11966	12178	-	NO	NO	Yes	NO	NO	NO
1000459	Alternative 3’ splice site	BnaC06g00010D	11966	12313	-	NO	NO	Yes	NO	NO	NO
1000460	Alternative 3’ splice site	BnaC06g00010D	11990	12313	-	NO	NO	NO	NO	Yes	NO
1000461	Alternative 3’ splice site	BnaC06g00010D	12039	12313	-	NO	Yes	NO	NO	NO	NO
1000462	Alternative 3’ splice site	BnaC06g00010D	12077	12313	-	NO	NO	NO	Yes	NO	NO
1000463	Alternative 5’ splice site	BnaC04g51740D	12161	12273	-	Yes	Yes	Yes	Yes	Yes	Yes
1000464	Alternative 5’ splice site	BnaC05g00040D	12201	12583	-	NO	NO	NO	Yes	NO	NO
1000465	Alternative 5’ splice site	BnaC05g00050D	12201	12557	-	NO	NO	Yes	NO	NO	Yes
1000466	Alternative 3’ splice site	BnaA06g37440D	12236	12478	+	Yes	Yes	Yes	Yes	Yes	Yes
1000467	Alternative 3’ splice site	BnaA07g00010D	12276	12627	+	Yes	Yes	Yes	Yes	Yes	Yes
1000468	Alternative 5’ splice site	BnaC01g00050D	12376	12486	-	Yes	Yes	Yes	Yes	Yes	Yes
1000469	Alternative 3’ splice site	BnaC04g51750D	12406	13041	-	Yes	Yes	Yes	Yes	Yes	Yes
1000470	Alternative 3’ splice site	BnaC06g00010D	12417	12446	-	Yes	Yes	Yes	Yes	Yes	Yes
1000471	Intron rentition	BnaC06g00010D	12446	12487	-	NO	Yes	Yes	Yes	Yes	Yes
1000472	Intron rentition	BnaC06g00010D	12446	13005	-	NO	NO	NO	Yes	NO	NO
1000473	Intron rentition	BnaC06g00010D	12446	12732	-	Yes	NO	Yes	NO	Yes	Yes
1000474	Intron rentition	BnaC06g00010D	12446	13005	-	NO	NO	NO	Yes	NO	NO
1000475	Intron rentition	BnaC06g00010D	12446	13135	-	NO	Yes	NO	Yes	NO	NO
1000476	Intron rentition	BnaC06g00010D	12446	13135	-	NO	Yes	NO	Yes	NO	NO
1000477	Intron rentition	BnaC06g00010D	12446	12732	-	Yes	NO	Yes	NO	Yes	Yes
1000478	Intron rentition	BnaC06g00010D	12446	12732	-	Yes	NO	NO	NO	NO	NO
1000479	Intron rentition	BnaC06g00010D	12446	12487	-	NO	Yes	Yes	Yes	Yes	Yes
1000480	Alternative 3’ splice site	BnaA05g00030D	12514	12665	-	Yes	Yes	Yes	Yes	Yes	Yes
1000481	Intron rentition	BnaC06g00010D	12532	13005	-	NO	Yes	NO	Yes	NO	NO
1000482	Intron rentition	BnaC06g00010D	12532	12732	-	NO	NO	Yes	NO	Yes	Yes
1000483	Intron rentition	BnaC06g00010D	12532	12732	-	NO	NO	NO	NO	NO	Yes
1000484	Intron rentition	BnaC06g00010D	12532	13005	-	NO	Yes	NO	NO	NO	NO
1000485	Intron rentition	BnaC06g00010D	12532	13005	-	NO	NO	NO	Yes	NO	NO
1000486	Intron rentition	BnaC06g00010D	12532	12732	-	NO	NO	NO	NO	NO	Yes
1000487	Intron rentition	BnaC06g00010D	12532	12732	-	NO	NO	Yes	NO	Yes	Yes
1000488	Cassette exon	BnaC03g00040D	12555	12646	+	NO	Yes	Yes	NO	Yes	NO
1000489	Cassette exon	BnaC03g00040D	12555	12903	+	NO	NO	Yes	NO	NO	NO
1000490	Cassette exon	BnaC03g00040D	12555	12903	+	NO	NO	Yes	NO	NO	NO
1000491	Cassette exon	BnaC03g00040D	12555	12646	+	NO	Yes	Yes	NO	Yes	NO
1000492	Mutually exclusive exons	BnaC06g00010D	12588	12640	-	NO	NO	NO	Yes	NO	NO
1000493	Alternative 5’ splice site	BnaA02g00020D	12594	13193	+	NO	NO	Yes	NO	NO	NO
1000494	Cassette exon	BnaC03g00040D	12596	12646	+	NO	NO	NO	NO	NO	Yes
1000495	Cassette exon	BnaC03g00040D	12596	12646	+	NO	NO	NO	NO	NO	Yes
1000496	Alternative 5’ splice site	BnaA02g00020D	12597	12976	+	NO	NO	NO	NO	Yes	NO
1000497	Mutually exclusive exons	BnaC06g00010D	12605	12640	-	NO	NO	NO	Yes	NO	NO
1000498	Cassette exon	BnaC06g00010D	12605	12640	-	Yes	NO	NO	NO	NO	NO
1000499	Cassette exon	BnaC06g00010D	12605	12640	-	Yes	NO	NO	NO	NO	NO
1000500	Alternative 5’ splice site	BnaA02g00020D	12613	12976	+	NO	NO	Yes	NO	NO	NO
1000501	Alternative 5’ splice site	BnaA02g00020D	12615	12976	+	NO	NO	NO	Yes	NO	NO
1000502	Alternative 5’ splice site	BnaA02g00020D	12630	12976	+	Yes	NO	NO	NO	NO	NO
1000503	Intron rentition	BnaC06g00010D	12640	12732	-	NO	NO	NO	Yes	NO	NO
1000504	Intron rentition	BnaC06g00010D	12640	12732	-	NO	NO	NO	Yes	NO	NO
1000505	Intron rentition	BnaC06g00010D	12640	12732	-	NO	NO	NO	Yes	NO	NO
1000506	Intron rentition	BnaC06g00010D	12640	12732	-	NO	NO	NO	Yes	NO	NO
1000507	Alternative 5’ splice site	BnaA02g00020D	12643	12976	+	NO	Yes	NO	NO	NO	NO
1000508	Alternative 3’ splice site	BnaA08g29160D	12664	13060	+	Yes	Yes	Yes	Yes	Yes	Yes
1000509	Alternative 3’ splice site	BnaC05g00060D	12697	12952	-	NO	NO	Yes	NO	NO	NO
1000510	Alternative 3’ splice site	BnaC05g00060D	12744	12952	-	NO	NO	NO	NO	NO	Yes
1000511	Cassette exon	BnaC03g00040D	12769	12939	+	NO	NO	Yes	NO	NO	NO
1000512	Mutually exclusive exons	BnaC03g00040D	12769	12939	+	Yes	NO	Yes	Yes	Yes	Yes
1000513	Cassette exon	BnaC03g00040D	12769	12939	+	NO	NO	Yes	NO	NO	NO
1000514	Mutually exclusive exons	BnaC03g00040D	12769	12889	+	NO	NO	NO	NO	NO	Yes
1000515	Mutually exclusive exons	BnaC03g00040D	12769	12903	+	NO	NO	Yes	Yes	Yes	NO
1000516	Mutually exclusive exons	BnaC03g00040D	12769	12924	+	Yes	NO	NO	NO	NO	NO
1000517	Alternative 5’ splice site	BnaC01g00050D	12774	12836	-	NO	NO	NO	NO	Yes	NO
1000518	Alternative 5’ splice site	BnaC01g00050D	12774	12822	-	NO	Yes	NO	NO	NO	NO
1000519	Alternative 5’ splice site	BnaC01g00050D	12774	12821	-	NO	NO	NO	NO	NO	Yes
1000520	Alternative 5’ splice site	BnaC01g00050D	12774	12832	-	Yes	NO	NO	NO	NO	NO
1000521	Alternative 5’ splice site	BnaC01g00050D	12774	12834	-	NO	NO	Yes	Yes	NO	NO
1000522	Alternative 5’ splice site	BnaA04g27250D	12791	12826	-	Yes	Yes	Yes	Yes	Yes	Yes
1000523	Intron rentition	BnaAnng00010D	12834	13063	+	Yes	NO	NO	NO	NO	NO
1000524	Intron rentition	BnaAnng00010D	12834	13063	+	Yes	NO	NO	NO	NO	NO
1000525	Alternative 3’ splice site	BnaC05g00060D	12867	13120	-	NO	NO	NO	Yes	NO	NO
1000526	Alternative 3’ splice site	BnaC05g00060D	12867	12952	-	NO	NO	NO	Yes	NO	NO
1000527	Alternative 3’ splice site	BnaC05g00060D	12875	12952	-	NO	Yes	NO	NO	NO	NO
1000528	Alternative 3’ splice site	BnaA06g37450D	12898	13335	-	Yes	Yes	Yes	Yes	Yes	Yes
1000529	Alternative 5’ splice site	BnaA10g27740D	12900	13393	+	Yes	Yes	Yes	Yes	Yes	Yes
1000530	Intron rentition	BnaC06g00010D	12916	13005	-	NO	NO	NO	NO	NO	Yes
1000531	Intron rentition	BnaC06g00010D	12916	13135	-	Yes	NO	NO	NO	NO	Yes
1000532	Intron rentition	BnaC06g00010D	12916	13005	-	NO	NO	NO	NO	NO	Yes
1000533	Intron rentition	BnaC06g00010D	12916	13135	-	Yes	NO	NO	NO	NO	Yes
1000534	Intron rentition	BnaC05g00060D	12952	13027	-	NO	Yes	NO	NO	NO	NO
1000535	Intron rentition	BnaC05g00060D	12952	13027	-	NO	Yes	NO	NO	NO	NO
1000536	Mutually exclusive exons	BnaC06g00010D	13005	13192	-	NO	NO	NO	NO	Yes	NO
1000537	Mutually exclusive exons	BnaC06g00010D	13005	13152	-	NO	NO	NO	NO	Yes	NO
1000538	Intron rentition	BnaC06g00010D	13033	13135	-	Yes	Yes	Yes	Yes	Yes	Yes
1000539	Intron rentition	BnaC06g00010D	13033	13135	-	Yes	Yes	Yes	Yes	Yes	Yes
1000540	Intron rentition	BnaC06g00010D	13033	13135	-	NO	NO	NO	NO	Yes	NO
1000541	Intron rentition	BnaC05g00060D	13120	13196	-	Yes	NO	NO	NO	Yes	NO
1000542	Intron rentition	BnaC05g00060D	13120	13196	-	Yes	NO	NO	NO	Yes	NO
1000543	Alternative 3’ splice site	BnaA07g00020D	13133	13237	-	Yes	Yes	Yes	Yes	Yes	Yes
1000544	Alternative 3’ splice site	BnaA04g00030D	13143	13418	-	Yes	Yes	Yes	Yes	Yes	Yes
1000545	Alternative 5’ splice site	BnaC02g00060D	13146	13342	+	Yes	Yes	Yes	Yes	Yes	Yes
1000546	Alternative 5’ splice site	BnaA08g00030D	13149	13461	+	Yes	Yes	Yes	Yes	Yes	Yes
1000547	Intron rentition	BnaA02g00020D	13193	13279	+	NO	NO	NO	NO	Yes	Yes
1000548	Intron rentition	BnaA02g00020D	13193	13279	+	NO	NO	NO	NO	Yes	Yes
1000549	Alternative 3’ splice site	BnaA07g35940D	13200	13485	+	Yes	Yes	Yes	Yes	Yes	Yes
1000550	Alternative 5’ splice site	BnaC03g71160D	13215	13257	+	Yes	Yes	Yes	Yes	Yes	Yes
1000551	Alternative 3’ splice site	BnaAnng00010D	13267	13549	+	Yes	NO	NO	NO	NO	NO
1000552	Alternative 3’ splice site	BnaAnng00010D	13267	13527	+	NO	Yes	NO	NO	NO	NO
1000553	Alternative 3’ splice site	BnaAnng00010D	13267	13304	+	NO	NO	NO	Yes	NO	NO
1000554	Alternative 3’ splice site	BnaAnng00010D	13267	13945	+	NO	NO	Yes	NO	NO	NO
1000555	Mutually exclusive exons	BnaA02g00020D	13279	13458	+	Yes	NO	NO	NO	NO	NO
1000556	Mutually exclusive exons	BnaA02g00020D	13279	13448	+	Yes	NO	NO	NO	NO	NO
1000557	Alternative 5’ splice site	BnaC09g00040D	13286	13615	-	Yes	Yes	Yes	Yes	Yes	Yes
1000558	Intron rentition	BnaC06g00010D	13290	13355	-	Yes	Yes	Yes	Yes	Yes	Yes
1000559	Intron rentition	BnaC06g00010D	13290	13355	-	Yes	Yes	Yes	Yes	Yes	Yes
1000560	Alternative 3’ splice site	BnaA08g29170D	13369	13670	-	Yes	Yes	Yes	Yes	Yes	Yes
1000561	Alternative 5’ splice site	BnaA04g27260D	13421	14658	+	NO	NO	Yes	NO	NO	NO
1000562	Intron rentition	BnaC05g00060D	13447	13646	-	NO	NO	Yes	NO	NO	Yes
1000563	Intron rentition	BnaC05g00060D	13447	13646	-	NO	NO	Yes	NO	NO	Yes
1000564	Alternative 5’ splice site	BnaA04g27260D	13478	14658	+	NO	NO	NO	NO	Yes	NO
1000565	Alternative 3’ splice site	BnaC05g48970D	13479	13706	+	Yes	Yes	NO	Yes	Yes	Yes
1000566	Alternative 3’ splice site	BnaC05g48970D	13479	14352	+	NO	NO	Yes	NO	NO	NO
1000567	Alternative 3’ splice site	BnaC03g71160D	13483	13735	+	Yes	Yes	Yes	Yes	Yes	Yes
1000568	Alternative 5’ splice site	BnaA03g54820D	13492	13675	+	Yes	Yes	Yes	Yes	Yes	Yes
1000569	Intron rentition	BnaC06g00010D	13540	13577	-	Yes	Yes	Yes	Yes	Yes	Yes
1000570	Intron rentition	BnaC06g00010D	13540	13577	-	Yes	Yes	Yes	Yes	Yes	Yes
1000571	Alternative 5’ splice site	BnaC04g51750D	13651	13848	-	Yes	Yes	Yes	Yes	Yes	Yes
1000572	Alternative 5’ splice site	BnaA05g00030D	13652	13705	-	Yes	Yes	Yes	Yes	Yes	Yes
1000573	Alternative 3’ splice site	BnaAnng00010D	13736	13947	+	NO	NO	NO	NO	Yes	NO
1000574	Alternative 3’ splice site	BnaAnng00010D	13736	13765	+	NO	NO	NO	NO	NO	Yes
1000575	Alternative 5’ splice site	BnaC06g00010D	13794	14042	-	NO	NO	NO	Yes	NO	NO
1000576	Alternative 5’ splice site	BnaC06g00010D	13794	13846	-	Yes	Yes	Yes	NO	Yes	Yes
1000577	Intron rentition	BnaA03g00050D	13819	13911	+	NO	NO	Yes	NO	NO	Yes
1000578	Intron rentition	BnaA03g00050D	13819	13911	+	NO	NO	Yes	NO	NO	Yes
1000579	Alternative 3’ splice site	BnaCnng00020D	13845	13994	-	NO	Yes	Yes	Yes	Yes	Yes
1000580	Alternative 5’ splice site	BnaA06g37450D	14047	16065	-	Yes	Yes	Yes	Yes	Yes	Yes
1000581	Alternative 3’ splice site	BnaA10g27740D	14054	14275	+	Yes	Yes	Yes	Yes	Yes	Yes
1000582	Intron rentition	BnaA02g00020D	14112	14188	+	NO	NO	NO	NO	Yes	NO
1000583	Intron rentition	BnaA02g00020D	14112	14188	+	NO	NO	NO	NO	Yes	NO
1000584	Alternative 3’ splice site	BnaC03g00040D	14172	14697	+	NO	Yes	NO	NO	NO	NO
1000585	Alternative 3’ splice site	BnaC03g00040D	14172	14779	+	Yes	NO	NO	NO	Yes	Yes
1000586	Alternative 3’ splice site	BnaC03g00040D	14172	14777	+	NO	NO	Yes	NO	NO	NO
1000587	Alternative 3’ splice site	BnaC03g00040D	14172	14740	+	NO	NO	NO	Yes	NO	NO
1000588	Alternative 5’ splice site	BnaA07g00020D	14177	14398	-	Yes	Yes	Yes	Yes	Yes	Yes
1000589	Alternative 3’ splice site	BnaA01g00050D	14270	15001	-	Yes	Yes	Yes	Yes	Yes	Yes
1000590	Alternative 3’ splice site	BnaA02g00020D	14337	14523	+	Yes	Yes	NO	Yes	Yes	Yes
1000591	Alternative 3’ splice site	BnaA02g00020D	14340	14523	+	Yes	Yes	Yes	Yes	NO	NO
1000592	Alternative 3’ splice site	BnaA02g00020D	14340	14433	+	NO	NO	NO	NO	NO	Yes
1000593	Alternative 5’ splice site	BnaA08g29170D	14397	14519	-	Yes	Yes	Yes	Yes	Yes	Yes
1000594	Intron rentition	BnaA03g00050D	14598	14703	+	NO	NO	NO	Yes	NO	NO
1000595	Intron rentition	BnaA03g00050D	14598	14703	+	NO	NO	NO	Yes	NO	NO
1000596	Intron rentition	BnaC05g00060D	14721	14829	-	NO	NO	NO	Yes	NO	NO
1000597	Intron rentition	BnaC05g00060D	14721	14829	-	NO	NO	NO	Yes	NO	NO
1000598	Alternative 3’ splice site	BnaC02g00060D	14762	15919	+	Yes	Yes	Yes	Yes	Yes	Yes
1000599	Alternative 3’ splice site	BnaA04g27260D	14800	15021	+	NO	NO	Yes	NO	NO	NO
1000600	Alternative 3’ splice site	BnaA04g27260D	14800	15029	+	NO	NO	NO	NO	Yes	NO
1000601	Alternative 3’ splice site	BnaC01g00060D	14805	15132	-	Yes	Yes	Yes	Yes	Yes	Yes
1000602	Alternative 5’ splice site	BnaA02g00030D	14834	15049	+	Yes	Yes	Yes	Yes	Yes	Yes
1000603	Alternative 3’ splice site	BnaA09g51610D	14862	14900	+	Yes	Yes	Yes	Yes	Yes	Yes
1000604	Alternative 3’ splice site	BnaA01g00050D	14862	14996	-	NO	NO	NO	NO	Yes	NO
1000605	Alternative 5’ splice site	BnaA04g00030D	14889	15366	-	Yes	Yes	Yes	Yes	Yes	Yes
1000606	Alternative 3’ splice site	BnaA05g34220D	14921	15367	-	Yes	Yes	Yes	Yes	Yes	Yes
1000607	Mutually exclusive exons	BnaC05g00060D	14987	15058	-	NO	NO	NO	Yes	NO	NO
1000608	Mutually exclusive exons	BnaC05g00060D	14987	15035	-	NO	NO	NO	Yes	NO	NO
1000609	Alternative 3’ splice site	BnaA03g54820D	15000	15180	+	Yes	Yes	Yes	Yes	Yes	Yes
1000610	Alternative 5’ splice site	BnaUnng00030D	15072	15145	+	Yes	Yes	Yes	Yes	Yes	Yes
1000611	Mutually exclusive exons	BnaA01g00050D	15082	15467	-	Yes	NO	NO	NO	NO	Yes
1000612	Mutually exclusive exons	BnaA01g00050D	15082	15485	-	Yes	NO	NO	NO	NO	Yes
1000613	Alternative 3’ splice site	BnaA06g00030D	15215	15461	-	Yes	Yes	Yes	Yes	Yes	Yes
1000614	Intron rentition	BnaA03g00050D	15251	15342	+	NO	NO	NO	NO	NO	Yes
1000615	Intron rentition	BnaA03g00050D	15251	15342	+	NO	NO	NO	NO	NO	Yes
1000616	Alternative 3’ splice site	BnaA07g00030D	15277	15320	-	Yes	Yes	Yes	Yes	Yes	Yes
1000617	Alternative 3’ splice site	BnaA08g00030D	15292	15574	+	Yes	Yes	Yes	Yes	Yes	Yes
1000618	Intron rentition	BnaA03g00050D	15393	15487	+	NO	NO	Yes	NO	NO	NO
1000619	Intron rentition	BnaA03g00050D	15393	15487	+	NO	NO	Yes	NO	NO	NO
1000620	Mutually exclusive exons	BnaCnng00020D	15400	15488	-	NO	NO	NO	NO	NO	Yes
1000621	Mutually exclusive exons	BnaCnng00020D	15400	15475	-	NO	NO	NO	NO	NO	Yes
1000622	Alternative 3’ splice site	BnaA08g00040D	15484	15897	-	NO	NO	NO	NO	NO	Yes
1000623	Alternative 5’ splice site	BnaA02g34960D	15524	15936	+	Yes	Yes	Yes	Yes	Yes	Yes
1000624	Alternative 5’ splice site	BnaC01g40650D	15532	16300	+	NO	NO	Yes	NO	NO	NO
1000625	Alternative 5’ splice site	BnaC01g40650D	15535	16300	+	NO	NO	NO	Yes	NO	NO
1000626	Alternative 5’ splice site	BnaC01g40650D	15544	16300	+	Yes	NO	NO	NO	NO	NO
1000627	Cassette exon	BnaCnng00020D	15557	15606	-	NO	NO	NO	NO	Yes	NO
1000628	Mutually exclusive exons	BnaCnng00020D	15557	15627	-	NO	Yes	NO	NO	NO	NO
1000629	Mutually exclusive exons	BnaCnng00020D	15557	15606	-	NO	Yes	NO	NO	NO	NO
1000630	Cassette exon	BnaCnng00020D	15557	15606	-	NO	NO	NO	NO	Yes	NO
1000631	Alternative 5’ splice site	BnaCnng00020D	15571	15996	+	Yes	NO	NO	NO	NO	NO
1000632	Intron rentition	BnaCnng00020D	15606	15727	-	NO	NO	Yes	Yes	NO	Yes
1000633	Intron rentition	BnaCnng00020D	15606	15727	-	NO	NO	Yes	Yes	NO	Yes
1000634	Alternative 5’ splice site	BnaC01g40650D	15627	16300	+	NO	Yes	NO	NO	Yes	Yes
1000635	Alternative 5’ splice site	BnaA01g00050D	15628	15906	-	Yes	Yes	Yes	Yes	Yes	Yes
1000636	Alternative 5’ splice site	BnaA05g34220D	15698	15982	-	Yes	Yes	Yes	Yes	Yes	Yes
1000637	Mutually exclusive exons	BnaA02g00030D	15751	16317	+	Yes	NO	NO	NO	NO	NO
1000638	Mutually exclusive exons	BnaA02g00030D	15751	16222	+	Yes	NO	NO	NO	NO	NO
1000639	Alternative 5’ splice site	BnaAnng00020D	15767	16360	+	NO	NO	Yes	NO	NO	NO
1000640	Alternative 5’ splice site	BnaAnng00020D	15767	16157	+	NO	NO	Yes	NO	NO	NO
1000641	Alternative 5’ splice site	BnaC09g00050D	15774	15954	+	Yes	Yes	Yes	Yes	Yes	Yes
1000642	Alternative 5’ splice site	BnaAnng00020D	15774	16157	+	Yes	NO	NO	NO	NO	NO
1000643	Alternative 3’ splice site	BnaC08g00040D	15775	15920	-	Yes	Yes	Yes	Yes	Yes	Yes
1000644	Alternative 5’ splice site	BnaAnng00020D	15799	16157	+	NO	Yes	NO	NO	NO	NO
1000645	Alternative 5’ splice site	BnaAnng00020D	15830	16360	+	NO	NO	NO	NO	Yes	NO
1000646	Alternative 3’ splice site	BnaAnng00020D	15830	16312	-	NO	NO	NO	NO	Yes	NO
1000647	Alternative 3’ splice site	BnaA03g00050D	15836	16306	+	Yes	Yes	Yes	NO	Yes	NO
1000648	Alternative 3’ splice site	BnaA03g00050D	15836	16364	+	NO	NO	NO	NO	NO	Yes
1000649	Alternative 3’ splice site	BnaA03g00050D	15836	16362	+	NO	NO	NO	Yes	NO	NO
1000650	Alternative 5’ splice site	BnaAnng00020D	15840	16360	+	NO	NO	NO	Yes	NO	NO
1000651	Alternative 5’ splice site	BnaAnng00020D	15840	16157	+	NO	NO	NO	Yes	NO	NO
1000652	Alternative 5’ splice site	BnaAnng00020D	15886	16157	+	NO	NO	NO	NO	Yes	Yes
1000653	Alternative 3’ splice site	BnaA05g00040D	15890	16126	-	Yes	Yes	Yes	Yes	Yes	Yes
1000654	Alternative 5’ splice site	BnaCnng00020D	15894	16098	-	NO	NO	NO	Yes	NO	NO
1000655	Alternative 5’ splice site	BnaCnng00020D	15894	16099	-	NO	NO	Yes	NO	NO	Yes
1000656	Alternative 5’ splice site	BnaCnng00020D	15894	16097	-	NO	Yes	NO	NO	NO	NO
1000657	Alternative 5’ splice site	BnaCnng00020D	15894	16109	-	NO	NO	NO	NO	Yes	NO
1000658	Alternative 3’ splice site	BnaA08g00040D	15986	17699	-	NO	Yes	NO	NO	NO	NO
1000659	Alternative 3’ splice site	BnaA08g00040D	15993	17699	-	NO	NO	NO	NO	NO	Yes
1000660	Alternative 3’ splice site	BnaA08g00040D	15995	17699	-	NO	NO	NO	Yes	NO	NO
1000661	Alternative 3’ splice site	BnaA08g00040D	16007	17699	-	NO	NO	Yes	NO	NO	NO
1000662	Alternative 3’ splice site	BnaA08g00040D	16051	17699	-	Yes	NO	NO	NO	Yes	NO
1000663	Alternative 3’ splice site	BnaC02g00070D	16139	16774	-	Yes	Yes	Yes	Yes	Yes	Yes
1000664	Alternative 5’ splice site	BnaA05g00040D	16215	16410	-	Yes	Yes	Yes	Yes	Yes	Yes
1000665	Alternative 5’ splice site	BnaA06g00030D	16343	16810	-	Yes	Yes	Yes	Yes	Yes	Yes
1000666	Alternative 5’ splice site	BnaC05g00060D	16373	16415	-	Yes	Yes	Yes	Yes	Yes	Yes
1000667	Alternative 3’ splice site	BnaA02g34960D	16444	16678	+	Yes	Yes	Yes	Yes	Yes	Yes
1000668	Alternative 3’ splice site	BnaAnng00020D	16445	16953	+	NO	Yes	NO	NO	NO	NO
1000669	Alternative 3’ splice site	BnaAnng00020D	16445	17127	+	Yes	NO	NO	NO	NO	NO
1000670	Alternative 3’ splice site	BnaAnng00020D	16462	17076	+	NO	NO	Yes	NO	NO	NO
1000671	Alternative 3’ splice site	BnaAnng00020D	16462	16852	+	Yes	Yes	NO	NO	NO	Yes
1000672	Alternative 3’ splice site	BnaA05g00050D	16466	16728	-	Yes	Yes	Yes	Yes	Yes	Yes
1000673	Alternative 3’ splice site	BnaAnng00020D	16506	17207	+	NO	NO	NO	Yes	NO	NO
1000674	Alternative 3’ splice site	BnaA08g29180D	16519	16585	-	Yes	Yes	Yes	Yes	Yes	Yes
1000675	Alternative 5’ splice site	BnaC05g00070D	16586	16885	+	NO	NO	NO	NO	NO	Yes
1000676	Alternative 5’ splice site	BnaC05g00070D	16588	16885	+	NO	NO	NO	Yes	NO	NO
1000677	Alternative 5’ splice site	BnaC05g00070D	16597	16885	+	Yes	Yes	Yes	NO	NO	NO
1000678	Alternative 5’ splice site	BnaC05g00070D	16598	16885	+	NO	NO	NO	NO	Yes	NO
1000679	Alternative 3’ splice site	BnaA07g35950D	16765	17178	-	Yes	Yes	Yes	Yes	Yes	Yes
1000680	Alternative 5’ splice site	BnaA03g00070D	16799	17023	+	NO	Yes	NO	NO	NO	NO
1000681	Alternative 5’ splice site	BnaA03g00070D	16843	17023	+	NO	NO	NO	Yes	NO	NO
1000682	Alternative 5’ splice site	BnaA03g00070D	16844	17023	+	NO	NO	NO	NO	Yes	NO
1000683	Alternative 5’ splice site	BnaC02g00070D	16845	16994	-	Yes	Yes	Yes	Yes	Yes	Yes
1000684	Alternative 5’ splice site	BnaA03g00070D	16853	17023	+	NO	NO	Yes	NO	NO	NO
1000685	Cassette exon	BnaC05g00070D	16939	16962	+	Yes	Yes	Yes	Yes	Yes	Yes
1000686	Cassette exon	BnaC05g00070D	16939	16962	+	Yes	Yes	Yes	Yes	Yes	Yes
1000687	Alternative 5’ splice site	BnaA03g00070D	16998	17220	+	NO	Yes	NO	NO	NO	NO
1000688	Alternative 5’ splice site	BnaA03g00070D	17136	17220	+	Yes	NO	NO	NO	NO	Yes
1000689	Mutually exclusive exons	BnaA03g00070D	17136	17220	+	NO	Yes	NO	NO	NO	NO
1000690	Mutually exclusive exons	BnaA03g00070D	17147	17220	+	NO	Yes	NO	NO	NO	NO
1000691	Alternative 3’ splice site	BnaA02g34970D	17179	17284	-	Yes	Yes	Yes	Yes	Yes	Yes
1000692	Alternative 5’ splice site	BnaC08g00040D	17201	17363	-	Yes	Yes	Yes	Yes	Yes	Yes
1000693	Alternative 3’ splice site	BnaA04g27280D	17227	17406	-	NO	NO	Yes	NO	NO	NO
1000694	Alternative 5’ splice site	BnaC06g40730D	17230	18389	+	NO	NO	Yes	NO	NO	NO
1000695	Alternative 5’ splice site	BnaC06g40730D	17274	18180	+	NO	NO	NO	Yes	NO	NO
1000696	Alternative 5’ splice site	BnaC06g40730D	17280	18389	+	NO	NO	NO	NO	Yes	NO
1000697	Alternative 5’ splice site	BnaC06g40730D	17282	18389	+	NO	NO	NO	NO	NO	Yes
1000698	Alternative 3’ splice site	BnaA04g27280D	17320	17406	-	NO	NO	NO	NO	NO	Yes
1000699	Alternative 5’ splice site	BnaC06g40730D	17341	18180	+	Yes	Yes	Yes	NO	Yes	NO
1000700	Alternative 3’ splice site	BnaA04g27280D	17344	17406	-	Yes	Yes	NO	Yes	Yes	NO
1000701	Alternative 5’ splice site	BnaC02g00080D	17365	17580	+	Yes	Yes	Yes	Yes	Yes	Yes
1000702	Mutually exclusive exons	BnaA03g00070D	17390	17520	+	NO	Yes	Yes	Yes	Yes	NO
1000703	Mutually exclusive exons	BnaA03g00070D	17409	17520	+	NO	Yes	Yes	Yes	Yes	NO
1000704	Alternative 3’ splice site	BnaUnng00030D	17487	17846	+	Yes	Yes	Yes	Yes	Yes	Yes
1000705	Alternative 3’ splice site	BnaA09g00050D	17488	17764	-	Yes	Yes	Yes	Yes	Yes	Yes
1000706	Alternative 5’ splice site	BnaA09g51620D	17498	17712	+	NO	NO	NO	Yes	NO	NO
1000707	Alternative 5’ splice site	BnaA09g51620D	17502	17712	+	NO	NO	Yes	NO	NO	NO
1000708	Alternative 3’ splice site	BnaC02g44120D	17509	17616	-	Yes	Yes	Yes	Yes	Yes	Yes
1000709	Alternative 5’ splice site	BnaA06g37470D	17558	17714	+	Yes	Yes	Yes	Yes	Yes	Yes
1000710	Alternative 5’ splice site	BnaA09g51620D	17559	17712	+	Yes	Yes	NO	NO	Yes	Yes
1000711	Alternative 5’ splice site	BnaC08g00050D	17581	18073	+	NO	Yes	NO	Yes	NO	NO
1000712	Alternative 5’ splice site	BnaC08g00050D	17581	18001	+	NO	NO	NO	NO	NO	Yes
1000713	Alternative 5’ splice site	BnaC08g00050D	17581	17903	+	Yes	Yes	Yes	Yes	Yes	Yes
1000714	Alternative 3’ splice site	BnaC05g00070D	17626	17708	+	NO	NO	NO	Yes	NO	NO
1000715	Alternative 3’ splice site	BnaC05g00070D	17626	17809	+	NO	Yes	NO	NO	NO	NO
1000716	Alternative 3’ splice site	BnaC05g00070D	17626	17822	+	NO	NO	Yes	NO	NO	NO
1000717	Alternative 3’ splice site	BnaC05g00070D	17626	17727	+	NO	NO	NO	NO	NO	Yes
1000718	Alternative 3’ splice site	BnaC05g00070D	17626	17826	+	NO	NO	NO	NO	Yes	NO
1000719	Alternative 3’ splice site	BnaC05g00070D	17626	17752	+	Yes	NO	NO	NO	NO	NO
1000720	Alternative 3’ splice site	BnaC02g00080D	17636	17696	+	Yes	Yes	Yes	Yes	Yes	Yes
1000721	Alternative 3’ splice site	BnaC01g40650D	17643	19503	+	Yes	NO	NO	NO	NO	NO
1000722	Alternative 3’ splice site	BnaC01g40650D	17643	19453	+	NO	NO	NO	NO	Yes	NO
1000723	Alternative 3’ splice site	BnaC01g40650D	17643	17727	+	NO	Yes	Yes	Yes	NO	Yes
1000724	Alternative 5’ splice site	BnaA05g34230D	17666	18644	+	Yes	Yes	Yes	Yes	Yes	Yes
1000725	Alternative 3’ splice site	BnaA09g00050D	17669	17767	-	NO	NO	Yes	NO	NO	NO
1000726	Alternative 3’ splice site	BnaA09g00050D	17680	17767	-	NO	NO	NO	Yes	NO	NO
1000727	Intron rentition	BnaA04g27280D	17681	17770	-	NO	NO	NO	NO	NO	Yes
1000728	Intron rentition	BnaA04g27280D	17681	17770	-	NO	NO	NO	NO	NO	Yes
1000729	Alternative 3’ splice site	BnaA09g00050D	17686	17767	-	NO	NO	NO	NO	NO	Yes
1000730	Alternative 3’ splice site	BnaA02g00030D	17696	18467	+	Yes	Yes	NO	Yes	Yes	Yes
1000731	Alternative 3’ splice site	BnaA02g00030D	17712	18520	+	Yes	NO	NO	NO	NO	NO
1000732	Alternative 5’ splice site	BnaC06g40730D	17720	18180	+	NO	NO	NO	NO	NO	Yes
1000733	Alternative 3’ splice site	BnaA09g00050D	17722	17767	-	NO	Yes	NO	NO	NO	NO
1000734	Alternative 5’ splice site	BnaC02g00090D	17747	18031	+	Yes	Yes	Yes	Yes	Yes	Yes
1000735	Alternative 5’ splice site	BnaC08g00050D	17915	18073	+	NO	NO	NO	NO	Yes	NO
1000736	Mutually exclusive exons	BnaA08g00040D	17947	18788	-	NO	NO	Yes	NO	NO	NO
1000737	Alternative 5’ splice site	BnaA07g00030D	17953	18139	-	Yes	Yes	Yes	Yes	Yes	Yes
1000738	Mutually exclusive exons	BnaA08g00040D	17970	18788	-	NO	NO	Yes	NO	NO	NO
1000739	Cassette exon	BnaC08g00050D	17980	18001	+	NO	NO	NO	Yes	NO	NO
1000740	Cassette exon	BnaC08g00050D	17980	18001	+	NO	NO	NO	Yes	NO	NO
1000741	Intron rentition	BnaC08g00050D	18001	18021	+	Yes	NO	Yes	NO	Yes	Yes
1000742	Intron rentition	BnaC08g00050D	18001	18021	+	Yes	NO	Yes	NO	Yes	Yes
1000743	Alternative 5’ splice site	BnaA04g27280D	18070	18092	-	NO	NO	Yes	NO	NO	NO
1000744	Alternative 3’ splice site	BnaA04g27280D	18085	18485	-	NO	NO	NO	Yes	NO	NO
1000745	Alternative 3’ splice site	BnaA06g37470D	18097	18515	+	Yes	Yes	Yes	Yes	Yes	Yes
1000746	Alternative 5’ splice site	BnaA02g34970D	18134	18352	-	Yes	Yes	Yes	Yes	Yes	Yes
1000747	Alternative 3’ splice site	BnaC08g00050D	18210	18591	+	NO	Yes	NO	NO	NO	NO
1000748	Alternative 5’ splice site	BnaA01g00060D	18236	18698	+	Yes	Yes	Yes	Yes	Yes	Yes
1000749	Alternative 3’ splice site	BnaC05g00080D	18299	18697	-	NO	Yes	NO	NO	NO	NO
1000750	Alternative 5’ splice site	BnaA03g54830D	18361	18411	+	Yes	Yes	Yes	Yes	Yes	Yes
1000751	Alternative 5’ splice site	BnaA08g29180D	18389	18405	-	Yes	Yes	Yes	Yes	Yes	Yes
1000752	Alternative 5’ splice site	BnaC01g00060D	18421	18604	-	Yes	Yes	Yes	Yes	Yes	Yes
1000753	Alternative 3’ splice site	BnaC05g00080D	18455	18697	-	Yes	NO	Yes	Yes	Yes	Yes
1000754	Alternative 3’ splice site	BnaC09g00050D	18477	18764	+	Yes	Yes	Yes	Yes	Yes	Yes
1000755	Alternative 3’ splice site	BnaA08g29190D	18508	18836	-	Yes	Yes	Yes	Yes	Yes	Yes
1000756	Alternative 3’ splice site	BnaC08g00050D	18533	19456	+	Yes	NO	NO	NO	NO	NO
1000757	Alternative 3’ splice site	BnaC08g00050D	18533	18709	+	NO	NO	NO	NO	Yes	NO
1000758	Alternative 3’ splice site	BnaC08g00050D	18533	18887	+	NO	NO	NO	NO	NO	Yes
1000759	Alternative 3’ splice site	BnaC08g00050D	18533	19199	+	NO	NO	NO	Yes	NO	NO
1000760	Alternative 3’ splice site	BnaC08g00050D	18533	18591	+	NO	NO	Yes	NO	NO	NO
1000761	Alternative 5’ splice site	BnaA04g27280D	18585	18709	-	NO	NO	NO	Yes	NO	NO
1000762	Alternative 5’ splice site	BnaA04g27280D	18585	18653	-	Yes	Yes	Yes	NO	Yes	Yes
1000763	Alternative 5’ splice site	BnaA06g00040D	18597	19073	+	Yes	Yes	Yes	Yes	Yes	Yes
1000764	Alternative 3’ splice site	BnaC02g00090D	18621	19193	+	Yes	Yes	Yes	Yes	Yes	Yes
1000765	Alternative 5’ splice site	BnaA01g34510D	18640	18907	+	NO	NO	NO	NO	NO	Yes
1000766	Alternative 5’ splice site	BnaA01g34510D	18645	18884	+	Yes	Yes	Yes	Yes	Yes	Yes
1000767	Alternative 5’ splice site	BnaA01g34510D	18645	18907	+	Yes	Yes	Yes	Yes	Yes	NO
1000768	Alternative 3’ splice site	BnaA03g54830D	18680	19837	+	Yes	Yes	Yes	Yes	Yes	Yes
1000769	Alternative 3’ splice site	BnaA02g00030D	18762	19006	+	NO	NO	Yes	NO	NO	NO
1000770	Alternative 5’ splice site	BnaA07g35950D	18764	18820	-	Yes	Yes	Yes	Yes	Yes	Yes
1000771	Intron rentition	BnaA08g00040D	18788	18878	-	Yes	NO	NO	NO	NO	NO
1000772	Intron rentition	BnaA08g00040D	18788	18878	-	Yes	NO	NO	NO	NO	NO
1000773	Alternative 3’ splice site	BnaA01g00060D	18788	19430	+	Yes	Yes	Yes	Yes	Yes	Yes
1000774	Intron rentition	BnaA09g51620D	18923	19004	+	NO	NO	NO	Yes	NO	NO
1000775	Intron rentition	BnaA09g51620D	18923	19004	+	NO	NO	NO	Yes	NO	NO
1000776	Alternative 5’ splice site	BnaA09g00050D	18992	19794	-	Yes	Yes	Yes	Yes	Yes	Yes
1000777	Alternative 3’ splice site	BnaC06g40730D	19106	19345	+	NO	NO	Yes	NO	NO	NO
1000778	Alternative 3’ splice site	BnaC06g40730D	19106	19258	+	NO	NO	NO	NO	Yes	NO
1000779	Alternative 3’ splice site	BnaC06g40730D	19106	19204	+	Yes	Yes	NO	Yes	NO	NO
1000780	Alternative 3’ splice site	BnaC06g40730D	19140	19319	+	NO	NO	NO	Yes	NO	NO
1000781	Intron rentition	BnaC05g00080D	19159	19456	-	NO	NO	NO	Yes	NO	NO
1000782	Intron rentition	BnaC05g00080D	19159	19456	-	NO	NO	NO	Yes	NO	NO
1000783	Intron rentition	BnaC05g00080D	19159	19257	-	Yes	Yes	NO	NO	NO	Yes
1000784	Intron rentition	BnaC05g00080D	19159	19257	-	Yes	Yes	NO	NO	NO	Yes
1000785	Alternative 5’ splice site	BnaC04g51770D	19239	19344	+	NO	NO	Yes	NO	NO	NO
1000786	Mutually exclusive exons	BnaA06g00040D	19243	19378	+	NO	NO	NO	Yes	NO	NO
1000787	Mutually exclusive exons	BnaA06g00040D	19243	19309	+	NO	NO	NO	Yes	NO	NO
1000788	Alternative 5’ splice site	BnaC04g51770D	19255	19344	+	NO	Yes	NO	NO	NO	NO
1000789	Alternative 5’ splice site	BnaC04g51780D	19263	19344	+	NO	NO	NO	NO	Yes	NO
1000790	Alternative 5’ splice site	BnaC04g51780D	19268	19344	+	NO	NO	NO	Yes	NO	NO
1000791	Alternative 5’ splice site	BnaC04g51780D	19277	19344	+	NO	NO	NO	NO	NO	Yes
1000792	Alternative 5’ splice site	BnaC04g51770D	19313	19344	+	Yes	NO	NO	NO	NO	NO
1000793	Alternative 5’ splice site	BnaC04g51770D	19313	19685	+	Yes	NO	NO	NO	NO	NO
1000794	Alternative 5’ splice site	BnaC02g00100D	19404	19544	+	Yes	Yes	Yes	Yes	Yes	Yes
1000795	Alternative 3’ splice site	BnaC06g40730D	19424	19495	+	NO	NO	NO	NO	NO	Yes
1000796	Alternative 3’ splice site	BnaA01g34510D	19490	19686	+	Yes	Yes	Yes	Yes	Yes	Yes
1000797	Alternative 5’ splice site	BnaA02g00040D	19514	19684	+	Yes	Yes	Yes	Yes	Yes	Yes
1000798	Intron rentition	BnaA08g00040D	19624	19725	-	Yes	Yes	Yes	Yes	Yes	Yes
1000799	Intron rentition	BnaA08g00040D	19624	19725	-	Yes	Yes	Yes	Yes	Yes	Yes
1000800	Intron rentition	BnaC05g00080D	19696	19799	-	NO	Yes	NO	NO	NO	NO
1000801	Intron rentition	BnaC05g00080D	19696	19799	-	NO	Yes	NO	NO	NO	NO
1000802	Alternative 3’ splice site	BnaA09g51620D	19729	19987	+	NO	NO	NO	Yes	NO	NO
1000803	Alternative 3’ splice site	BnaA09g51620D	19729	19959	+	Yes	Yes	Yes	NO	Yes	Yes
1000804	Alternative 5’ splice site	BnaA05g00050D	19748	19778	-	Yes	Yes	Yes	Yes	Yes	Yes
1000805	Alternative 3’ splice site	BnaC03g71180D	19972	20067	-	Yes	Yes	Yes	Yes	Yes	Yes
1000806	Alternative 3’ splice site	BnaA04g27290D	20015	20489	-	Yes	NO	NO	NO	NO	NO
1000807	Alternative 3’ splice site	BnaA04g27290D	20015	20624	-	Yes	NO	NO	NO	NO	NO
1000808	Alternative 3’ splice site	BnaA04g27290D	20018	20671	-	NO	NO	Yes	NO	NO	NO
1000809	Alternative 3’ splice site	BnaA04g27290D	20018	20489	-	NO	NO	Yes	NO	NO	NO
1000810	Alternative 3’ splice site	BnaA04g27290D	20018	20359	-	NO	NO	Yes	NO	NO	NO
1000811	Alternative 3’ splice site	BnaA04g27290D	20033	20489	-	NO	Yes	NO	NO	NO	NO
1000812	Alternative 3’ splice site	BnaA04g27290D	20033	20454	-	NO	Yes	NO	NO	NO	NO
1000813	Alternative 3’ splice site	BnaA04g27290D	20033	20671	-	NO	Yes	NO	NO	NO	NO
1000814	Alternative 3’ splice site	BnaA04g27290D	20057	20489	-	NO	NO	NO	Yes	NO	NO
1000815	Alternative 3’ splice site	BnaA04g27290D	20075	20489	-	NO	NO	NO	NO	NO	Yes
1000816	Alternative 3’ splice site	BnaA04g27290D	20075	20671	-	NO	NO	NO	NO	NO	Yes
1000817	Alternative 3’ splice site	BnaA04g27290D	20075	20359	-	NO	NO	NO	NO	NO	Yes
1000818	Alternative 3’ splice site	BnaA04g27290D	20094	20489	-	NO	NO	NO	NO	Yes	NO
1000819	Alternative 3’ splice site	BnaA04g27290D	20094	20671	-	NO	NO	NO	NO	Yes	NO
1000820	Alternative 3’ splice site	BnaA04g27290D	20094	20359	-	NO	NO	NO	NO	Yes	NO
1000821	Alternative 3’ splice site	BnaA06g00040D	20332	20793	+	Yes	Yes	Yes	Yes	Yes	Yes
1000822	Alternative 3’ splice site	BnaA04g27290D	20398	20454	-	Yes	NO	Yes	Yes	Yes	Yes
1000823	Alternative 3’ splice site	BnaA05g34230D	20491	20586	+	Yes	Yes	Yes	Yes	Yes	Yes
1000824	Alternative 3’ splice site	BnaC01g00070D	20506	20984	-	NO	NO	NO	NO	Yes	NO
1000825	Intron rentition	BnaC04g51770D	20516	20588	+	NO	Yes	NO	NO	NO	NO
1000826	Intron rentition	BnaC04g51770D	20516	20588	+	NO	Yes	NO	NO	NO	NO
1000827	Mutually exclusive exons	BnaA04g27290D	20531	20624	-	Yes	Yes	Yes	Yes	Yes	Yes
1000828	Alternative 3’ splice site	BnaC01g00070D	20537	20984	-	NO	NO	NO	NO	NO	Yes
1000829	Intron rentition	BnaA03g00070D	20545	20625	+	NO	NO	NO	Yes	NO	NO
1000830	Intron rentition	BnaA03g00070D	20545	20625	+	NO	NO	NO	Yes	NO	NO
1000831	Alternative 3’ splice site	BnaC01g00070D	20565	20984	-	NO	Yes	NO	NO	NO	NO
1000832	Alternative 3’ splice site	BnaC01g00070D	20573	20984	-	NO	NO	Yes	NO	NO	NO
1000833	Mutually exclusive exons	BnaA04g27290D	20576	20671	-	Yes	Yes	Yes	Yes	Yes	Yes
1000834	Alternative 3’ splice site	BnaC02g00100D	20603	20905	+	Yes	Yes	Yes	Yes	Yes	Yes
1000835	Alternative 3’ splice site	BnaC01g00070D	20604	20984	-	NO	NO	NO	Yes	NO	NO
1000836	Alternative 3’ splice site	BnaC01g00070D	20614	20984	-	Yes	NO	NO	NO	NO	NO
1000837	Intron rentition	BnaA08g00040D	20619	20927	-	NO	NO	NO	NO	NO	Yes
1000838	Intron rentition	BnaA08g00040D	20619	20927	-	NO	NO	Yes	NO	NO	Yes
1000839	Intron rentition	BnaA08g00040D	20619	20927	-	NO	NO	NO	NO	NO	Yes
1000840	Intron rentition	BnaA08g00040D	20619	20659	-	Yes	Yes	Yes	Yes	Yes	Yes
1000841	Intron rentition	BnaA08g00040D	20619	20927	-	NO	NO	Yes	NO	NO	Yes
1000842	Intron rentition	BnaA08g00040D	20619	20659	-	Yes	Yes	Yes	Yes	Yes	Yes
1000843	Alternative 3’ splice site	BnaC08g00070D	20654	21027	-	Yes	Yes	Yes	Yes	Yes	Yes
1000844	Alternative 3’ splice site	BnaC04g51770D	20781	20997	+	Yes	NO	Yes	NO	NO	NO
1000845	Alternative 3’ splice site	BnaC04g51770D	20781	21231	+	NO	Yes	NO	NO	NO	NO
1000846	Intron rentition	BnaA08g00040D	20852	20927	-	NO	NO	Yes	NO	NO	NO
1000847	Intron rentition	BnaA08g00040D	20852	20927	-	NO	NO	NO	NO	NO	Yes
1000848	Intron rentition	BnaA08g00040D	20852	20927	-	NO	NO	Yes	NO	NO	NO
1000849	Intron rentition	BnaA08g00040D	20852	20927	-	NO	NO	NO	NO	NO	Yes
1000850	Intron rentition	BnaA03g00070D	20908	20981	+	NO	NO	Yes	NO	NO	NO
1000851	Intron rentition	BnaA03g00070D	20908	20981	+	NO	NO	Yes	NO	NO	NO
1000852	Alternative 5’ splice site	BnaA08g00040D	20927	20978	-	NO	NO	Yes	Yes	NO	Yes
1000853	Mutually exclusive exons	BnaA08g00040D	20927	20978	-	NO	NO	NO	NO	Yes	Yes
1000854	Mutually exclusive exons	BnaA08g00040D	20927	21024	-	NO	NO	NO	NO	Yes	Yes
1000855	Alternative 3’ splice site	BnaC02g00110D	20992	21746	-	Yes	Yes	Yes	Yes	Yes	Yes
1000856	Alternative 5’ splice site	BnaA07g00040D	21055	21605	+	Yes	Yes	Yes	Yes	Yes	Yes
1000857	Mutually exclusive exons	BnaC01g00070D	21105	21268	-	Yes	Yes	Yes	Yes	Yes	Yes
1000858	Mutually exclusive exons	BnaC01g00070D	21138	21268	-	Yes	Yes	Yes	Yes	Yes	Yes
1000859	Mutually exclusive exons	BnaC05g00080D	21161	21249	-	Yes	Yes	Yes	Yes	Yes	Yes
1000860	Mutually exclusive exons	BnaC05g00080D	21161	21222	-	Yes	Yes	Yes	Yes	Yes	Yes
1000861	Alternative 5’ splice site	BnaA08g00040D	21203	21289	-	Yes	NO	NO	NO	NO	NO
1000862	Alternative 5’ splice site	BnaA08g00040D	21203	21255	-	NO	NO	Yes	NO	NO	NO
1000863	Alternative 5’ splice site	BnaA08g00040D	21203	21285	-	NO	NO	NO	NO	NO	Yes
1000864	Alternative 5’ splice site	BnaA08g00040D	21203	21291	-	NO	NO	NO	NO	Yes	NO
1000865	Alternative 5’ splice site	BnaA08g00040D	21203	21299	-	NO	Yes	NO	NO	NO	NO
1000866	Alternative 5’ splice site	BnaC04g51780D	21302	21659	+	NO	Yes	Yes	NO	NO	NO
1000867	Alternative 3’ splice site	BnaA06g00050D	21322	22209	-	Yes	Yes	Yes	Yes	Yes	Yes
1000868	Alternative 3’ splice site	BnaA06g00060D	21322	22199	-	NO	Yes	NO	Yes	Yes	Yes
1000869	Alternative 5’ splice site	BnaC04g51780D	21338	21659	+	Yes	NO	NO	NO	NO	NO
1000870	Alternative 5’ splice site	BnaC03g71180D	21348	21368	-	Yes	Yes	Yes	Yes	Yes	Yes
1000871	Alternative 3’ splice site	BnaUnng00040D	21356	21824	-	NO	NO	NO	NO	Yes	NO
1000872	Alternative 3’ splice site	BnaUnng00040D	21358	21824	-	NO	NO	NO	Yes	NO	NO
1000873	Alternative 3’ splice site	BnaUnng00040D	21365	21824	-	NO	NO	NO	NO	NO	Yes
1000874	Alternative 3’ splice site	BnaUnng00040D	21366	21824	-	Yes	NO	NO	NO	NO	NO
1000875	Alternative 3’ splice site	BnaA06g00060D	21383	22199	-	NO	NO	Yes	NO	NO	NO
1000876	Alternative 3’ splice site	BnaUnng00040D	21399	21824	-	NO	NO	Yes	NO	NO	NO
1000877	Alternative 5’ splice site	BnaA08g00050D	21432	21874	+	Yes	Yes	Yes	Yes	Yes	Yes
1000878	Alternative 3’ splice site	BnaUnng00040D	21437	21824	-	NO	Yes	NO	NO	NO	NO
1000879	Alternative 3’ splice site	BnaA03g00070D	21440	21941	+	NO	NO	NO	Yes	NO	NO
1000880	Alternative 3’ splice site	BnaA03g00070D	21440	21889	+	Yes	NO	NO	NO	NO	NO
1000881	Alternative 3’ splice site	BnaA03g00070D	21440	21939	+	NO	NO	Yes	NO	NO	NO
1000882	Alternative 5’ splice site	BnaC02g44120D	21460	21466	-	Yes	Yes	Yes	Yes	Yes	Yes
1000883	Alternative 5’ splice site	BnaA04g00040D	21562	22102	+	Yes	Yes	Yes	Yes	Yes	Yes
1000884	Alternative 5’ splice site	BnaA08g29190D	21652	21907	-	Yes	Yes	Yes	Yes	Yes	Yes
1000885	Intron rentition	BnaA04g27290D	21771	21817	-	Yes	Yes	Yes	NO	Yes	Yes
1000886	Intron rentition	BnaA04g27290D	21771	21817	-	Yes	Yes	Yes	NO	Yes	Yes
1000887	Mutually exclusive exons	BnaC08g00070D	21777	21944	-	NO	NO	NO	NO	Yes	Yes
1000888	Mutually exclusive exons	BnaC08g00070D	21777	21934	-	NO	NO	NO	NO	Yes	Yes
1000889	Intron rentition	BnaA07g00040D	21797	21874	+	NO	NO	NO	Yes	NO	NO
1000890	Intron rentition	BnaA07g00040D	21797	21874	+	NO	NO	NO	Yes	NO	NO
1000891	Alternative 5’ splice site	BnaC02g44130D	21875	22264	+	Yes	Yes	Yes	Yes	Yes	Yes
1000892	Intron rentition	BnaA07g00040D	22051	22122	+	NO	NO	Yes	NO	NO	Yes
1000893	Intron rentition	BnaA07g00040D	22051	22122	+	NO	NO	Yes	NO	NO	Yes
1000894	Alternative 5’ splice site	BnaC05g00080D	22085	22328	-	NO	NO	NO	Yes	NO	NO
1000895	Alternative 5’ splice site	BnaC05g00080D	22085	22329	-	Yes	NO	NO	NO	NO	NO
1000896	Alternative 5’ splice site	BnaC05g00080D	22085	22330	-	NO	NO	NO	NO	NO	Yes
1000897	Alternative 5’ splice site	BnaC05g00080D	22085	22267	-	NO	Yes	NO	NO	NO	NO
1000898	Alternative 5’ splice site	BnaC05g00080D	22085	22336	-	NO	NO	NO	NO	Yes	NO
1000899	Alternative 5’ splice site	BnaC05g00080D	22085	22334	-	NO	NO	Yes	NO	NO	NO
1000900	Alternative 3’ splice site	BnaC04g00080D	22108	22851	-	NO	Yes	Yes	Yes	Yes	NO
1000901	Alternative 3’ splice site	BnaC04g00080D	22186	22851	-	Yes	NO	NO	NO	NO	NO
1000902	Alternative 5’ splice site	BnaA03g00080D	22201	22257	+	Yes	Yes	Yes	Yes	NO	Yes
1000903	Alternative 3’ splice site	BnaA04g00040D	22210	22559	+	Yes	Yes	Yes	Yes	Yes	Yes
1000904	Cassette exon	BnaUnng00040D	22230	22262	-	Yes	Yes	Yes	Yes	Yes	Yes
1000905	Cassette exon	BnaUnng00040D	22230	22262	-	Yes	Yes	Yes	Yes	Yes	Yes
1000906	Mutually exclusive exons	BnaA04g27290D	22233	22457	-	Yes	Yes	Yes	NO	Yes	Yes
1000907	Alternative 3’ splice site	BnaC04g00080D	22261	22851	-	NO	NO	NO	NO	NO	Yes
1000908	Alternative 5’ splice site	BnaA06g00050D	22293	22305	-	Yes	Yes	Yes	Yes	Yes	Yes
1000909	Mutually exclusive exons	BnaA04g27290D	22316	22457	-	Yes	Yes	Yes	NO	Yes	Yes
1000910	Alternative 3’ splice site	BnaCnng00020D	22332	22469	+	Yes	NO	NO	NO	NO	NO
1000911	Alternative 3’ splice site	BnaC06g00020D	22353	22724	-	NO	NO	NO	Yes	NO	NO
1000912	Alternative 5’ splice site	BnaA01g34520D	22367	22540	+	Yes	Yes	Yes	Yes	Yes	Yes
1000913	Alternative 3’ splice site	BnaC06g00020D	22388	22724	-	Yes	NO	NO	NO	NO	Yes
1000914	Alternative 3’ splice site	BnaC06g00020D	22392	22724	-	NO	NO	NO	NO	Yes	NO
1000915	Alternative 3’ splice site	BnaC06g00020D	22394	22721	-	NO	NO	Yes	NO	NO	NO
1000916	Alternative 3’ splice site	BnaC06g00020D	22428	22724	-	NO	Yes	NO	NO	NO	NO
1000917	Intron rentition	BnaA07g00040D	22469	22549	+	NO	NO	NO	NO	Yes	NO
1000918	Intron rentition	BnaA07g00040D	22469	22549	+	NO	NO	NO	NO	Yes	NO
1000919	Intron rentition	BnaA08g00050D	22489	22583	+	NO	NO	NO	NO	NO	Yes
1000920	Intron rentition	BnaA08g00050D	22489	22583	+	NO	NO	NO	NO	NO	Yes
1000921	Alternative 5’ splice site	BnaC05g00090D	22561	22650	+	Yes	Yes	Yes	Yes	Yes	Yes
1000922	Alternative 3’ splice site	BnaC06g00020D	22614	22724	-	NO	NO	Yes	NO	NO	NO
1000923	Alternative 3’ splice site	BnaA06g37480D	22653	22815	-	Yes	Yes	Yes	Yes	Yes	Yes
1000924	Alternative 5’ splice site	BnaC01g00070D	22700	22753	-	Yes	Yes	Yes	Yes	Yes	Yes
1000925	Intron rentition	BnaA01g34520D	22701	22768	+	NO	NO	NO	Yes	NO	NO
1000926	Intron rentition	BnaA01g34520D	22701	22768	+	NO	NO	NO	Yes	NO	NO
1000927	Alternative 3’ splice site	BnaA06g00060D	22767	23171	-	Yes	NO	NO	NO	NO	NO
1000928	Alternative 5’ splice site	BnaC08g00070D	22774	23054	-	Yes	Yes	Yes	Yes	Yes	Yes
1000929	Alternative 5’ splice site	BnaC07g47750D	22926	23096	+	Yes	Yes	Yes	Yes	Yes	Yes
1000930	Alternative 5’ splice site	BnaUnng00040D	22934	23044	-	Yes	Yes	Yes	Yes	Yes	Yes
1000931	Alternative 3’ splice site	BnaA08g00050D	22993	23128	+	NO	NO	NO	NO	NO	Yes
1000932	Alternative 3’ splice site	BnaA08g00050D	22993	23597	+	Yes	Yes	Yes	Yes	Yes	NO
1000933	Alternative 3’ splice site	BnaC04g51780D	23001	23021	+	NO	NO	NO	NO	Yes	NO
1000934	Alternative 3’ splice site	BnaC08g00080D	23140	23189	-	Yes	Yes	Yes	Yes	Yes	Yes
1000935	Alternative 5’ splice site	BnaAnng00030D	23145	23535	+	NO	NO	NO	NO	Yes	NO
1000936	Alternative 5’ splice site	BnaAnng00030D	23146	23535	+	NO	Yes	NO	NO	NO	NO
1000937	Alternative 5’ splice site	BnaA06g37480D	23164	23354	-	Yes	Yes	Yes	Yes	Yes	Yes
1000938	Alternative 3’ splice site	BnaA07g00040D	23207	23400	+	Yes	Yes	Yes	Yes	Yes	Yes
1000939	Alternative 5’ splice site	BnaAnng00030D	23208	23535	+	Yes	NO	Yes	Yes	NO	Yes
1000940	Alternative 3’ splice site	BnaC08g00080D	23220	23693	-	NO	NO	NO	NO	NO	Yes
1000941	Alternative 3’ splice site	BnaC05g00090D	23239	23313	+	Yes	Yes	Yes	Yes	Yes	Yes
1000942	Alternative 3’ splice site	BnaC08g00080D	23254	23693	-	NO	Yes	NO	NO	NO	NO
1000943	Alternative 3’ splice site	BnaA02g00040D	23259	23317	+	Yes	Yes	Yes	Yes	Yes	Yes
1000944	Alternative 5’ splice site	BnaC02g00110D	23295	23363	-	Yes	Yes	Yes	Yes	Yes	Yes
1000945	Mutually exclusive exons	BnaC06g00020D	23380	23488	-	NO	NO	Yes	NO	NO	NO
1000946	Mutually exclusive exons	BnaC06g00020D	23380	23453	-	NO	NO	Yes	NO	NO	NO
1000947	Alternative 3’ splice site	BnaC02g00120D	23420	23614	-	Yes	Yes	Yes	Yes	Yes	Yes
1000948	Alternative 5’ splice site	BnaA02g00050D	23423	23450	+	Yes	Yes	Yes	Yes	Yes	Yes
1000949	Alternative 3’ splice site	BnaC07g47750D	23441	23605	+	Yes	Yes	Yes	Yes	Yes	Yes
1000950	Alternative 3’ splice site	BnaA03g00080D	23637	23644	+	Yes	Yes	Yes	Yes	NO	Yes
1000951	Intron rentition	BnaC04g00080D	23751	23828	-	NO	NO	Yes	NO	NO	NO
1000952	Intron rentition	BnaC04g00080D	23751	23828	-	NO	NO	Yes	NO	NO	NO
1000953	Alternative 3’ splice site	BnaA07g00050D	23778	24139	-	NO	NO	Yes	NO	NO	NO
1000954	Alternative 3’ splice site	BnaA07g00050D	23780	24139	-	NO	NO	NO	NO	NO	Yes
1000955	Alternative 3’ splice site	BnaA07g00050D	23795	24139	-	Yes	NO	NO	NO	NO	NO
1000956	Alternative 3’ splice site	BnaA07g00050D	23800	24139	-	NO	Yes	NO	Yes	Yes	NO
1000957	Alternative 5’ splice site	BnaC05g49000D	23842	24252	+	Yes	Yes	Yes	Yes	Yes	Yes
1000958	Alternative 5’ splice site	BnaAnng00030D	23892	24335	+	NO	NO	NO	Yes	NO	NO
1000959	Alternative 5’ splice site	BnaC08g00080D	23907	23939	-	NO	NO	NO	NO	NO	Yes
1000960	Alternative 5’ splice site	BnaC08g00080D	23907	23969	-	NO	Yes	NO	NO	NO	NO
1000961	Alternative 5’ splice site	BnaC08g00080D	23907	24020	-	Yes	NO	Yes	Yes	Yes	NO
1000962	Alternative 5’ splice site	BnaA03g00090D	23986	24074	+	Yes	Yes	Yes	Yes	NO	Yes
1000963	Alternative 3’ splice site	BnaA02g00050D	24019	24051	+	Yes	Yes	Yes	Yes	Yes	Yes
1000964	Alternative 5’ splice site	BnaA06g37490D	24218	24261	+	Yes	Yes	Yes	Yes	Yes	Yes
1000965	Alternative 5’ splice site	BnaA06g00060D	24246	24352	-	Yes	NO	NO	NO	NO	NO
1000966	Alternative 5’ splice site	BnaC01g00080D	24251	24605	+	NO	NO	Yes	NO	NO	NO
1000967	Alternative 5’ splice site	BnaC01g00080D	24259	24496	+	NO	NO	Yes	NO	NO	NO
1000968	Alternative 5’ splice site	BnaC01g00080D	24266	24605	+	NO	NO	NO	NO	Yes	NO
1000969	Alternative 5’ splice site	BnaC01g00080D	24268	24605	+	Yes	Yes	NO	NO	NO	NO
1000970	Alternative 5’ splice site	BnaC01g00080D	24275	24605	+	NO	NO	NO	Yes	NO	Yes
1000971	Alternative 5’ splice site	BnaC01g00080D	24275	24496	+	Yes	Yes	NO	Yes	Yes	Yes
1000972	Intron rentition	BnaAnng00030D	24335	24410	+	NO	Yes	NO	Yes	Yes	NO
1000973	Intron rentition	BnaAnng00030D	24335	24410	+	NO	Yes	NO	Yes	Yes	NO
1000974	Intron rentition	BnaAnng00030D	24335	24413	+	NO	NO	NO	Yes	NO	NO
1000975	Intron rentition	BnaAnng00030D	24335	24413	+	NO	NO	NO	Yes	NO	NO
1000976	Alternative 5’ splice site	BnaC04g00080D	24342	24692	-	NO	NO	Yes	NO	NO	Yes
1000977	Alternative 5’ splice site	BnaC04g00080D	24342	24697	-	NO	NO	NO	Yes	NO	NO
1000978	Alternative 5’ splice site	BnaC04g00080D	24342	24698	-	NO	NO	NO	NO	Yes	NO
1000979	Alternative 3’ splice site	BnaA06g00070D	24407	24444	-	Yes	Yes	Yes	Yes	Yes	Yes
1000980	Alternative 3’ splice site	BnaA01g34520D	24422	24953	+	Yes	Yes	Yes	Yes	Yes	Yes
1000981	Alternative 3’ splice site	BnaC08g00090D	24469	24651	-	Yes	Yes	Yes	Yes	Yes	Yes
1000982	Alternative 3’ splice site	BnaA07g35960D	24533	24584	-	Yes	Yes	Yes	Yes	Yes	Yes
1000983	Alternative 3’ splice site	BnaC05g49000D	24567	24665	+	Yes	Yes	Yes	Yes	Yes	Yes
1000984	Alternative 3’ splice site	BnaC02g44130D	24598	24680	+	Yes	Yes	Yes	Yes	Yes	Yes
1000985	Alternative 5’ splice site	BnaC04g00080D	24605	24698	-	Yes	Yes	NO	NO	NO	NO
1000986	Alternative 5’ splice site	BnaA10g00010D	24622	24779	+	Yes	Yes	Yes	Yes	Yes	Yes
1000987	Alternative 5’ splice site	BnaA02g34990D	24816	25631	+	Yes	Yes	Yes	Yes	Yes	Yes
1000988	Alternative 3’ splice site	BnaC04g51780D	24821	24970	+	Yes	NO	NO	NO	NO	NO
1000989	Alternative 3’ splice site	BnaC04g51780D	24821	25009	+	NO	NO	Yes	NO	NO	NO
1000990	Alternative 3’ splice site	BnaC04g51780D	24821	25092	+	NO	Yes	NO	NO	Yes	NO
1000991	Alternative 3’ splice site	BnaC04g51780D	24821	24987	+	NO	NO	NO	Yes	NO	NO
1000992	Alternative 3’ splice site	BnaC04g51780D	24821	25004	+	NO	NO	NO	NO	NO	Yes
1000993	Mutually exclusive exons	BnaC06g00020D	24830	24980	-	NO	NO	Yes	Yes	NO	Yes
1000994	Alternative 3’ splice site	BnaA01g34530D	24846	25176	-	NO	Yes	NO	NO	NO	NO
1000995	Intron rentition	BnaC08g00090D	24857	24947	-	NO	NO	Yes	Yes	NO	NO
1000996	Intron rentition	BnaC08g00090D	24857	24947	-	NO	NO	Yes	Yes	NO	NO
1000997	Mutually exclusive exons	BnaC01g00080D	24864	24974	+	NO	NO	NO	NO	Yes	NO
1000998	Mutually exclusive exons	BnaC01g00080D	24864	24899	+	NO	NO	NO	NO	Yes	NO
1000999	Mutually exclusive exons	BnaC06g00020D	24887	24980	-	NO	NO	Yes	Yes	NO	Yes
1001000	Intron rentition	BnaC01g00080D	24899	25118	+	NO	NO	Yes	Yes	NO	NO
1001001	Intron rentition	BnaC01g00080D	24899	25118	+	NO	NO	Yes	Yes	NO	NO
1001002	Alternative 5’ splice site	BnaA01g00080D	24909	25358	+	Yes	Yes	Yes	Yes	Yes	Yes
1001003	Alternative 5’ splice site	BnaC02g00120D	24943	25154	-	Yes	Yes	Yes	Yes	Yes	Yes
1001004	Alternative 3’ splice site	BnaA09g00060D	24956	25195	-	Yes	Yes	Yes	Yes	Yes	Yes
1001005	Alternative 5’ splice site	BnaA04g27290D	24959	24992	-	Yes	Yes	Yes	Yes	Yes	Yes
1001006	Alternative 3’ splice site	BnaA10g00010D	24970	25559	+	Yes	Yes	Yes	Yes	Yes	Yes
1001007	Alternative 5’ splice site	BnaC05g49010D	25023	25162	+	Yes	Yes	Yes	Yes	Yes	Yes
1001008	Alternative 5’ splice site	BnaA02g00060D	25052	25235	+	Yes	Yes	Yes	Yes	Yes	Yes
1001009	Alternative 3’ splice site	BnaA01g34530D	25053	25176	-	Yes	NO	Yes	Yes	Yes	Yes
1001010	Alternative 5’ splice site	BnaA06g00070D	25067	25253	-	Yes	Yes	Yes	Yes	Yes	Yes
1001011	Alternative 5’ splice site	BnaA06g00060D	25072	25466	-	NO	Yes	NO	NO	NO	NO
1001012	Alternative 5’ splice site	BnaA06g00060D	25072	25459	-	NO	NO	NO	Yes	NO	NO
1001013	Alternative 5’ splice site	BnaA06g00060D	25072	25447	-	NO	NO	Yes	NO	NO	NO
1001014	Alternative 5’ splice site	BnaA06g00060D	25072	25343	-	NO	NO	NO	NO	NO	Yes
1001015	Alternative 5’ splice site	BnaA06g00060D	25072	25410	-	NO	NO	NO	NO	Yes	NO
1001016	Alternative 3’ splice site	BnaA06g37490D	25085	25658	+	Yes	Yes	Yes	Yes	Yes	Yes
1001017	Alternative 5’ splice site	BnaA07g00050D	25098	26100	-	NO	NO	NO	Yes	Yes	NO
1001018	Alternative 5’ splice site	BnaA07g35960D	25177	25522	-	Yes	Yes	Yes	Yes	Yes	Yes
1001019	Alternative 3’ splice site	BnaA03g00070D	25187	26175	+	NO	NO	NO	NO	Yes	NO
1001020	Alternative 3’ splice site	BnaA03g00090D	25187	25628	+	Yes	Yes	Yes	Yes	NO	Yes
1001021	Alternative 5’ splice site	BnaC04g51790D	25258	25268	+	Yes	Yes	Yes	Yes	Yes	Yes
1001022	Alternative 5’ splice site	BnaC04g51800D	25278	25346	+	NO	NO	NO	NO	NO	Yes
1001023	Alternative 3’ splice site	BnaC05g49010D	25290	25575	+	Yes	Yes	Yes	Yes	Yes	Yes
1001024	Alternative 5’ splice site	BnaC04g51800D	25298	25346	+	NO	NO	Yes	NO	NO	NO
1001025	Alternative 5’ splice site	BnaC04g51800D	25368	25388	+	NO	Yes	NO	NO	NO	NO
1001026	Alternative 5’ splice site	BnaC04g51800D	25370	25423	+	NO	NO	NO	NO	NO	Yes
1001027	Alternative 5’ splice site	BnaC04g51800D	25372	25423	+	NO	NO	NO	Yes	NO	NO
1001028	Alternative 5’ splice site	BnaC04g51800D	25377	25423	+	NO	NO	Yes	NO	NO	NO
1001029	Alternative 5’ splice site	BnaC04g51800D	25379	25423	+	NO	NO	NO	NO	Yes	NO
1001030	Alternative 5’ splice site	BnaA07g00050D	25392	26100	-	Yes	Yes	Yes	NO	NO	Yes
1001031	Alternative 5’ splice site	BnaC04g51800D	25392	25423	+	NO	Yes	NO	NO	NO	NO
1001032	Alternative 3’ splice site	BnaC01g00080D	25400	25669	+	NO	NO	Yes	NO	NO	NO
1001033	Alternative 3’ splice site	BnaC01g00080D	25400	25442	+	Yes	Yes	NO	Yes	Yes	Yes
1001034	Alternative 5’ splice site	BnaC04g51800D	25498	25622	+	Yes	NO	NO	NO	NO	NO
1001035	Intron rentition	BnaC06g00020D	25514	25592	-	NO	NO	NO	NO	NO	Yes
1001036	Intron rentition	BnaC06g00020D	25514	25592	-	NO	NO	NO	NO	NO	Yes
1001037	Alternative 3’ splice site	BnaA01g00080D	25515	26325	+	Yes	Yes	NO	NO	NO	NO
1001038	Alternative 3’ splice site	BnaA01g00080D	25515	25673	+	NO	NO	NO	Yes	Yes	Yes
1001039	Alternative 3’ splice site	BnaA01g00080D	25515	26328	+	NO	NO	Yes	NO	NO	NO
1001040	Intron rentition	BnaC08g00090D	25670	25762	-	Yes	NO	NO	NO	NO	NO
1001041	Intron rentition	BnaC08g00090D	25670	25762	-	Yes	NO	NO	NO	NO	NO
1001042	Alternative 3’ splice site	BnaA02g34990D	25671	26477	+	Yes	Yes	Yes	Yes	Yes	Yes
1001043	Intron rentition	BnaC08g00090D	25675	25762	-	Yes	NO	NO	NO	NO	NO
1001044	Intron rentition	BnaC08g00090D	25675	25762	-	Yes	NO	NO	NO	NO	NO
1001045	Alternative 3’ splice site	BnaC04g51790D	25735	25854	+	Yes	Yes	Yes	Yes	Yes	Yes
1001046	Mutually exclusive exons	BnaC04g51800D	25735	25857	+	NO	NO	NO	NO	NO	Yes
1001047	Mutually exclusive exons	BnaC04g51800D	25735	25898	+	NO	NO	NO	NO	NO	Yes
1001048	Alternative 5’ splice site	BnaA01g34530D	25838	26431	-	Yes	Yes	Yes	Yes	Yes	Yes
1001049	Alternative 3’ splice site	BnaA02g00060D	25852	25940	+	Yes	Yes	Yes	Yes	Yes	Yes
1001050	Intron rentition	BnaC04g51800D	25857	26010	+	NO	NO	NO	NO	Yes	NO
1001051	Intron rentition	BnaC04g51800D	25857	26010	+	NO	NO	NO	NO	Yes	NO
1001052	Alternative 3’ splice site	BnaC09g50870D	25858	26076	-	Yes	Yes	Yes	Yes	Yes	Yes
1001053	Alternative 3’ splice site	BnaC05g49020D	25886	26690	-	NO	NO	Yes	NO	NO	NO
1001054	Alternative 3’ splice site	BnaC05g49020D	25887	26690	-	NO	NO	NO	Yes	NO	NO
1001055	Alternative 3’ splice site	BnaC05g49020D	25889	26690	-	NO	NO	NO	NO	NO	Yes
1001056	Alternative 3’ splice site	BnaA03g00100D	25891	26339	-	NO	NO	NO	Yes	NO	NO
1001057	Alternative 3’ splice site	BnaA03g00100D	25892	26339	-	Yes	NO	NO	NO	NO	NO
1001058	Alternative 3’ splice site	BnaC05g49020D	25903	26690	-	NO	NO	NO	NO	Yes	NO
1001059	Alternative 3’ splice site	BnaA03g00100D	25926	26339	-	NO	NO	NO	NO	NO	Yes
1001060	Alternative 3’ splice site	BnaA03g00100D	25928	26339	-	NO	Yes	NO	NO	NO	NO
1001061	Alternative 3’ splice site	BnaC05g49020D	25929	26690	-	NO	Yes	NO	NO	NO	NO
1001062	Alternative 3’ splice site	BnaC05g49020D	25969	26690	-	Yes	NO	NO	NO	NO	NO
1001063	Alternative 5’ splice site	BnaA02g00070D	25996	26027	+	Yes	Yes	Yes	Yes	Yes	Yes
1001064	Alternative 3’ splice site	BnaA03g00100D	26032	26382	-	Yes	Yes	Yes	Yes	Yes	Yes
1001065	Alternative 5’ splice site	BnaC03g71190D	26070	26411	+	Yes	Yes	Yes	Yes	Yes	Yes
1001066	Alternative 3’ splice site	BnaAnng00030D	26137	26232	+	Yes	NO	Yes	Yes	NO	Yes
1001067	Alternative 3’ splice site	BnaAnng00030D	26137	26475	+	NO	NO	NO	NO	Yes	NO
1001068	Alternative 3’ splice site	BnaAnng00030D	26137	26449	+	NO	Yes	NO	NO	NO	NO
1001069	Intron rentition	BnaC04g51800D	26228	26318	+	NO	NO	NO	NO	Yes	NO
1001070	Intron rentition	BnaC04g51800D	26228	26318	+	NO	NO	NO	NO	Yes	NO
1001071	Alternative 3’ splice site	BnaA10g00020D	26318	26586	-	Yes	Yes	Yes	Yes	Yes	Yes
1001072	Alternative 5’ splice site	BnaA03g00100D	26451	27518	-	Yes	Yes	Yes	Yes	Yes	Yes
1001073	Intron rentition	BnaC08g00090D	26460	26549	-	NO	NO	Yes	NO	NO	NO
1001074	Intron rentition	BnaC08g00090D	26460	26549	-	NO	NO	Yes	NO	NO	NO
1001075	Alternative 3’ splice site	BnaC01g00090D	26513	26845	-	Yes	Yes	Yes	Yes	Yes	Yes
1001076	Alternative 3’ splice site	BnaA06g37500D	26585	27393	-	NO	Yes	NO	Yes	NO	NO
1001077	Alternative 3’ splice site	BnaA06g37500D	26586	27393	-	NO	NO	Yes	NO	NO	NO
1001078	Alternative 3’ splice site	BnaA06g37500D	26587	27393	-	NO	NO	NO	NO	Yes	NO
1001079	Alternative 3’ splice site	BnaA06g37500D	26588	27393	-	Yes	NO	NO	NO	NO	NO
1001080	Alternative 3’ splice site	BnaA06g37500D	26589	27393	-	NO	NO	NO	NO	NO	Yes
1001081	Alternative 3’ splice site	BnaA02g35000D	26662	27203	-	NO	Yes	NO	NO	NO	NO
1001082	Alternative 3’ splice site	BnaA02g35000D	26662	27194	-	NO	NO	Yes	NO	NO	NO
1001083	Intron rentition	BnaC08g00090D	26726	26802	-	NO	NO	NO	Yes	NO	NO
1001084	Intron rentition	BnaC08g00090D	26726	26847	-	NO	NO	NO	Yes	NO	NO
1001085	Intron rentition	BnaC08g00090D	26726	26802	-	NO	NO	NO	Yes	NO	NO
1001086	Intron rentition	BnaC08g00090D	26726	26847	-	NO	NO	NO	Yes	NO	NO
1001087	Alternative 3’ splice site	BnaA02g35000D	26756	27203	-	NO	NO	NO	NO	Yes	NO
1001088	Alternative 3’ splice site	BnaA02g35000D	26765	27203	-	NO	NO	NO	NO	NO	Yes
1001089	Alternative 3’ splice site	BnaA02g35000D	26780	27203	-	NO	NO	NO	Yes	NO	NO
1001090	Mutually exclusive exons	BnaC08g00090D	26802	26875	-	Yes	Yes	NO	Yes	Yes	Yes
1001091	Alternative 3’ splice site	BnaA02g35000D	26834	27203	-	Yes	NO	NO	NO	NO	NO
1001092	Alternative 3’ splice site	BnaC03g71190D	26845	27192	+	Yes	Yes	Yes	Yes	Yes	Yes
1001093	Mutually exclusive exons	BnaC08g00090D	26847	26869	-	Yes	Yes	NO	Yes	Yes	Yes
1001094	Intron rentition	BnaC08g00090D	26869	26946	-	NO	NO	Yes	NO	NO	NO
1001095	Intron rentition	BnaC08g00090D	26869	26946	-	NO	NO	Yes	NO	NO	NO
1001096	Alternative 5’ splice site	BnaA10g00020D	26884	26980	-	Yes	Yes	Yes	Yes	Yes	Yes
1001097	Alternative 5’ splice site	BnaA01g00090D	26915	27434	+	Yes	Yes	Yes	Yes	Yes	Yes
1001098	Alternative 5’ splice site	BnaC05g49020D	26994	27063	-	Yes	NO	NO	NO	Yes	NO
1001099	Alternative 5’ splice site	BnaC05g49020D	26994	27076	-	NO	NO	NO	NO	NO	Yes
1001100	Alternative 5’ splice site	BnaC05g49020D	26994	27084	-	NO	Yes	NO	Yes	NO	NO
1001101	Alternative 5’ splice site	BnaC05g49020D	26994	27078	-	NO	NO	Yes	NO	NO	NO
1001102	Alternative 5’ splice site	BnaC05g49020D	27050	27063	-	NO	NO	NO	NO	Yes	NO
1001103	Alternative 3’ splice site	BnaA10g00030D	27057	28396	-	Yes	Yes	Yes	Yes	Yes	Yes
1001104	Alternative 5’ splice site	BnaC08g00090D	27067	27129	-	Yes	Yes	Yes	Yes	Yes	Yes
1001105	Intron rentition	BnaC04g51800D	27088	27228	+	NO	Yes	NO	NO	NO	NO
1001106	Intron rentition	BnaC04g51800D	27088	27228	+	NO	Yes	NO	NO	NO	NO
1001107	Intron rentition	BnaC04g51800D	27198	27228	+	NO	NO	Yes	NO	NO	Yes
1001108	Intron rentition	BnaC04g51800D	27198	27228	+	NO	NO	Yes	NO	NO	Yes
1001109	Alternative 5’ splice site	BnaA06g00080D	27224	27802	+	Yes	Yes	Yes	Yes	Yes	Yes
1001110	Alternative 5’ splice site	BnaA06g00080D	27224	27450	+	NO	NO	Yes	NO	Yes	NO
1001111	Alternative 5’ splice site	BnaA06g00080D	27224	27797	+	Yes	Yes	Yes	Yes	Yes	Yes
1001112	Alternative 5’ splice site	BnaC05g49020D	27311	27732	-	Yes	Yes	Yes	Yes	Yes	Yes
1001113	Alternative 3’ splice site	BnaA02g00070D	27323	27472	+	Yes	Yes	Yes	Yes	Yes	Yes
1001114	Alternative 3’ splice site	BnaA01g34540D	27345	27483	-	Yes	Yes	Yes	Yes	Yes	Yes
1001115	Alternative 5’ splice site	BnaAnng00040D	27356	29291	+	NO	NO	NO	NO	NO	Yes
1001116	Alternative 5’ splice site	BnaAnng00040D	27422	29291	+	NO	Yes	NO	NO	NO	NO
1001117	Alternative 5’ splice site	BnaAnng00040D	27422	27761	+	NO	Yes	NO	NO	NO	NO
1001118	Alternative 5’ splice site	BnaAnng00040D	27449	29291	+	NO	NO	NO	NO	Yes	NO
1001119	Alternative 5’ splice site	BnaAnng00040D	27484	29291	+	NO	NO	Yes	NO	NO	NO
1001120	Alternative 5’ splice site	BnaA02g00080D	27566	27669	+	Yes	Yes	Yes	Yes	Yes	Yes
1001121	Alternative 3’ splice site	BnaA07g00060D	27567	28031	-	NO	NO	NO	NO	NO	Yes
1001122	Alternative 3’ splice site	BnaA07g00060D	27676	28031	-	NO	NO	Yes	NO	NO	NO
1001123	Alternative 3’ splice site	BnaC04g51800D	27688	27774	+	Yes	Yes	Yes	Yes	Yes	Yes
1001124	Alternative 3’ splice site	BnaA07g00060D	27700	28031	-	Yes	Yes	NO	Yes	Yes	NO
1001125	Mutually exclusive exons	BnaC06g00020D	27758	27825	-	NO	Yes	Yes	NO	Yes	Yes
1001126	Mutually exclusive exons	BnaC06g00020D	27758	27808	-	NO	Yes	Yes	NO	Yes	Yes
1001127	Alternative 3’ splice site	BnaA05g00070D	27812	28164	-	NO	NO	Yes	NO	NO	NO
1001128	Alternative 5’ splice site	BnaC05g49040D	27854	28251	+	Yes	NO	NO	NO	NO	NO
1001129	Alternative 5’ splice site	BnaAnng00040D	27889	28191	+	Yes	Yes	Yes	Yes	Yes	Yes
1001130	Alternative 3’ splice site	BnaA02g00080D	27895	28137	+	Yes	Yes	Yes	Yes	Yes	Yes
1001131	Cassette exon	BnaA06g00080D	27898	28180	+	Yes	Yes	Yes	Yes	Yes	Yes
1001132	Cassette exon	BnaA06g00080D	27898	28180	+	Yes	Yes	Yes	Yes	Yes	Yes
1001133	Alternative 5’ splice site	BnaC05g49030D	27932	28251	+	NO	NO	NO	NO	NO	Yes
1001134	Alternative 3’ splice site	BnaA05g00070D	27975	28164	-	NO	NO	NO	Yes	NO	NO
1001135	Alternative 3’ splice site	BnaA05g00070D	27985	28164	-	NO	Yes	NO	NO	NO	NO
1001136	Alternative 5’ splice site	BnaC05g49040D	27988	28251	+	NO	NO	Yes	NO	NO	NO
1001137	Alternative 5’ splice site	BnaC05g49040D	27993	28251	+	NO	NO	NO	Yes	NO	NO
1001138	Alternative 3’ splice site	BnaA05g00070D	27996	28164	-	NO	NO	NO	NO	NO	Yes
1001139	Alternative 3’ splice site	BnaA05g00070D	27997	28164	-	Yes	NO	NO	NO	NO	NO
1001140	Alternative 5’ splice site	BnaC05g49030D	28037	28251	+	NO	Yes	NO	NO	Yes	NO
1001141	Mutually exclusive exons	BnaA06g37500D	28038	28097	-	NO	NO	Yes	NO	NO	NO
1001142	Mutually exclusive exons	BnaA06g37500D	28038	28085	-	NO	NO	Yes	NO	NO	NO
1001143	Alternative 3’ splice site	BnaA05g00070D	28069	28164	-	NO	NO	NO	NO	Yes	NO
1001144	Alternative 5’ splice site	BnaA09g00060D	28074	28147	-	Yes	Yes	Yes	Yes	Yes	Yes
1001145	Mutually exclusive exons	BnaA07g00060D	28112	28453	-	NO	NO	NO	NO	NO	Yes
1001146	Mutually exclusive exons	BnaA07g00060D	28112	28475	-	NO	NO	NO	NO	NO	Yes
1001147	Cassette exon	BnaA06g37500D	28165	28604	-	NO	NO	NO	NO	NO	Yes
1001148	Cassette exon	BnaA06g37500D	28165	28604	-	NO	NO	NO	NO	NO	Yes
1001149	Intron rentition	BnaAnng00040D	28191	28258	+	NO	Yes	NO	NO	NO	NO
1001150	Intron rentition	BnaAnng00040D	28191	28258	+	NO	Yes	NO	NO	NO	NO
1001151	Alternative 3’ splice site	BnaA02g00090D	28222	28314	-	Yes	Yes	Yes	Yes	Yes	Yes
1001152	Alternative 5’ splice site	BnaA09g00070D	28335	28632	+	Yes	Yes	Yes	Yes	Yes	Yes
1001153	Intron rentition	BnaA06g37500D	28340	28426	-	Yes	NO	NO	NO	Yes	NO
1001154	Intron rentition	BnaA06g37500D	28340	28426	-	Yes	NO	NO	NO	Yes	NO
1001155	Alternative 5’ splice site	BnaC01g00090D	28402	28809	-	Yes	Yes	Yes	Yes	Yes	Yes
1001156	Alternative 5’ splice site	BnaA03g00110D	28416	28472	+	Yes	Yes	Yes	Yes	Yes	NO
1001157	Mutually exclusive exons	BnaA06g37500D	28426	28473	-	NO	Yes	NO	NO	NO	NO
1001158	Mutually exclusive exons	BnaA06g37500D	28438	28473	-	NO	Yes	NO	NO	NO	NO
1001159	Alternative 5’ splice site	BnaA04g27300D	28465	28716	+	Yes	Yes	Yes	Yes	Yes	Yes
1001160	Alternative 5’ splice site	BnaA10g00030D	28475	28881	-	Yes	Yes	Yes	Yes	Yes	Yes
1001161	Alternative 5’ splice site	BnaC06g00020D	28590	28835	-	NO	Yes	NO	NO	NO	NO
1001162	Alternative 5’ splice site	BnaC06g00020D	28590	28764	-	Yes	NO	Yes	Yes	Yes	Yes
1001163	Alternative 5’ splice site	BnaC09g50870D	28595	28703	-	Yes	Yes	Yes	Yes	Yes	Yes
1001164	Alternative 5’ splice site	BnaC06g00020D	28606	28835	-	NO	Yes	NO	NO	NO	NO
1001165	Alternative 3’ splice site	BnaCnng00030D	28647	28820	-	Yes	Yes	Yes	Yes	Yes	Yes
1001166	Intron rentition	BnaA02g35000D	28752	28836	-	NO	NO	NO	NO	Yes	NO
1001167	Intron rentition	BnaA02g35000D	28752	28836	-	NO	NO	NO	NO	Yes	NO
1001168	Mutually exclusive exons	BnaA05g00070D	28779	28889	-	NO	Yes	NO	NO	NO	NO
1001169	Mutually exclusive exons	BnaA05g00070D	28779	28874	-	NO	Yes	NO	NO	NO	NO
1001170	Alternative 3’ splice site	BnaA08g00060D	28809	29439	-	Yes	Yes	Yes	Yes	Yes	Yes
1001171	Mutually exclusive exons	BnaA02g35000D	28836	28941	-	NO	NO	NO	NO	NO	Yes
1001172	Mutually exclusive exons	BnaA02g35000D	28836	28981	-	NO	NO	NO	NO	NO	Yes
1001173	Alternative 5’ splice site	BnaCnng00030D	28901	29080	-	Yes	Yes	Yes	Yes	Yes	Yes
1001174	Alternative 5’ splice site	BnaA01g34540D	28931	29581	-	Yes	Yes	Yes	Yes	Yes	Yes
1001175	Alternative 3’ splice site	BnaA10g00040D	28947	29226	-	NO	NO	NO	NO	NO	Yes
1001176	Alternative 3’ splice site	BnaA10g00040D	28959	29226	-	NO	NO	NO	Yes	NO	NO
1001177	Alternative 3’ splice site	BnaA10g00040D	28975	29226	-	NO	Yes	NO	NO	NO	NO
1001178	Alternative 3’ splice site	BnaA10g00040D	29003	29226	-	NO	NO	NO	NO	Yes	NO
1001179	Alternative 5’ splice site	BnaC04g51810D	29071	29093	+	Yes	NO	NO	NO	NO	NO
1001180	Mutually exclusive exons	BnaA06g00080D	29074	29262	+	NO	NO	NO	Yes	Yes	NO
1001181	Mutually exclusive exons	BnaA06g00080D	29074	29262	+	NO	NO	NO	Yes	Yes	NO
1001182	Mutually exclusive exons	BnaA06g00080D	29074	29160	+	NO	NO	NO	Yes	Yes	NO
1001183	Mutually exclusive exons	BnaA06g00080D	29074	29160	+	NO	NO	NO	Yes	Yes	NO
1001184	Alternative 3’ splice site	BnaA10g00040D	29127	29226	-	Yes	NO	NO	NO	NO	NO
1001185	Alternative 5’ splice site	BnaC04g51810D	29136	29287	+	NO	NO	Yes	NO	NO	NO
1001186	Alternative 3’ splice site	BnaA07g35970D	29144	29466	-	NO	NO	NO	NO	Yes	NO
1001187	Alternative 3’ splice site	BnaA10g00040D	29149	29226	-	NO	NO	Yes	NO	NO	NO
1001188	Intron rentition	BnaA02g35000D	29153	29238	-	NO	NO	NO	Yes	NO	NO
1001189	Intron rentition	BnaA02g35000D	29153	29238	-	NO	NO	NO	Yes	NO	NO
1001190	Alternative 5’ splice site	BnaC04g51810D	29164	29287	+	NO	NO	NO	NO	NO	Yes
1001191	Alternative 3’ splice site	BnaA07g35970D	29167	29466	-	NO	NO	Yes	NO	NO	NO
1001192	Alternative 3’ splice site	BnaA07g35970D	29167	29580	-	NO	NO	Yes	NO	NO	NO
1001193	Alternative 5’ splice site	BnaA07g00060D	29187	30563	-	NO	NO	NO	NO	Yes	NO
1001194	Mutually exclusive exons	BnaA07g00060D	29187	29585	-	Yes	NO	NO	Yes	NO	Yes
1001195	Alternative 3’ splice site	BnaA01g00090D	29191	29919	+	Yes	Yes	Yes	Yes	Yes	Yes
1001196	Alternative 5’ splice site	BnaC04g51810D	29196	29287	+	NO	Yes	NO	NO	NO	NO
1001197	Alternative 3’ splice site	BnaC05g49030D	29196	29340	+	NO	Yes	NO	NO	Yes	Yes
1001198	Alternative 5’ splice site	BnaC04g51810D	29204	29287	+	NO	NO	NO	NO	Yes	NO
1001199	Mutually exclusive exons	BnaA07g00060D	29211	29910	-	Yes	NO	NO	NO	NO	Yes
1001200	Mutually exclusive exons	BnaA07g00060D	29211	29585	-	Yes	NO	NO	NO	NO	Yes
1001201	Mutually exclusive exons	BnaA07g00060D	29211	29585	-	Yes	NO	NO	Yes	NO	Yes
1001202	Alternative 5’ splice site	BnaC04g51810D	29214	29287	+	NO	NO	NO	Yes	NO	NO
1001203	Alternative 3’ splice site	BnaC05g49030D	29258	29616	+	NO	NO	NO	NO	NO	Yes
1001204	Alternative 3’ splice site	BnaA07g35970D	29286	29580	-	NO	NO	NO	Yes	NO	NO
1001205	Alternative 3’ splice site	BnaA07g35970D	29337	29466	-	NO	NO	NO	NO	NO	Yes
1001206	Alternative 3’ splice site	BnaA07g35970D	29337	29580	-	NO	NO	NO	NO	NO	Yes
1001207	Alternative 3’ splice site	BnaAnng00040D	29368	30817	+	Yes	NO	NO	Yes	NO	NO
1001208	Alternative 3’ splice site	BnaAnng00040D	29368	31064	+	NO	Yes	NO	NO	NO	NO
1001209	Alternative 3’ splice site	BnaAnng00040D	29368	31069	+	NO	NO	Yes	NO	NO	NO
1001210	Alternative 3’ splice site	BnaAnng00040D	29368	31066	+	NO	NO	NO	NO	Yes	NO
1001211	Alternative 3’ splice site	BnaAnng00040D	29368	31030	+	NO	NO	NO	NO	NO	Yes
1001212	Alternative 3’ splice site	BnaA03g00070D	29382	29570	+	NO	Yes	NO	NO	NO	NO
1001213	Intron rentition	BnaA06g37500D	29388	29471	-	NO	NO	NO	Yes	NO	NO
1001214	Intron rentition	BnaA06g37500D	29388	29471	-	NO	NO	NO	Yes	NO	NO
1001215	Alternative 3’ splice site	BnaA07g35970D	29398	29466	-	Yes	Yes	NO	Yes	NO	NO
1001216	Alternative 3’ splice site	BnaA03g54840D	29431	30077	-	Yes	Yes	Yes	Yes	Yes	Yes
1001217	Mutually exclusive exons	BnaC04g51810D	29484	30438	+	Yes	NO	NO	Yes	NO	NO
1001218	Mutually exclusive exons	BnaC04g51810D	29498	30438	+	Yes	NO	NO	Yes	NO	NO
1001219	Alternative 5’ splice site	BnaA02g00090D	29523	29771	-	Yes	Yes	Yes	Yes	Yes	Yes
1001220	Mutually exclusive exons	BnaA07g35970D	29536	29580	-	NO	NO	Yes	NO	NO	Yes
1001221	Mutually exclusive exons	BnaA07g35970D	29563	29580	-	NO	NO	Yes	NO	NO	Yes
1001222	Intron rentition	BnaA07g00060D	29585	29616	-	Yes	Yes	Yes	NO	Yes	Yes
1001223	Intron rentition	BnaA07g00060D	29585	29616	-	NO	NO	NO	NO	NO	Yes
1001224	Intron rentition	BnaA07g00060D	29585	29616	-	NO	NO	NO	NO	NO	Yes
1001225	Intron rentition	BnaA07g00060D	29585	29616	-	NO	NO	NO	Yes	NO	NO
1001226	Intron rentition	BnaA07g00060D	29585	29616	-	NO	Yes	NO	NO	NO	NO
1001227	Intron rentition	BnaA07g00060D	29585	29616	-	Yes	NO	NO	NO	NO	NO
1001228	Intron rentition	BnaA07g00060D	29585	29616	-	NO	NO	NO	Yes	NO	NO
1001229	Intron rentition	BnaA07g00060D	29585	29616	-	NO	NO	NO	Yes	NO	NO
1001230	Intron rentition	BnaA07g00060D	29585	29616	-	NO	NO	NO	Yes	NO	NO
1001231	Intron rentition	BnaA07g00060D	29585	29616	-	Yes	Yes	Yes	NO	Yes	Yes
1001232	Intron rentition	BnaA07g00060D	29585	29616	-	NO	NO	NO	NO	NO	Yes
1001233	Alternative 5’ splice site	BnaA07g00060D	29616	30503	-	Yes	NO	NO	NO	NO	NO
1001234	Alternative 5’ splice site	BnaA07g00060D	29616	30525	-	NO	NO	NO	NO	NO	Yes
1001235	Alternative 5’ splice site	BnaA07g00060D	29616	30467	-	NO	Yes	NO	NO	NO	NO
1001236	Alternative 5’ splice site	BnaC05g49040D	29696	29812	+	NO	Yes	NO	NO	NO	NO
1001237	Alternative 5’ splice site	BnaC05g49040D	29698	29812	+	NO	NO	NO	NO	NO	Yes
1001238	Alternative 3’ splice site	BnaA04g27300D	29718	30291	+	Yes	Yes	Yes	Yes	Yes	Yes
1001239	Alternative 3’ splice site	BnaA03g00110D	29719	29757	+	Yes	Yes	Yes	Yes	Yes	NO
1001240	Alternative 3’ splice site	BnaA03g00070D	29719	29757	+	NO	NO	NO	NO	NO	Yes
1001241	Intron rentition	BnaA10g00040D	29719	29933	-	NO	NO	NO	Yes	NO	NO
1001242	Intron rentition	BnaA10g00040D	29719	29933	-	NO	NO	NO	Yes	NO	NO
1001243	Intron rentition	BnaA10g00040D	29719	29933	-	NO	NO	NO	Yes	NO	NO
1001244	Intron rentition	BnaA10g00040D	29719	29933	-	NO	NO	NO	Yes	NO	NO
1001245	Alternative 5’ splice site	BnaC05g49040D	29722	29812	+	NO	NO	NO	NO	Yes	NO
1001246	Alternative 5’ splice site	BnaA08g00060D	29749	29887	-	Yes	Yes	Yes	Yes	Yes	Yes
1001247	Alternative 5’ splice site	BnaA09g51630D	29768	29921	+	Yes	Yes	Yes	Yes	Yes	Yes
1001248	Alternative 3’ splice site	BnaC08g00100D	29875	29912	-	Yes	Yes	Yes	Yes	Yes	Yes
1001249	Alternative 5’ splice site	BnaA09g00070D	29878	30441	+	NO	Yes	NO	NO	NO	NO
1001250	Alternative 3’ splice site	BnaA06g00080D	29897	30238	+	NO	Yes	Yes	Yes	NO	Yes
1001251	Alternative 3’ splice site	BnaA06g00080D	29897	30266	+	Yes	NO	NO	NO	NO	NO
1001252	Alternative 3’ splice site	BnaA06g00080D	29897	30239	+	NO	NO	NO	NO	Yes	NO
1001253	Alternative 5’ splice site	BnaA09g00070D	29898	30178	+	NO	NO	NO	NO	NO	Yes
1001254	Alternative 5’ splice site	BnaA09g00070D	29910	30441	+	NO	NO	NO	NO	Yes	NO
1001255	Alternative 5’ splice site	BnaA09g00070D	29950	30441	+	Yes	NO	Yes	NO	NO	NO
1001256	Alternative 5’ splice site	BnaA02g35000D	29958	29998	-	Yes	Yes	Yes	Yes	Yes	Yes
1001257	Alternative 5’ splice site	BnaA02g35000D	29960	30001	-	NO	NO	Yes	NO	NO	NO
1001258	Alternative 5’ splice site	BnaA09g00070D	29960	30178	+	NO	NO	NO	Yes	NO	NO
1001259	Alternative 5’ splice site	BnaA07g00060D	29986	30564	-	NO	NO	NO	Yes	NO	NO
1001260	Alternative 5’ splice site	BnaA07g00060D	29990	30093	-	NO	Yes	Yes	Yes	NO	NO
1001261	Alternative 5’ splice site	BnaA07g00060D	29990	30563	-	NO	NO	NO	NO	Yes	NO
1001262	Alternative 5’ splice site	BnaA07g00060D	29990	30503	-	Yes	NO	NO	NO	NO	NO
1001263	Alternative 5’ splice site	BnaA07g00060D	29990	30134	-	NO	NO	NO	NO	NO	Yes
1001264	Alternative 3’ splice site	BnaA01g00100D	30043	30287	-	NO	Yes	NO	NO	NO	NO
1001265	Alternative 3’ splice site	BnaA01g00100D	30066	30287	-	Yes	NO	Yes	Yes	Yes	Yes
1001266	Intron rentition	BnaA09g00070D	30178	30341	+	NO	NO	NO	Yes	NO	Yes
1001267	Intron rentition	BnaA09g00070D	30178	30341	+	NO	Yes	NO	Yes	NO	Yes
1001268	Intron rentition	BnaA09g00070D	30178	30341	+	NO	NO	NO	NO	NO	Yes
1001269	Intron rentition	BnaA09g00070D	30178	30341	+	NO	Yes	NO	Yes	NO	Yes
1001270	Intron rentition	BnaA09g00070D	30178	30341	+	NO	NO	NO	Yes	NO	NO
1001271	Alternative 5’ splice site	BnaC02g44150D	30320	30366	+	Yes	Yes	Yes	Yes	Yes	Yes
1001272	Alternative 5’ splice site	BnaA06g37500D	30419	30589	-	Yes	Yes	Yes	Yes	Yes	Yes
1001273	Alternative 3’ splice site	BnaC05g00100D	30570	30811	-	Yes	Yes	Yes	Yes	Yes	Yes
1001274	Intron rentition	BnaA07g35970D	30589	30683	-	NO	NO	NO	NO	Yes	NO
1001275	Intron rentition	BnaA07g35970D	30589	30683	-	NO	NO	NO	NO	Yes	NO
1001276	Alternative 3’ splice site	BnaA02g00100D	30649	30982	-	Yes	Yes	Yes	Yes	Yes	Yes
1001277	Alternative 3’ splice site	BnaC01g00110D	30654	31132	-	NO	NO	NO	Yes	NO	NO
1001278	Alternative 3’ splice site	BnaC01g00110D	30708	31132	-	NO	NO	Yes	NO	NO	NO
1001279	Alternative 3’ splice site	BnaC01g00110D	30732	31132	-	NO	NO	NO	NO	NO	Yes
1001280	Alternative 5’ splice site	BnaC03g71210D	30762	31355	+	Yes	Yes	Yes	Yes	Yes	Yes
1001281	Alternative 3’ splice site	BnaC01g00110D	30800	31132	-	Yes	Yes	NO	NO	Yes	NO
1001282	Mutually exclusive exons	BnaA10g00040D	30829	30894	-	NO	NO	NO	NO	Yes	NO
1001283	Mutually exclusive exons	BnaA10g00040D	30829	30932	-	NO	NO	NO	NO	Yes	NO
1001284	Alternative 5’ splice site	BnaC05g00100D	30831	31371	-	Yes	Yes	Yes	Yes	Yes	Yes
1001285	Alternative 3’ splice site	BnaA02g35010D	30867	30955	-	Yes	Yes	Yes	Yes	Yes	Yes
1001286	Alternative 5’ splice site	BnaA03g54840D	31074	32582	-	Yes	Yes	Yes	Yes	Yes	Yes
1001287	Alternative 5’ splice site	BnaA01g00100D	31297	31758	-	Yes	Yes	Yes	Yes	Yes	Yes
1001288	Alternative 5’ splice site	BnaA05g00070D	31388	31452	-	NO	Yes	Yes	Yes	Yes	NO
1001289	Alternative 5’ splice site	BnaA05g00070D	31388	31457	-	Yes	NO	NO	NO	NO	Yes
1001290	Alternative 3’ splice site	BnaC03g71210D	31422	31850	+	Yes	Yes	Yes	Yes	Yes	Yes
1001291	Alternative 5’ splice site	BnaA04g27310D	31430	31640	+	Yes	NO	NO	NO	NO	NO
1001292	Alternative 5’ splice site	BnaA04g27310D	31462	31640	+	NO	NO	Yes	NO	NO	NO
1001293	Alternative 5’ splice site	BnaA04g27310D	31468	31640	+	NO	Yes	NO	NO	NO	NO
1001294	Alternative 5’ splice site	BnaA04g27310D	31469	31640	+	NO	NO	NO	Yes	NO	NO
1001295	Alternative 5’ splice site	BnaA04g27310D	31473	31640	+	NO	NO	NO	NO	Yes	NO
1001296	Alternative 5’ splice site	BnaA04g27310D	31489	31640	+	NO	NO	NO	NO	NO	Yes
1001297	Alternative 5’ splice site	BnaC08g00100D	31503	31535	-	Yes	Yes	Yes	Yes	Yes	Yes
1001298	Alternative 5’ splice site	BnaA06g37520D	31614	31625	+	NO	NO	NO	NO	NO	Yes
1001299	Alternative 3’ splice site	BnaC02g44150D	31617	31938	+	Yes	Yes	Yes	Yes	Yes	Yes
1001300	Alternative 3’ splice site	BnaA09g51630D	31624	31710	+	Yes	Yes	Yes	Yes	Yes	Yes
1001301	Alternative 5’ splice site	BnaA06g37520D	31631	31923	+	NO	NO	NO	NO	Yes	NO
1001302	Alternative 3’ splice site	BnaC04g51810D	31658	31752	+	Yes	Yes	Yes	Yes	Yes	Yes
1001303	Intron rentition	BnaC05g49040D	31674	31763	+	NO	Yes	NO	NO	NO	Yes
1001304	Intron rentition	BnaC05g49040D	31674	31763	+	NO	Yes	NO	NO	NO	Yes
1001305	Alternative 5’ splice site	BnaA07g35970D	31879	31924	-	Yes	Yes	Yes	Yes	Yes	Yes
1001306	Alternative 3’ splice site	BnaA04g00050D	31912	32299	-	Yes	Yes	Yes	Yes	Yes	Yes
1001307	Alternative 5’ splice site	BnaA09g00070D	31957	32271	+	NO	NO	NO	NO	NO	Yes
1001308	Mutually exclusive exons	BnaA04g27310D	32171	32252	+	NO	NO	Yes	NO	Yes	NO
1001309	Mutually exclusive exons	BnaA04g27310D	32171	32310	+	NO	NO	NO	NO	Yes	NO
1001310	Mutually exclusive exons	BnaA04g27310D	32171	32310	+	NO	NO	Yes	NO	Yes	NO
1001311	Mutually exclusive exons	BnaA04g27310D	32171	32252	+	NO	NO	NO	NO	Yes	NO
1001312	Mutually exclusive exons	BnaA04g27310D	32178	32310	+	NO	NO	NO	NO	Yes	NO
1001313	Mutually exclusive exons	BnaA04g27310D	32178	32310	+	NO	NO	NO	NO	Yes	NO
1001314	Mutually exclusive exons	BnaC01g00110D	32212	32525	-	NO	NO	NO	Yes	NO	NO
1001315	Mutually exclusive exons	BnaC01g00110D	32226	32525	-	NO	NO	NO	Yes	NO	NO
1001316	Intron rentition	BnaA04g27310D	32310	32397	+	NO	Yes	NO	NO	NO	NO
1001317	Intron rentition	BnaA04g27310D	32310	32397	+	NO	Yes	NO	NO	NO	NO
1001318	Alternative 5’ splice site	BnaA04g00050D	32377	33439	-	Yes	Yes	Yes	Yes	Yes	Yes
1001319	Alternative 3’ splice site	BnaA04g27310D	32397	33057	+	NO	NO	Yes	NO	NO	NO
1001320	Alternative 5’ splice site	BnaA10g00040D	32505	32538	-	Yes	Yes	Yes	Yes	Yes	Yes
1001321	Alternative 3’ splice site	BnaA04g27310D	32634	33052	+	Yes	NO	NO	Yes	NO	NO
1001322	Alternative 3’ splice site	BnaA04g27310D	32634	32713	+	NO	NO	NO	NO	NO	Yes
1001323	Alternative 3’ splice site	BnaA04g27310D	32634	33062	+	NO	NO	NO	NO	Yes	NO
1001324	Alternative 3’ splice site	BnaA04g27310D	32634	32718	+	NO	Yes	NO	NO	NO	NO
1001325	Alternative 3’ splice site	BnaA04g27310D	32634	33057	+	NO	NO	Yes	NO	NO	NO
1001326	Alternative 5’ splice site	BnaA10g00050D	32722	33012	+	Yes	Yes	Yes	Yes	Yes	Yes
1001327	Alternative 5’ splice site	BnaA02g00100D	32793	32966	-	Yes	Yes	Yes	Yes	Yes	Yes
1001328	Alternative 3’ splice site	BnaC05g49040D	32947	33248	+	NO	NO	NO	NO	NO	Yes
1001329	Alternative 3’ splice site	BnaC05g49040D	32947	33044	+	NO	Yes	NO	NO	NO	NO
1001330	Alternative 3’ splice site	BnaC05g49040D	32947	33037	+	NO	NO	NO	NO	Yes	NO
1001331	Alternative 3’ splice site	BnaC05g49040D	32947	33032	+	NO	NO	Yes	NO	NO	NO
1001332	Alternative 3’ splice site	BnaC05g49040D	32947	33054	+	Yes	NO	NO	NO	NO	NO
1001333	Alternative 3’ splice site	BnaC05g49040D	32947	33119	+	NO	NO	NO	Yes	NO	NO
1001334	Alternative 5’ splice site	BnaC04g51820D	33085	33250	+	Yes	Yes	Yes	Yes	Yes	Yes
1001335	Alternative 5’ splice site	BnaC02g00130D	33253	33424	+	Yes	Yes	Yes	Yes	Yes	Yes
1001336	Alternative 3’ splice site	BnaA01g34550D	33304	33940	-	NO	Yes	NO	NO	NO	NO
1001337	Alternative 3’ splice site	BnaA01g34550D	33304	34109	-	NO	Yes	NO	NO	NO	NO
1001338	Alternative 3’ splice site	BnaC02g44160D	33333	33628	-	Yes	Yes	Yes	Yes	Yes	Yes
1001339	Alternative 3’ splice site	BnaA01g34550D	33346	33940	-	Yes	NO	NO	NO	NO	NO
1001340	Alternative 3’ splice site	BnaA01g34550D	33353	34109	-	NO	NO	Yes	NO	NO	NO
1001341	Alternative 3’ splice site	BnaA01g34550D	33359	33940	-	NO	NO	NO	Yes	NO	NO
1001342	Alternative 5’ splice site	BnaC01g00110D	33386	33742	-	Yes	NO	Yes	Yes	Yes	Yes
1001343	Alternative 5’ splice site	BnaC01g00110D	33386	33872	-	NO	Yes	NO	NO	NO	NO
1001344	Alternative 3’ splice site	BnaA01g34550D	33406	33940	-	NO	NO	NO	NO	Yes	NO
1001345	Alternative 5’ splice site	BnaA10g27760D	33413	33484	+	Yes	Yes	Yes	Yes	Yes	Yes
1001346	Alternative 3’ splice site	BnaC04g51820D	33432	33790	+	Yes	Yes	Yes	Yes	Yes	Yes
1001347	Alternative 3’ splice site	BnaA10g00050D	33564	33821	+	Yes	Yes	Yes	Yes	Yes	Yes
1001348	Alternative 3’ splice site	BnaA01g34550D	33625	33940	-	NO	NO	Yes	NO	NO	Yes
1001349	Mutually exclusive exons	BnaA01g34550D	34030	34127	-	Yes	NO	NO	NO	NO	NO
1001350	Alternative 5’ splice site	BnaA01g34550D	34030	34785	-	NO	NO	NO	NO	NO	Yes
1001351	Mutually exclusive exons	BnaA01g34550D	34030	34109	-	Yes	NO	NO	NO	NO	NO
1001352	Alternative 3’ splice site	BnaA10g00070D	34186	34619	-	NO	NO	Yes	NO	NO	NO
1001353	Alternative 5’ splice site	BnaA01g34550D	34206	34658	-	Yes	Yes	Yes	Yes	Yes	NO
1001354	Alternative 3’ splice site	BnaA10g00070D	34207	34619	-	NO	NO	NO	NO	NO	Yes
1001355	Alternative 3’ splice site	BnaA10g00060D	34208	34619	-	Yes	Yes	Yes	Yes	Yes	Yes
1001356	Alternative 5’ splice site	BnaA01g00110D	34222	34304	+	Yes	Yes	Yes	Yes	Yes	Yes
1001357	Alternative 5’ splice site	BnaA01g34550D	34227	34828	-	NO	NO	NO	NO	Yes	NO
1001358	Alternative 5’ splice site	BnaA01g34550D	34227	34752	-	NO	NO	NO	Yes	NO	NO
1001359	Alternative 5’ splice site	BnaA02g35010D	34323	34465	-	Yes	Yes	Yes	Yes	Yes	Yes
1001360	Alternative 3’ splice site	BnaC02g00130D	34455	35278	+	Yes	Yes	Yes	Yes	Yes	Yes
1001361	Alternative 3’ splice site	BnaC04g00100D	34469	35029	-	Yes	Yes	Yes	Yes	Yes	Yes
1001362	Alternative 3’ splice site	BnaA09g00070D	34533	34713	+	NO	NO	NO	Yes	NO	NO
1001363	Alternative 3’ splice site	BnaA09g00070D	34533	34941	+	Yes	Yes	Yes	NO	Yes	Yes
1001364	Alternative 3’ splice site	BnaC05g49050D	34590	34817	-	Yes	Yes	Yes	Yes	Yes	Yes
1001365	Alternative 5’ splice site	BnaC02g44160D	34726	34803	-	Yes	Yes	Yes	Yes	Yes	Yes
1001366	Alternative 5’ splice site	BnaC03g71220D	34819	35016	+	NO	NO	NO	Yes	NO	NO
1001367	Alternative 5’ splice site	BnaC03g71220D	34851	35016	+	Yes	Yes	Yes	NO	Yes	Yes
1001368	Alternative 3’ splice site	BnaA09g51640D	34877	35079	-	NO	Yes	NO	NO	NO	Yes
1001369	Alternative 3’ splice site	BnaA09g51640D	34881	35079	-	NO	NO	Yes	NO	NO	NO
1001370	Alternative 3’ splice site	BnaA10g27760D	34967	35011	+	Yes	Yes	Yes	Yes	Yes	Yes
1001371	Alternative 5’ splice site	BnaC01g40670D	35007	35116	+	Yes	Yes	Yes	Yes	Yes	Yes
1001372	Alternative 5’ splice site	BnaA04g27320D	35045	35266	+	Yes	Yes	Yes	Yes	Yes	Yes
1001373	Alternative 3’ splice site	BnaA09g51640D	35050	35079	-	Yes	NO	NO	Yes	Yes	NO
1001374	Alternative 3’ splice site	BnaA09g51640D	35063	35255	-	NO	NO	NO	NO	Yes	NO
1001375	Alternative 5’ splice site	BnaC04g00100D	35109	35443	-	Yes	Yes	Yes	Yes	Yes	Yes
1001376	Alternative 5’ splice site	BnaC01g40670D	35426	35705	+	NO	NO	Yes	NO	NO	NO
1001377	Alternative 5’ splice site	BnaA04g27320D	35465	35539	+	NO	NO	NO	Yes	NO	NO
1001378	Intron rentition	BnaA04g27320D	35543	35613	+	NO	NO	NO	NO	Yes	NO
1001379	Intron rentition	BnaA04g27320D	35543	35613	+	NO	NO	NO	NO	Yes	NO
1001380	Alternative 5’ splice site	BnaC05g49050D	35563	36273	-	Yes	Yes	Yes	Yes	Yes	Yes
1001381	Alternative 3’ splice site	BnaUnng00060D	35642	35762	-	Yes	Yes	Yes	Yes	Yes	Yes
1001382	Alternative 5’ splice site	BnaA10g00060D	35843	35894	-	Yes	Yes	Yes	Yes	Yes	Yes
1001383	Alternative 3’ splice site	BnaA10g00070D	35963	36205	-	Yes	Yes	Yes	Yes	Yes	Yes
1001384	Alternative 5’ splice site	BnaA09g51640D	35980	36098	-	NO	NO	NO	NO	Yes	NO
1001385	Alternative 5’ splice site	BnaA09g51640D	35980	36051	-	Yes	Yes	Yes	Yes	NO	Yes
1001386	Alternative 5’ splice site	BnaA09g51640D	35981	36036	-	NO	Yes	NO	NO	NO	NO
1001387	Alternative 5’ splice site	BnaA09g51640D	35981	36098	-	NO	NO	NO	NO	NO	Yes
1001388	Alternative 5’ splice site	BnaA09g51640D	35981	36042	-	NO	NO	Yes	NO	NO	NO
1001389	Alternative 3’ splice site	BnaC01g40670D	36014	36064	+	Yes	Yes	Yes	Yes	Yes	Yes
1001390	Alternative 3’ splice site	BnaA02g00120D	36059	36501	-	Yes	Yes	Yes	Yes	Yes	Yes
1001391	Alternative 3’ splice site	BnaA02g00120D	36104	36898	-	NO	NO	Yes	NO	Yes	NO
1001392	Alternative 3’ splice site	BnaA02g35020D	36113	36175	-	Yes	Yes	Yes	Yes	Yes	Yes
1001393	Alternative 5’ splice site	BnaC02g00140D	36343	36576	+	Yes	Yes	Yes	Yes	Yes	Yes
1001394	Alternative 3’ splice site	BnaC06g00030D	36394	36649	-	NO	NO	NO	NO	Yes	NO
1001395	Alternative 3’ splice site	BnaC06g00030D	36414	36649	-	NO	NO	NO	Yes	NO	NO
1001396	Alternative 3’ splice site	BnaC06g00030D	36432	36649	-	Yes	NO	NO	NO	NO	NO
1001397	Alternative 3’ splice site	BnaC06g00030D	36485	36649	-	NO	Yes	NO	NO	NO	NO
1001398	Alternative 3’ splice site	BnaA04g27320D	36491	37379	+	Yes	Yes	Yes	Yes	Yes	Yes
1001399	Alternative 3’ splice site	BnaC06g00030D	36596	36649	-	NO	NO	Yes	NO	NO	Yes
1001400	Alternative 3’ splice site	BnaA10g27780D	36615	37132	-	NO	NO	NO	NO	NO	Yes
1001401	Alternative 5’ splice site	BnaC04g00120D	36702	36937	+	NO	Yes	NO	NO	NO	NO
1001402	Alternative 5’ splice site	BnaC04g00120D	36719	36937	+	Yes	NO	Yes	Yes	Yes	Yes
1001403	Alternative 3’ splice site	BnaC03g71220D	36734	37613	+	NO	NO	NO	Yes	NO	NO
1001404	Alternative 3’ splice site	BnaC03g71220D	36734	37104	+	Yes	Yes	Yes	NO	Yes	Yes
1001405	Alternative 5’ splice site	BnaA04g00060D	36750	36940	+	NO	NO	NO	NO	Yes	NO
1001406	Alternative 5’ splice site	BnaA04g00060D	36752	36940	+	Yes	Yes	Yes	Yes	NO	Yes
1001407	Alternative 3’ splice site	BnaA10g27780D	36881	37153	-	Yes	Yes	Yes	Yes	Yes	Yes
1001408	Alternative 3’ splice site	BnaC03g71230D	36959	37648	-	NO	NO	NO	Yes	NO	NO
1001409	Alternative 3’ splice site	BnaC03g71230D	36960	37648	-	NO	NO	NO	NO	NO	Yes
1001410	Alternative 5’ splice site	BnaA02g00120D	36999	37040	-	Yes	Yes	Yes	Yes	Yes	Yes
1001411	Intron rentition	BnaC06g00030D	37019	37131	-	NO	NO	NO	Yes	NO	NO
1001412	Intron rentition	BnaC06g00030D	37019	37131	-	NO	NO	NO	Yes	NO	NO
1001413	Alternative 3’ splice site	BnaAnng00060D	37032	37525	-	Yes	Yes	Yes	Yes	Yes	Yes
1001414	Alternative 5’ splice site	BnaC04g51830D	37125	37671	+	Yes	Yes	Yes	Yes	Yes	Yes
1001415	Mutually exclusive exons	BnaC06g00030D	37131	37369	-	Yes	NO	NO	NO	Yes	NO
1001416	Mutually exclusive exons	BnaC06g00030D	37131	37211	-	NO	NO	NO	NO	Yes	NO
1001417	Mutually exclusive exons	BnaC06g00030D	37131	37216	-	Yes	NO	NO	NO	NO	NO
1001418	Cassette exon	BnaC06g00030D	37131	37369	-	NO	Yes	NO	NO	NO	NO
1001419	Cassette exon	BnaC06g00030D	37131	37369	-	NO	Yes	NO	NO	NO	NO
1001420	Alternative 3’ splice site	BnaC02g00140D	37180	37991	+	Yes	Yes	Yes	Yes	Yes	Yes
1001421	Alternative 5’ splice site	BnaC01g40690D	37211	37235	+	Yes	Yes	NO	NO	NO	NO
1001422	Alternative 3’ splice site	BnaC02g44170D	37216	37277	-	Yes	Yes	Yes	Yes	Yes	Yes
1001423	Alternative 3’ splice site	BnaA04g27330D	37260	38544	-	NO	NO	NO	NO	NO	Yes
1001424	Alternative 5’ splice site	BnaC05g00110D	37319	38315	+	NO	NO	NO	NO	Yes	NO
1001425	Alternative 5’ splice site	BnaC05g00110D	37320	37427	+	NO	NO	NO	Yes	NO	NO
1001426	Alternative 3’ splice site	BnaA09g51650D	37322	37638	-	Yes	Yes	Yes	Yes	Yes	Yes
1001427	Alternative 5’ splice site	BnaC05g00110D	37346	37427	+	Yes	NO	NO	NO	NO	NO
1001428	Alternative 5’ splice site	BnaC01g40690D	37368	37855	+	NO	NO	Yes	Yes	Yes	Yes
1001429	Alternative 3’ splice site	BnaA01g00110D	37381	37744	+	Yes	Yes	Yes	Yes	Yes	Yes
1001430	Alternative 3’ splice site	BnaC03g71230D	37421	37648	-	NO	NO	Yes	NO	NO	NO
1001431	Mutually exclusive exons	BnaC04g00120D	37433	37605	+	Yes	Yes	Yes	Yes	Yes	Yes
1001432	Mutually exclusive exons	BnaC04g00120D	37433	37590	+	Yes	Yes	Yes	Yes	Yes	Yes
1001433	Alternative 5’ splice site	BnaC05g00110D	37436	38315	+	NO	Yes	NO	NO	NO	NO
1001434	Alternative 3’ splice site	BnaC03g71230D	37452	37648	-	NO	Yes	NO	NO	NO	NO
1001435	Alternative 5’ splice site	BnaC04g00120D	37461	37590	+	NO	NO	NO	NO	Yes	NO
1001436	Alternative 5’ splice site	BnaC05g00110D	37496	38315	+	NO	NO	Yes	NO	NO	NO
1001437	Alternative 3’ splice site	BnaC03g71230D	37502	37648	-	Yes	NO	NO	NO	NO	NO
1001438	Alternative 5’ splice site	BnaAnng00060D	37553	37739	-	Yes	Yes	Yes	Yes	Yes	Yes
1001439	Intron rentition	BnaC04g00120D	37590	37673	+	NO	NO	Yes	NO	NO	NO
1001440	Intron rentition	BnaC04g00120D	37590	37673	+	NO	NO	Yes	NO	NO	NO
1001441	Intron rentition	BnaC04g00120D	37605	37673	+	NO	NO	Yes	NO	NO	NO
1001442	Intron rentition	BnaC04g00120D	37605	37673	+	NO	NO	Yes	NO	NO	NO
1001443	Alternative 3’ splice site	BnaC03g71230D	37611	37648	-	NO	NO	NO	NO	Yes	NO
1001444	Alternative 3’ splice site	BnaA04g27330D	37613	38544	-	NO	NO	NO	NO	Yes	NO
1001445	Alternative 3’ splice site	BnaA04g27330D	37616	38544	-	NO	NO	NO	Yes	NO	NO
1001446	Alternative 3’ splice site	BnaA04g27330D	37619	38544	-	NO	NO	Yes	NO	NO	NO
1001447	Alternative 3’ splice site	BnaA04g27330D	37620	38544	-	Yes	NO	NO	NO	NO	NO
1001448	Alternative 3’ splice site	BnaA04g27330D	37622	38544	-	NO	Yes	NO	NO	NO	NO
1001449	Alternative 5’ splice site	BnaC05g00110D	37624	38315	+	NO	NO	NO	NO	NO	Yes
1001450	Alternative 5’ splice site	BnaC05g00110D	37624	38117	+	Yes	Yes	Yes	NO	Yes	Yes
1001451	Alternative 5’ splice site	BnaA03g00120D	37752	38277	+	NO	NO	NO	NO	Yes	NO
1001452	Alternative 5’ splice site	BnaA10g27780D	37760	38253	-	Yes	Yes	Yes	Yes	Yes	Yes
1001453	Alternative 5’ splice site	BnaA02g35020D	37863	38063	-	Yes	Yes	Yes	Yes	Yes	Yes
1001454	Alternative 5’ splice site	BnaA03g00120D	37866	38277	+	NO	NO	NO	Yes	NO	NO
1001455	Alternative 5’ splice site	BnaA03g54860D	37883	37972	+	Yes	Yes	Yes	Yes	Yes	Yes
1001456	Alternative 5’ splice site	BnaA03g54860D	37883	38131	+	NO	NO	NO	Yes	NO	NO
1001457	Alternative 5’ splice site	BnaA03g00120D	37903	38277	+	Yes	Yes	Yes	NO	NO	Yes
1001458	Alternative 5’ splice site	BnaC01g40690D	37993	38750	+	NO	NO	NO	Yes	NO	NO
1001459	Alternative 3’ splice site	BnaA02g00130D	38063	38176	-	Yes	Yes	Yes	Yes	Yes	Yes
1001460	Alternative 3’ splice site	BnaA01g00120D	38068	38439	-	Yes	Yes	Yes	Yes	Yes	Yes
1001461	Intron rentition	BnaC05g00110D	38117	38166	+	Yes	NO	NO	NO	NO	NO
1001462	Intron rentition	BnaC05g00110D	38117	38166	+	Yes	NO	NO	NO	NO	NO
1001463	Intron rentition	BnaC04g00120D	38129	38231	+	Yes	NO	NO	NO	NO	NO
1001464	Intron rentition	BnaC04g00120D	38129	38231	+	Yes	NO	NO	NO	NO	NO
1001465	Alternative 5’ splice site	BnaUnng00060D	38206	38247	-	Yes	Yes	Yes	Yes	Yes	Yes
1001466	Alternative 3’ splice site	BnaA04g00060D	38533	38736	+	NO	NO	Yes	NO	NO	NO
1001467	Alternative 3’ splice site	BnaA04g00060D	38533	38729	+	Yes	Yes	NO	NO	NO	NO
1001468	Alternative 3’ splice site	BnaA04g00060D	38533	38734	+	NO	NO	NO	NO	Yes	NO
1001469	Alternative 3’ splice site	BnaA04g00060D	38533	38842	+	NO	NO	NO	Yes	NO	Yes
1001470	Alternative 3’ splice site	BnaA03g00120D	38536	38634	+	NO	NO	NO	Yes	NO	NO
1001471	Alternative 3’ splice site	BnaA03g00120D	38536	38798	+	NO	NO	NO	NO	Yes	NO
1001472	Alternative 3’ splice site	BnaA03g00120D	38545	38616	+	Yes	Yes	Yes	Yes	Yes	Yes
1001473	Alternative 3’ splice site	BnaA02g35030D	38546	38803	-	Yes	NO	NO	NO	NO	NO
1001474	Intron rentition	BnaC04g00120D	38555	38637	+	NO	NO	Yes	NO	NO	NO
1001475	Intron rentition	BnaC04g00120D	38555	38637	+	NO	NO	Yes	NO	NO	NO
1001476	Alternative 3’ splice site	BnaA09g00080D	38557	39048	-	NO	NO	NO	NO	Yes	NO
1001477	Intron rentition	BnaC03g71230D	38564	38662	-	NO	Yes	NO	NO	NO	NO
1001478	Intron rentition	BnaC03g71230D	38564	38662	-	NO	Yes	NO	NO	NO	NO
1001479	Alternative 3’ splice site	BnaC05g00110D	38592	38649	+	Yes	Yes	Yes	Yes	Yes	Yes
1001480	Alternative 5’ splice site	BnaA06g00100D	38645	38752	+	Yes	Yes	Yes	Yes	Yes	Yes
1001481	Alternative 3’ splice site	BnaA09g00080D	38656	39048	-	NO	Yes	NO	NO	NO	NO
1001482	Alternative 5’ splice site	BnaC03g71230D	38668	38695	-	Yes	NO	NO	NO	NO	NO
1001483	Alternative 3’ splice site	BnaA02g35030D	38762	38803	-	NO	NO	NO	NO	NO	Yes
1001484	Alternative 3’ splice site	BnaA02g35030D	38763	38803	-	NO	Yes	Yes	Yes	NO	NO
1001485	Alternative 3’ splice site	BnaA02g35030D	38766	38803	-	NO	NO	NO	NO	Yes	NO
1001486	Alternative 3’ splice site	BnaA09g00080D	38803	39048	-	NO	NO	NO	NO	NO	Yes
1001487	Alternative 5’ splice site	BnaC05g00120D	38808	38833	+	Yes	Yes	Yes	Yes	Yes	Yes
1001488	Alternative 3’ splice site	BnaC01g40690D	38823	39270	+	Yes	NO	NO	NO	NO	NO
1001489	Alternative 3’ splice site	BnaC01g40690D	38823	38941	+	NO	Yes	NO	NO	NO	NO
1001490	Alternative 3’ splice site	BnaC01g40690D	38823	39017	+	NO	NO	Yes	Yes	Yes	Yes
1001491	Alternative 3’ splice site	BnaC05g49060D	38880	39084	-	Yes	Yes	Yes	Yes	Yes	Yes
1001492	Alternative 5’ splice site	BnaC08g00110D	38910	39181	+	Yes	Yes	Yes	Yes	Yes	Yes
1001493	Alternative 3’ splice site	BnaC04g51830D	38944	39638	+	Yes	Yes	Yes	Yes	Yes	Yes
1001494	Alternative 5’ splice site	BnaC02g00150D	38958	39209	+	Yes	Yes	Yes	Yes	Yes	Yes
1001495	Alternative 3’ splice site	BnaC04g00120D	38965	39136	+	Yes	NO	NO	NO	NO	Yes
1001496	Intron rentition	BnaC03g71230D	38977	39061	-	NO	Yes	NO	NO	NO	NO
1001497	Intron rentition	BnaC03g71230D	38977	39061	-	NO	Yes	NO	NO	NO	NO
1001498	Alternative 3’ splice site	BnaA09g00080D	39007	39048	-	Yes	NO	Yes	Yes	NO	NO
1001499	Alternative 3’ splice site	BnaA10g27790D	39163	39587	-	NO	NO	NO	Yes	NO	NO
1001500	Alternative 5’ splice site	BnaA01g00120D	39165	39457	-	Yes	Yes	Yes	Yes	Yes	Yes
1001501	Alternative 3’ splice site	BnaA10g27790D	39172	39587	-	NO	NO	NO	NO	Yes	NO
1001502	Alternative 3’ splice site	BnaA10g27790D	39183	39587	-	NO	Yes	NO	NO	NO	NO
1001503	Alternative 5’ splice site	BnaC04g00130D	39193	39272	+	Yes	NO	NO	NO	NO	Yes
1001504	Alternative 3’ splice site	BnaA10g27790D	39197	39587	-	NO	NO	Yes	NO	NO	NO
1001505	Alternative 5’ splice site	BnaA05g00090D	39206	39640	+	NO	NO	NO	NO	Yes	NO
1001506	Mutually exclusive exons	BnaA02g35030D	39212	39392	-	Yes	NO	Yes	Yes	Yes	Yes
1001507	Mutually exclusive exons	BnaA02g35030D	39224	39392	-	Yes	NO	NO	NO	NO	Yes
1001508	Intron rentition	BnaA04g27330D	39224	39297	-	NO	NO	NO	Yes	NO	Yes
1001509	Intron rentition	BnaA04g27330D	39224	39297	-	NO	NO	NO	Yes	NO	Yes
1001510	Alternative 5’ splice site	BnaA05g00090D	39226	39640	+	NO	NO	NO	Yes	NO	NO
1001511	Intron rentition	BnaA09g00080D	39245	39365	-	NO	Yes	NO	NO	Yes	NO
1001512	Intron rentition	BnaA09g00080D	39245	39365	-	NO	Yes	NO	NO	Yes	NO
1001513	Alternative 5’ splice site	BnaA05g00090D	39253	39640	+	Yes	Yes	Yes	NO	NO	Yes
1001514	Alternative 3’ splice site	BnaA10g27790D	39269	39587	-	Yes	NO	NO	NO	NO	NO
1001515	Mutually exclusive exons	BnaA02g35030D	39274	39392	-	Yes	NO	Yes	Yes	Yes	Yes
1001516	Alternative 3’ splice site	BnaA10g27790D	39274	39587	-	NO	NO	NO	NO	NO	Yes
1001517	Alternative 3’ splice site	BnaC05g00120D	39279	39442	+	Yes	Yes	Yes	Yes	Yes	Yes
1001518	Alternative 5’ splice site	BnaC05g49060D	39326	39379	-	Yes	Yes	Yes	Yes	Yes	Yes
1001519	Alternative 5’ splice site	BnaA09g51650D	39399	39476	-	Yes	Yes	Yes	Yes	Yes	Yes
1001520	Alternative 3’ splice site	BnaC04g00120D	39462	40112	+	NO	Yes	NO	Yes	NO	NO
1001521	Alternative 3’ splice site	BnaC04g00130D	39462	40112	+	Yes	NO	NO	NO	NO	Yes
1001522	Alternative 3’ splice site	BnaC04g00120D	39462	39908	+	NO	NO	Yes	NO	NO	NO
1001523	Intron rentition	BnaA03g54860D	39515	39609	+	NO	NO	NO	NO	Yes	NO
1001524	Intron rentition	BnaA03g54860D	39515	39609	+	NO	NO	NO	NO	Yes	NO
1001525	Alternative 5’ splice site	BnaA02g35030D	39527	39724	-	NO	NO	NO	Yes	NO	NO
1001526	Alternative 5’ splice site	BnaA02g35030D	39527	39703	-	Yes	Yes	NO	NO	NO	Yes
1001527	Alternative 5’ splice site	BnaA02g35030D	39527	39696	-	NO	NO	Yes	NO	NO	NO
1001528	Alternative 5’ splice site	BnaA02g35030D	39527	39721	-	NO	NO	NO	NO	Yes	NO
1001529	Alternative 5’ splice site	BnaC01g00120D	39617	39715	+	NO	NO	Yes	NO	Yes	NO
1001530	Alternative 5’ splice site	BnaA10g00070D	39620	39864	-	Yes	Yes	Yes	Yes	Yes	Yes
1001531	Mutually exclusive exons	BnaA10g27790D	39670	39991	-	Yes	Yes	Yes	Yes	Yes	Yes
1001532	Mutually exclusive exons	BnaA10g27790D	39697	39991	-	Yes	Yes	Yes	Yes	Yes	Yes
1001533	Alternative 3’ splice site	BnaA03g54860D	39835	40100	+	Yes	Yes	Yes	Yes	Yes	Yes
1001534	Alternative 3’ splice site	BnaC04g00120D	39853	40112	+	NO	NO	NO	NO	Yes	NO
1001535	Mutually exclusive exons	BnaA05g00090D	39910	40037	+	NO	NO	NO	Yes	NO	NO
1001536	Mutually exclusive exons	BnaA05g00090D	39910	40037	+	NO	NO	NO	NO	Yes	NO
1001537	Mutually exclusive exons	BnaA05g00090D	39910	40052	+	NO	NO	NO	Yes	NO	NO
1001538	Mutually exclusive exons	BnaA05g00090D	39910	40052	+	NO	NO	NO	NO	Yes	NO
1001539	Mutually exclusive exons	BnaC03g71230D	39942	40088	-	NO	NO	Yes	NO	NO	NO
1001540	Alternative 5’ splice site	BnaC03g71230D	39942	40052	-	Yes	NO	NO	NO	NO	NO
1001541	Mutually exclusive exons	BnaC03g71230D	39942	40119	-	NO	NO	Yes	NO	NO	NO
1001542	Alternative 3’ splice site	BnaA06g00100D	40008	40409	+	Yes	Yes	Yes	Yes	Yes	Yes
1001543	Alternative 3’ splice site	BnaAnng00070D	40016	40291	-	Yes	Yes	Yes	Yes	Yes	Yes
1001544	Alternative 5’ splice site	BnaA04g27330D	40022	40653	-	Yes	Yes	Yes	Yes	Yes	Yes
1001545	Alternative 5’ splice site	BnaC02g44170D	40060	40206	-	Yes	Yes	Yes	Yes	Yes	Yes
1001546	Alternative 5’ splice site	BnaA10g00080D	40072	40302	+	Yes	NO	NO	NO	NO	NO
1001547	Alternative 5’ splice site	BnaA10g00080D	40132	40277	+	Yes	Yes	Yes	Yes	Yes	Yes
1001548	Alternative 5’ splice site	BnaC01g00120D	40135	40160	+	NO	Yes	NO	NO	NO	NO
1001549	Alternative 5’ splice site	BnaA02g00130D	40144	40395	-	Yes	Yes	Yes	Yes	Yes	Yes
1001550	Alternative 5’ splice site	BnaC06g00030D	40156	40434	-	NO	NO	NO	Yes	NO	NO
1001551	Alternative 3’ splice site	BnaAnng00070D	40219	41058	-	NO	NO	NO	NO	Yes	NO
1001552	Alternative 3’ splice site	BnaAnng00070D	40227	41058	-	NO	Yes	NO	NO	NO	NO
1001553	Alternative 3’ splice site	BnaAnng00070D	40249	41058	-	Yes	NO	NO	NO	NO	NO
1001554	Alternative 3’ splice site	BnaAnng00070D	40256	41058	-	NO	NO	Yes	NO	NO	NO
1001555	Alternative 5’ splice site	BnaC03g71230D	40256	40324	-	NO	NO	Yes	Yes	NO	Yes
1001556	Alternative 5’ splice site	BnaC03g71230D	40256	40326	-	NO	NO	NO	NO	Yes	NO
1001557	Alternative 5’ splice site	BnaC03g71230D	40256	40325	-	NO	Yes	NO	NO	NO	NO
1001558	Alternative 5’ splice site	BnaA10g27790D	40332	40825	-	Yes	Yes	Yes	Yes	Yes	Yes
1001559	Mutually exclusive exons	BnaA05g00090D	40420	40537	+	NO	NO	NO	Yes	NO	NO
1001560	Mutually exclusive exons	BnaA05g00090D	40420	40516	+	NO	NO	NO	Yes	NO	NO
1001561	Alternative 5’ splice site	BnaA09g00080D	40505	40802	-	Yes	Yes	Yes	Yes	Yes	Yes
1001562	Intron rentition	BnaA10g00080D	40516	40595	+	Yes	NO	NO	NO	NO	NO
1001563	Intron rentition	BnaA10g00080D	40516	40595	+	Yes	NO	NO	NO	NO	NO
1001564	Intron rentition	BnaAnng00070D	40539	40605	-	NO	NO	NO	Yes	NO	Yes
1001565	Intron rentition	BnaAnng00070D	40539	40605	-	NO	NO	NO	Yes	NO	Yes
1001566	Alternative 5’ splice site	BnaA01g34560D	40578	40676	+	Yes	Yes	Yes	Yes	Yes	Yes
1001567	Alternative 3’ splice site	BnaA10g00080D	40595	40639	+	NO	Yes	Yes	Yes	Yes	Yes
1001568	Alternative 3’ splice site	BnaA07g36000D	40684	40788	-	Yes	Yes	Yes	Yes	Yes	Yes
1001569	Alternative 3’ splice site	BnaC04g51840D	40736	41784	-	NO	NO	NO	NO	Yes	NO
1001570	Alternative 5’ splice site	BnaA10g00090D	40768	40836	+	NO	Yes	Yes	Yes	Yes	Yes
1001571	Alternative 3’ splice site	BnaC03g71240D	40797	41226	-	NO	NO	NO	NO	Yes	NO
1001572	Alternative 3’ splice site	BnaC02g00150D	40797	41224	+	Yes	Yes	Yes	Yes	Yes	Yes
1001573	Alternative 3’ splice site	BnaC03g71240D	40811	41226	-	NO	NO	NO	Yes	NO	NO
1001574	Alternative 3’ splice site	BnaC03g71240D	40812	41226	-	NO	NO	NO	NO	NO	Yes
1001575	Alternative 3’ splice site	BnaC03g71240D	40830	41226	-	NO	NO	Yes	NO	NO	NO
1001576	Alternative 3’ splice site	BnaC03g71240D	40832	41226	-	NO	Yes	NO	NO	NO	NO
1001577	Alternative 5’ splice site	BnaA03g54870D	40840	41002	+	Yes	Yes	Yes	Yes	Yes	Yes
1001578	Alternative 5’ splice site	BnaC01g00120D	40972	41514	+	NO	NO	NO	Yes	NO	NO
1001579	Alternative 3’ splice site	BnaA10g00090D	41099	41173	+	NO	Yes	Yes	Yes	Yes	Yes
1001580	Alternative 3’ splice site	BnaA10g00080D	41099	41198	+	Yes	NO	NO	NO	NO	NO
1001581	Alternative 5’ splice site	BnaC01g00120D	41112	41514	+	Yes	Yes	NO	NO	NO	Yes
1001582	Alternative 3’ splice site	BnaC03g71240D	41130	41226	-	Yes	NO	NO	NO	NO	NO
1001583	Alternative 5’ splice site	BnaAnng00070D	41149	41496	-	NO	NO	Yes	NO	Yes	NO
1001584	Alternative 5’ splice site	BnaAnng00070D	41149	41421	-	NO	NO	NO	NO	NO	Yes
1001585	Alternative 5’ splice site	BnaAnng00070D	41149	41482	-	NO	Yes	NO	NO	NO	NO
1001586	Alternative 5’ splice site	BnaAnng00070D	41149	41472	-	NO	NO	NO	Yes	NO	NO
1001587	Alternative 5’ splice site	BnaAnng00070D	41149	41494	-	Yes	NO	NO	NO	NO	NO
1001588	Alternative 5’ splice site	BnaA05g34260D	41213	41295	+	NO	NO	Yes	NO	NO	NO
1001589	Alternative 5’ splice site	BnaA05g34260D	41215	41295	+	NO	NO	NO	NO	Yes	NO
1001590	Alternative 5’ splice site	BnaA05g34260D	41218	41295	+	NO	Yes	NO	Yes	NO	NO
1001591	Alternative 5’ splice site	BnaA05g34260D	41224	41295	+	NO	NO	NO	NO	NO	Yes
1001592	Alternative 3’ splice site	BnaA01g34560D	41318	41620	+	Yes	Yes	Yes	Yes	Yes	Yes
1001593	Alternative 5’ splice site	BnaA04g00070D	41335	41646	+	NO	NO	NO	NO	Yes	NO
1001594	Alternative 5’ splice site	BnaA05g34260D	41352	41606	+	Yes	NO	NO	NO	NO	NO
1001595	Alternative 3’ splice site	BnaC02g00160D	41454	41877	-	Yes	Yes	Yes	Yes	Yes	Yes
1001596	Alternative 3’ splice site	BnaA10g00100D	41463	41559	-	Yes	Yes	Yes	Yes	Yes	Yes
1001597	Alternative 3’ splice site	BnaA05g00090D	41465	41669	+	Yes	Yes	Yes	Yes	Yes	Yes
1001598	Alternative 5’ splice site	BnaA04g00070D	41475	41943	+	NO	NO	Yes	NO	NO	NO
1001599	Alternative 5’ splice site	BnaA04g00070D	41475	41646	+	Yes	Yes	Yes	Yes	NO	Yes
1001600	Alternative 5’ splice site	BnaC09g50880D	41488	41628	+	Yes	Yes	Yes	Yes	Yes	Yes
1001601	Alternative 3’ splice site	BnaA09g00090D	41622	42341	-	Yes	Yes	Yes	Yes	Yes	Yes
1001602	Mutually exclusive exons	BnaC03g71240D	41629	41756	-	Yes	Yes	Yes	Yes	Yes	Yes
1001603	Mutually exclusive exons	BnaC03g71240D	41629	41693	-	Yes	Yes	Yes	Yes	Yes	Yes
1001604	Alternative 5’ splice site	BnaC04g00140D	41703	42331	+	NO	NO	Yes	NO	NO	NO
1001605	Mutually exclusive exons	BnaA04g00070D	41719	41943	+	NO	Yes	NO	NO	Yes	NO
1001606	Mutually exclusive exons	BnaA04g00070D	41719	41933	+	NO	NO	NO	NO	Yes	NO
1001607	Mutually exclusive exons	BnaA04g00070D	41736	41943	+	NO	Yes	NO	NO	Yes	NO
1001608	Alternative 3’ splice site	BnaA02g35040D	41748	42184	-	NO	NO	NO	NO	Yes	NO
1001609	Alternative 5’ splice site	BnaA10g27800D	41850	42036	+	NO	NO	NO	NO	NO	Yes
1001610	Alternative 3’ splice site	BnaA02g35040D	41862	42184	-	NO	NO	NO	NO	NO	Yes
1001611	Alternative 5’ splice site	BnaA10g27800D	41867	42036	+	NO	Yes	NO	NO	NO	NO
1001612	Alternative 5’ splice site	BnaA10g27800D	41874	42036	+	NO	NO	Yes	NO	NO	NO
1001613	Alternative 5’ splice site	BnaA10g27800D	41876	42036	+	NO	NO	NO	Yes	NO	NO
1001614	Alternative 3’ splice site	BnaA02g35040D	41879	42013	-	Yes	Yes	Yes	Yes	Yes	Yes
1001615	Alternative 5’ splice site	BnaA10g27800D	41881	42036	+	NO	NO	NO	NO	Yes	NO
1001616	Alternative 3’ splice site	BnaA02g35040D	41905	42184	-	NO	NO	NO	Yes	NO	NO
1001617	Alternative 3’ splice site	BnaA02g35040D	41912	42184	-	NO	Yes	NO	NO	NO	NO
1001618	Alternative 5’ splice site	BnaA10g27800D	41969	42036	+	Yes	NO	NO	NO	NO	NO
1001619	Alternative 5’ splice site	BnaA03g00130D	42009	42159	+	Yes	Yes	Yes	Yes	Yes	Yes
1001620	Alternative 5’ splice site	BnaC06g00030D	42012	42281	-	Yes	Yes	Yes	Yes	Yes	Yes
1001621	Alternative 5’ splice site	BnaC04g00140D	42036	42331	+	Yes	Yes	NO	Yes	Yes	Yes
1001622	Alternative 5’ splice site	BnaC08g00110D	42090	42189	+	NO	NO	Yes	NO	NO	NO
1001623	Alternative 5’ splice site	BnaC08g00110D	42094	42189	+	NO	NO	NO	NO	Yes	NO
1001624	Alternative 5’ splice site	BnaC08g00110D	42095	42189	+	NO	Yes	NO	NO	NO	NO
1001625	Alternative 5’ splice site	BnaC08g00110D	42099	42189	+	Yes	NO	NO	NO	NO	NO
1001626	Alternative 5’ splice site	BnaC08g00110D	42105	42189	+	NO	NO	NO	Yes	NO	NO
1001627	Alternative 5’ splice site	BnaC08g00110D	42119	42189	+	NO	NO	NO	NO	NO	Yes
1001628	Alternative 5’ splice site	BnaA01g34570D	42210	42504	+	NO	NO	NO	NO	NO	Yes
1001629	Alternative 3’ splice site	BnaA03g00130D	42242	42372	+	Yes	Yes	Yes	Yes	Yes	Yes
1001630	Alternative 5’ splice site	BnaA01g34570D	42302	42504	+	NO	Yes	NO	NO	NO	NO
1001631	Alternative 5’ splice site	BnaA01g34570D	42349	42504	+	Yes	NO	Yes	Yes	Yes	NO
1001632	Alternative 5’ splice site	BnaC04g51840D	42394	42516	-	NO	NO	NO	NO	Yes	NO
1001633	Alternative 3’ splice site	BnaA05g00100D	42410	42494	-	NO	NO	NO	NO	NO	Yes
1001634	Alternative 3’ splice site	BnaA05g00100D	42436	42494	-	NO	Yes	NO	NO	NO	NO
1001635	Alternative 3’ splice site	BnaA05g00100D	42438	42494	-	Yes	NO	NO	Yes	NO	NO
1001636	Alternative 3’ splice site	BnaA05g00100D	42542	42739	-	NO	NO	Yes	NO	Yes	NO
1001637	Intron rentition	BnaA10g27800D	42548	42623	+	NO	Yes	NO	NO	Yes	NO
1001638	Intron rentition	BnaA10g27800D	42548	42623	+	NO	Yes	NO	NO	Yes	NO
1001639	Alternative 5’ splice site	BnaA02g35040D	42595	43035	-	NO	NO	NO	Yes	NO	NO
1001640	Alternative 5’ splice site	BnaA02g35040D	42595	42987	-	NO	Yes	NO	NO	NO	NO
1001641	Alternative 5’ splice site	BnaA02g35040D	42595	42920	-	Yes	NO	Yes	NO	Yes	Yes
1001642	Alternative 5’ splice site	BnaC02g00160D	42733	42845	-	Yes	Yes	Yes	Yes	Yes	Yes
1001643	Intron rentition	BnaC08g00110D	42738	42812	+	Yes	NO	Yes	Yes	Yes	NO
1001644	Intron rentition	BnaC08g00110D	42738	42812	+	NO	NO	NO	NO	Yes	NO
1001645	Intron rentition	BnaC08g00110D	42738	42812	+	Yes	NO	Yes	Yes	Yes	NO
1001646	Intron rentition	BnaC08g00110D	42738	42812	+	NO	NO	NO	NO	Yes	NO
1001647	Alternative 5’ splice site	BnaA09g51660D	42742	42780	+	Yes	Yes	Yes	Yes	Yes	Yes
1001648	Intron rentition	BnaC03g71240D	42747	42826	-	Yes	Yes	Yes	Yes	Yes	Yes
1001649	Intron rentition	BnaC03g71240D	42747	42826	-	Yes	Yes	Yes	Yes	Yes	Yes
1001650	Intron rentition	BnaA01g34570D	42999	43084	+	NO	Yes	NO	NO	NO	NO
1001651	Intron rentition	BnaA01g34570D	42999	43084	+	NO	Yes	NO	NO	NO	NO
1001652	Alternative 3’ splice site	BnaA03g54870D	43001	43644	+	Yes	Yes	Yes	Yes	Yes	Yes
1001653	Alternative 3’ splice site	BnaA10g27800D	43002	43106	+	NO	Yes	NO	NO	NO	NO
1001654	Alternative 3’ splice site	BnaA10g27800D	43002	43019	+	NO	NO	NO	NO	Yes	NO
1001655	Alternative 3’ splice site	BnaA10g27800D	43002	43118	+	Yes	NO	Yes	Yes	NO	Yes
1001656	Intron rentition	BnaC09g50880D	43045	43370	+	Yes	Yes	NO	Yes	Yes	Yes
1001657	Intron rentition	BnaC09g50880D	43045	44110	+	Yes	NO	NO	Yes	NO	NO
1001658	Intron rentition	BnaC09g50880D	43045	43370	+	Yes	Yes	NO	Yes	Yes	Yes
1001659	Intron rentition	BnaC09g50880D	43045	44110	+	Yes	NO	NO	Yes	NO	NO
1001660	Alternative 5’ splice site	BnaA05g00100D	43265	43510	-	Yes	Yes	Yes	Yes	Yes	Yes
1001661	Alternative 3’ splice site	BnaC08g00110D	43290	44138	+	Yes	Yes	Yes	Yes	Yes	Yes
1001662	Intron rentition	BnaC01g00120D	43405	43505	+	NO	NO	NO	Yes	NO	NO
1001663	Intron rentition	BnaC01g00120D	43405	43505	+	NO	NO	NO	Yes	NO	NO
1001664	Alternative 5’ splice site	BnaC03g71240D	43439	44467	-	NO	NO	NO	NO	Yes	NO
1001665	Alternative 5’ splice site	BnaA07g36000D	43451	43792	-	Yes	Yes	Yes	Yes	Yes	Yes
1001666	Mutually exclusive exons	BnaC01g00120D	43505	43744	+	NO	Yes	NO	NO	NO	NO
1001667	Mutually exclusive exons	BnaC01g00120D	43517	43744	+	NO	Yes	NO	NO	NO	NO
1001668	Alternative 5’ splice site	BnaC03g71250D	43517	43573	+	Yes	Yes	Yes	Yes	Yes	Yes
1001669	Alternative 5’ splice site	BnaC02g44180D	43575	43803	+	Yes	Yes	Yes	Yes	Yes	Yes
1001670	Intron rentition	BnaC09g50880D	43852	44110	+	Yes	NO	NO	Yes	NO	NO
1001671	Intron rentition	BnaC09g50880D	43852	44110	+	Yes	NO	NO	Yes	NO	NO
1001672	Intron rentition	BnaC01g00120D	43922	44018	+	NO	Yes	NO	NO	NO	NO
1001673	Intron rentition	BnaC01g00120D	43922	44018	+	NO	Yes	NO	NO	NO	NO
1001674	Intron rentition	BnaC09g50880D	44055	44110	+	NO	Yes	NO	NO	Yes	NO
1001675	Intron rentition	BnaC09g50880D	44055	44110	+	NO	Yes	NO	NO	Yes	NO
1001676	Alternative 3’ splice site	BnaA04g00070D	44088	45584	+	NO	NO	Yes	NO	NO	NO
1001677	Alternative 3’ splice site	BnaA04g00070D	44088	45870	+	NO	NO	NO	NO	Yes	NO
1001678	Alternative 3’ splice site	BnaA04g00070D	44088	45635	+	Yes	Yes	NO	Yes	NO	Yes
1001679	Alternative 5’ splice site	BnaC03g71240D	44097	44108	-	NO	NO	Yes	NO	NO	NO
1001680	Alternative 3’ splice site	BnaC04g00140D	44156	44874	+	Yes	Yes	Yes	Yes	Yes	Yes
1001681	Alternative 5’ splice site	BnaC03g71240D	44166	44374	-	Yes	NO	NO	NO	NO	NO
1001682	Alternative 5’ splice site	BnaC03g71240D	44166	45388	-	NO	NO	NO	NO	NO	Yes
1001683	Alternative 5’ splice site	BnaC03g71240D	44166	44268	-	NO	NO	NO	Yes	NO	NO
1001684	Alternative 5’ splice site	BnaC03g71240D	44166	44259	-	NO	Yes	NO	NO	NO	NO
1001685	Alternative 3’ splice site	BnaC01g00120D	44320	44527	+	NO	NO	Yes	NO	NO	NO
1001686	Alternative 3’ splice site	BnaC01g00120D	44320	44412	+	Yes	Yes	NO	NO	NO	Yes
1001687	Alternative 3’ splice site	BnaC01g00120D	44320	44599	+	NO	NO	NO	NO	Yes	NO
1001688	Alternative 3’ splice site	BnaC01g00120D	44320	44584	+	NO	NO	NO	Yes	NO	NO
1001689	Mutually exclusive exons	BnaA09g51660D	44329	44498	+	Yes	NO	NO	NO	Yes	NO
1001690	Mutually exclusive exons	BnaA09g51660D	44329	44508	+	Yes	NO	NO	NO	Yes	NO
1001691	Alternative 5’ splice site	BnaC04g51850D	44482	44686	+	NO	NO	Yes	NO	NO	NO
1001692	Alternative 5’ splice site	BnaA04g27340D	44502	44602	+	Yes	NO	NO	NO	Yes	NO
1001693	Alternative 5’ splice site	BnaA04g27340D	44535	44602	+	NO	NO	Yes	NO	NO	NO
1001694	Alternative 5’ splice site	BnaC04g51850D	44537	44686	+	NO	NO	NO	Yes	NO	NO
1001695	Alternative 5’ splice site	BnaC04g51850D	44540	44686	+	NO	Yes	NO	NO	NO	NO
1001696	Alternative 5’ splice site	BnaC04g51850D	44545	44686	+	Yes	NO	NO	NO	NO	NO
1001697	Alternative 5’ splice site	BnaA04g27340D	44546	44602	+	NO	NO	NO	Yes	NO	NO
1001698	Alternative 5’ splice site	BnaA04g27340D	44552	44602	+	NO	Yes	NO	NO	NO	Yes
1001699	Alternative 5’ splice site	BnaC04g51850D	44572	44686	+	NO	NO	NO	NO	Yes	Yes
1001700	Alternative 3’ splice site	BnaA09g51660D	44599	45533	+	Yes	NO	NO	Yes	Yes	NO
1001701	Alternative 3’ splice site	BnaA09g51660D	44609	45800	+	NO	Yes	NO	NO	NO	NO
1001702	Alternative 3’ splice site	BnaA09g51660D	44609	45684	+	NO	NO	NO	NO	NO	Yes
1001703	Alternative 3’ splice site	BnaA09g51660D	44609	45774	+	NO	NO	NO	NO	Yes	NO
1001704	Alternative 3’ splice site	BnaA09g51660D	44609	45569	+	NO	NO	Yes	NO	NO	NO
1001705	Alternative 3’ splice site	BnaA09g51660D	44609	45561	+	Yes	NO	NO	NO	NO	NO
1001706	Alternative 3’ splice site	BnaA02g35050D	44702	44742	-	Yes	Yes	Yes	Yes	Yes	Yes
1001707	Alternative 3’ splice site	BnaA01g00140D	44717	45058	-	NO	NO	NO	Yes	NO	NO
1001708	Alternative 5’ splice site	BnaA03g54880D	44726	44862	+	NO	NO	NO	NO	Yes	NO
1001709	Alternative 3’ splice site	BnaA03g54890D	44777	45620	-	NO	NO	NO	NO	Yes	NO
1001710	Alternative 3’ splice site	BnaA01g00140D	44789	45063	-	Yes	Yes	Yes	Yes	Yes	Yes
1001711	Alternative 5’ splice site	BnaA03g54880D	44801	44862	+	Yes	NO	Yes	Yes	NO	Yes
1001712	Alternative 5’ splice site	BnaA10g00100D	44853	45039	-	Yes	Yes	Yes	Yes	Yes	Yes
1001713	Alternative 3’ splice site	BnaA03g54880D	44943	45123	+	Yes	NO	Yes	Yes	NO	Yes
1001714	Alternative 3’ splice site	BnaA03g54880D	44943	45160	+	NO	NO	NO	NO	Yes	NO
1001715	Alternative 3’ splice site	BnaA03g54880D	44962	44969	-	NO	Yes	NO	NO	NO	NO
1001716	Alternative 5’ splice site	BnaA03g54880D	45042	45348	-	NO	Yes	NO	NO	NO	NO
1001717	Alternative 5’ splice site	BnaC02g00170D	45171	45255	+	Yes	Yes	Yes	Yes	Yes	Yes
1001718	Alternative 3’ splice site	BnaA07g36010D	45263	45637	-	NO	NO	NO	NO	NO	Yes
1001719	Alternative 3’ splice site	BnaA07g36010D	45263	45641	-	NO	NO	NO	Yes	NO	NO
1001720	Alternative 3’ splice site	BnaA07g36010D	45268	45641	-	NO	NO	Yes	NO	NO	NO
1001721	Alternative 3’ splice site	BnaA07g36010D	45292	45641	-	NO	Yes	NO	NO	NO	NO
1001722	Alternative 3’ splice site	BnaA07g36010D	45334	45641	-	NO	NO	NO	NO	Yes	NO
1001723	Alternative 3’ splice site	BnaA07g36010D	45340	45637	-	Yes	NO	NO	NO	NO	NO
1001724	Alternative 3’ splice site	BnaA07g36010D	45340	45641	-	Yes	NO	NO	NO	NO	NO
1001725	Intron rentition	BnaA04g27340D	45386	45467	+	NO	NO	Yes	Yes	NO	NO
1001726	Intron rentition	BnaA04g27340D	45386	45467	+	NO	NO	Yes	Yes	NO	NO
1001727	Alternative 3’ splice site	BnaA01g34570D	45423	45562	+	Yes	Yes	Yes	Yes	Yes	Yes
1001728	Alternative 3’ splice site	BnaC09g50880D	45431	45480	+	NO	NO	Yes	NO	NO	NO
1001729	Alternative 5’ splice site	BnaA09g00090D	45454	45774	-	Yes	Yes	Yes	Yes	Yes	Yes
1001730	Alternative 5’ splice site	BnaC09g50890D	45499	45507	+	NO	NO	NO	NO	Yes	NO
1001731	Alternative 5’ splice site	BnaC09g50890D	45506	45507	+	Yes	NO	NO	NO	NO	NO
1001732	Alternative 5’ splice site	BnaA02g35050D	45507	45976	-	Yes	Yes	Yes	Yes	Yes	Yes
1001733	Alternative 3’ splice site	BnaA03g54890D	45540	45620	-	Yes	Yes	Yes	Yes	NO	Yes
1001734	Alternative 3’ splice site	BnaA07g36010D	45552	45637	-	NO	Yes	Yes	Yes	Yes	NO
1001735	Alternative 3’ splice site	BnaA04g00080D	45728	45870	-	Yes	Yes	Yes	Yes	Yes	Yes
1001736	Alternative 3’ splice site	BnaC04g51850D	45805	46125	+	NO	NO	NO	Yes	NO	NO
1001737	Alternative 3’ splice site	BnaC04g51850D	45805	45983	+	NO	Yes	NO	NO	NO	NO
1001738	Alternative 3’ splice site	BnaC04g51850D	45805	46104	+	NO	NO	NO	NO	Yes	Yes
1001739	Alternative 3’ splice site	BnaC04g51850D	45805	46191	+	Yes	NO	NO	NO	NO	NO
1001740	Alternative 3’ splice site	BnaC04g51850D	45805	45977	+	NO	NO	Yes	NO	NO	NO
1001741	Alternative 3’ splice site	BnaC04g00150D	45847	45854	-	NO	Yes	NO	NO	NO	NO
1001742	Alternative 3’ splice site	BnaC04g00150D	45898	46534	-	Yes	Yes	Yes	Yes	Yes	Yes
1001743	Alternative 3’ splice site	BnaC03g71250D	45905	45976	+	Yes	Yes	Yes	Yes	Yes	Yes
1001744	Alternative 3’ splice site	BnaA09g00100D	46001	46315	-	NO	NO	Yes	NO	NO	NO
1001745	Alternative 5’ splice site	BnaA01g00140D	46258	46403	-	Yes	Yes	Yes	Yes	Yes	Yes
1001746	Alternative 5’ splice site	BnaC05g49080D	46421	47346	+	Yes	Yes	Yes	Yes	Yes	Yes
1001747	Alternative 3’ splice site	BnaA09g00100D	46444	46560	-	Yes	Yes	NO	Yes	Yes	Yes
1001748	Alternative 5’ splice site	BnaA04g00080D	46492	46752	-	Yes	Yes	Yes	Yes	Yes	Yes
1001749	Alternative 5’ splice site	BnaA09g51670D	46546	46931	+	NO	NO	NO	NO	NO	Yes
1001750	Alternative 5’ splice site	BnaA09g51670D	46550	46931	+	Yes	NO	NO	NO	NO	NO
1001751	Alternative 5’ splice site	BnaC09g00060D	46557	46634	+	Yes	Yes	Yes	Yes	Yes	Yes
1001752	Alternative 5’ splice site	BnaA09g51670D	46565	46931	+	NO	Yes	NO	NO	Yes	NO
1001753	Alternative 3’ splice site	BnaA05g34260D	46572	46624	+	Yes	Yes	Yes	Yes	Yes	Yes
1001754	Alternative 5’ splice site	BnaA09g51670D	46629	46931	+	NO	NO	Yes	Yes	NO	NO
1001755	Alternative 3’ splice site	BnaC02g44180D	46641	46669	+	Yes	Yes	Yes	Yes	Yes	Yes
1001756	Alternative 5’ splice site	BnaC04g00150D	46766	46944	-	Yes	Yes	Yes	Yes	Yes	Yes
1001757	Intron rentition	BnaC02g00170D	46833	46904	+	NO	NO	NO	NO	NO	Yes
1001758	Intron rentition	BnaC02g00170D	46833	46904	+	NO	NO	NO	NO	NO	Yes
1001759	Alternative 5’ splice site	BnaC05g00130D	46875	46973	+	Yes	Yes	Yes	Yes	Yes	Yes
1001760	Alternative 3’ splice site	BnaA02g35060D	46887	47133	-	Yes	Yes	Yes	Yes	Yes	Yes
1001761	Intron rentition	BnaA09g00100D	46917	46994	-	NO	NO	Yes	NO	NO	NO
1001762	Intron rentition	BnaA09g00100D	46917	46994	-	NO	NO	Yes	NO	NO	NO
1001763	Alternative 3’ splice site	BnaA05g34270D	46939	47259	-	NO	NO	NO	NO	Yes	NO
1001764	Alternative 3’ splice site	BnaA05g34270D	47040	47259	-	NO	Yes	NO	NO	NO	NO
1001765	Alternative 3’ splice site	BnaC02g00170D	47074	47434	+	Yes	Yes	Yes	Yes	Yes	Yes
1001766	Alternative 5’ splice site	BnaA04g00090D	47094	47099	+	Yes	Yes	Yes	Yes	Yes	Yes
1001767	Alternative 3’ splice site	BnaA05g34270D	47107	47259	-	Yes	NO	Yes	Yes	NO	Yes
1001768	Alternative 5’ splice site	BnaA06g37510D	47334	47695	+	Yes	NO	NO	Yes	NO	NO
1001769	Alternative 5’ splice site	BnaA06g37510D	47334	47692	+	Yes	NO	NO	Yes	NO	NO
1001770	Alternative 5’ splice site	BnaA06g37510D	47337	47692	+	NO	Yes	Yes	NO	Yes	Yes
1001771	Alternative 5’ splice site	BnaA06g37510D	47337	47695	+	NO	Yes	Yes	NO	Yes	Yes
1001772	Alternative 3’ splice site	BnaA06g00110D	47352	47469	-	Yes	Yes	Yes	Yes	Yes	Yes
1001773	Alternative 5’ splice site	BnaC01g00130D	47356	47502	+	Yes	Yes	Yes	Yes	Yes	Yes
1001774	Intron rentition	BnaA05g34270D	47444	47526	-	NO	NO	NO	NO	Yes	NO
1001775	Intron rentition	BnaA05g34270D	47444	47526	-	NO	NO	NO	NO	Yes	NO
1001776	Alternative 3’ splice site	BnaC05g49080D	47473	47563	+	Yes	Yes	Yes	Yes	Yes	Yes
1001777	Alternative 3’ splice site	BnaC02g00180D	47490	47612	-	Yes	Yes	Yes	Yes	Yes	Yes
1001778	Alternative 5’ splice site	BnaC04g00160D	47513	47880	+	Yes	Yes	Yes	Yes	Yes	Yes
1001779	Alternative 5’ splice site	BnaA07g36010D	47600	47754	-	Yes	Yes	Yes	Yes	Yes	Yes
1001780	Alternative 3’ splice site	BnaC09g00060D	47835	47972	+	Yes	Yes	Yes	Yes	Yes	Yes
1001781	Alternative 5’ splice site	BnaC01g40700D	47975	48027	+	Yes	NO	Yes	NO	NO	NO
1001782	Alternative 5’ splice site	BnaC01g40700D	48000	48027	+	NO	Yes	NO	Yes	NO	NO
1001783	Alternative 5’ splice site	BnaC01g40700D	48003	48027	+	NO	NO	NO	NO	NO	Yes
1001784	Intron rentition	BnaA04g27340D	48004	48085	+	NO	NO	NO	NO	Yes	NO
1001785	Intron rentition	BnaA04g27340D	48004	48085	+	NO	NO	NO	NO	Yes	NO
1001786	Alternative 3’ splice site	BnaC01g00130D	48013	48098	+	Yes	Yes	Yes	Yes	Yes	Yes
1001787	Intron rentition	BnaA09g51670D	48021	48090	+	NO	NO	NO	NO	NO	Yes
1001788	Intron rentition	BnaA09g51670D	48021	48090	+	NO	NO	NO	NO	NO	Yes
1001789	Alternative 3’ splice site	BnaA01g00150D	48079	48287	-	Yes	Yes	Yes	Yes	Yes	Yes
1001790	Alternative 3’ splice site	BnaA07g00070D	48154	48567	-	Yes	Yes	Yes	Yes	Yes	Yes
1001791	Alternative 5’ splice site	BnaA03g54890D	48159	48352	-	Yes	Yes	Yes	Yes	Yes	Yes
1001792	Intron rentition	BnaA09g51670D	48170	48250	+	Yes	NO	NO	NO	Yes	NO
1001793	Intron rentition	BnaA09g51670D	48170	48250	+	Yes	NO	NO	NO	Yes	NO
1001794	Alternative 3’ splice site	BnaC09g00070D	48187	48345	-	Yes	Yes	Yes	Yes	Yes	Yes
1001795	Alternative 3’ splice site	BnaA04g00090D	48218	48527	+	Yes	Yes	Yes	Yes	Yes	Yes
1001796	Alternative 3’ splice site	BnaA01g34580D	48324	49255	-	Yes	NO	NO	NO	NO	NO
1001797	Alternative 5’ splice site	BnaA06g00110D	48327	48500	-	Yes	Yes	Yes	Yes	Yes	Yes
1001798	Alternative 3’ splice site	BnaA01g34580D	48404	49255	-	NO	Yes	Yes	Yes	Yes	Yes
1001799	Alternative 3’ splice site	BnaC04g00160D	48555	48867	+	Yes	Yes	Yes	Yes	Yes	Yes
1001800	Alternative 3’ splice site	BnaA03g54900D	48584	48813	-	NO	NO	NO	Yes	Yes	NO
1001801	Alternative 3’ splice site	BnaA03g54900D	48599	48813	-	NO	NO	NO	NO	NO	Yes
1001802	Alternative 5’ splice site	BnaC09g50890D	48603	48722	+	Yes	Yes	Yes	Yes	Yes	Yes
1001803	Alternative 3’ splice site	BnaA03g54900D	48604	48813	-	NO	NO	Yes	NO	NO	NO
1001804	Alternative 3’ splice site	BnaA03g54900D	48606	48813	-	Yes	NO	NO	NO	NO	NO
1001805	Alternative 5’ splice site	BnaC05g49090D	48651	48786	+	Yes	Yes	Yes	Yes	Yes	Yes
1001806	Alternative 3’ splice site	BnaA03g54900D	48660	48813	-	NO	Yes	NO	NO	NO	NO
1001807	Alternative 5’ splice site	BnaC01g40700D	48678	48743	+	NO	NO	NO	NO	Yes	NO
1001808	Alternative 5’ splice site	BnaC01g40700D	48678	49017	+	Yes	NO	NO	NO	NO	NO
1001809	Alternative 3’ splice site	BnaC01g00140D	48704	49194	-	NO	NO	NO	Yes	NO	NO
1001810	Intron rentition	BnaA09g51670D	48717	48808	+	NO	Yes	NO	NO	NO	NO
1001811	Intron rentition	BnaA09g51670D	48717	48808	+	NO	Yes	NO	NO	NO	NO
1001812	Intron rentition	BnaC01g40700D	48743	48841	+	NO	NO	Yes	NO	NO	NO
1001813	Intron rentition	BnaC01g40700D	48743	48841	+	NO	NO	Yes	NO	NO	NO
1001814	Alternative 3’ splice site	BnaC01g00140D	48751	49194	-	NO	NO	Yes	NO	NO	Yes
1001815	Alternative 3’ splice site	BnaC01g00140D	48757	49194	-	Yes	NO	NO	NO	NO	NO
1001816	Alternative 3’ splice site	BnaC01g00140D	48757	49204	-	Yes	NO	NO	NO	NO	NO
1001817	Alternative 3’ splice site	BnaC01g00140D	48780	49194	-	NO	NO	NO	NO	Yes	NO
1001818	Alternative 3’ splice site	BnaC01g00140D	48783	49194	-	NO	Yes	NO	NO	NO	NO
1001819	Alternative 3’ splice site	BnaC01g00140D	48783	49204	-	NO	Yes	NO	NO	NO	NO
1001820	Alternative 5’ splice site	BnaA09g00100D	48815	49048	-	Yes	Yes	Yes	Yes	Yes	Yes
1001821	Alternative 3’ splice site	BnaC01g00140D	48847	49063	-	Yes	Yes	Yes	Yes	Yes	Yes
1001822	Alternative 5’ splice site	BnaA06g00120D	48872	49238	+	NO	NO	NO	NO	NO	Yes
1001823	Alternative 5’ splice site	BnaA06g00120D	48941	49238	+	Yes	Yes	Yes	Yes	Yes	NO
1001824	Alternative 5’ splice site	BnaC04g00170D	48988	49375	+	Yes	Yes	Yes	Yes	Yes	Yes
1001825	Alternative 5’ splice site	BnaA05g34270D	49082	49914	-	Yes	Yes	Yes	Yes	Yes	Yes
1001826	Alternative 3’ splice site	BnaA09g51670D	49085	49119	+	NO	NO	NO	NO	NO	Yes
1001827	Alternative 3’ splice site	BnaA09g51670D	49085	49195	+	NO	NO	Yes	Yes	NO	NO
1001828	Alternative 3’ splice site	BnaA09g51670D	49085	49172	+	Yes	NO	NO	NO	NO	NO
1001829	Alternative 3’ splice site	BnaA09g51670D	49085	49175	+	NO	NO	NO	NO	Yes	NO
1001830	Alternative 3’ splice site	BnaA09g51670D	49085	49177	+	NO	Yes	NO	NO	NO	NO
1001831	Intron rentition	BnaA07g00070D	49087	49167	-	NO	NO	Yes	NO	NO	NO
1001832	Intron rentition	BnaA07g00070D	49087	49167	-	NO	NO	Yes	NO	NO	NO
1001833	Intron rentition	BnaA03g54900D	49134	49221	-	NO	NO	Yes	NO	NO	NO
1001834	Intron rentition	BnaA03g54900D	49134	49221	-	NO	NO	Yes	NO	NO	NO
1001835	Alternative 5’ splice site	BnaC08g00120D	49138	49975	+	NO	Yes	NO	NO	NO	NO
1001836	Alternative 5’ splice site	BnaC08g00120D	49147	49975	+	NO	NO	NO	Yes	NO	NO
1001837	Alternative 5’ splice site	BnaC08g00120D	49306	49975	+	NO	NO	NO	NO	NO	Yes
1001838	Alternative 3’ splice site	BnaA06g37510D	49315	49587	+	Yes	NO	NO	NO	NO	NO
1001839	Alternative 3’ splice site	BnaA06g37510D	49315	49484	+	NO	NO	Yes	NO	NO	NO
1001840	Alternative 3’ splice site	BnaA06g37510D	49315	49818	+	NO	NO	NO	NO	NO	Yes
1001841	Alternative 3’ splice site	BnaA06g37510D	49315	49350	+	NO	NO	NO	Yes	NO	NO
1001842	Alternative 3’ splice site	BnaA06g37510D	49315	49562	+	NO	Yes	NO	NO	NO	NO
1001843	Alternative 3’ splice site	BnaA06g37510D	49315	50010	+	NO	NO	NO	NO	Yes	NO
1001844	Alternative 5’ splice site	BnaC09g00070D	49388	49450	-	Yes	Yes	Yes	Yes	Yes	Yes
1001845	Mutually exclusive exons	BnaA04g27340D	49392	49568	+	Yes	Yes	Yes	Yes	Yes	NO
1001846	Mutually exclusive exons	BnaA04g27340D	49392	49482	+	Yes	Yes	Yes	Yes	Yes	NO
1001847	Alternative 5’ splice site	BnaA08g00070D	49498	49900	+	NO	NO	NO	NO	Yes	NO
1001848	Alternative 5’ splice site	BnaA08g00070D	49516	49900	+	NO	NO	NO	Yes	NO	NO
1001849	Alternative 3’ splice site	BnaA09g51680D	49517	49870	-	Yes	Yes	Yes	Yes	Yes	Yes
1001850	Alternative 5’ splice site	BnaA02g35060D	49568	49715	-	Yes	Yes	Yes	Yes	Yes	Yes
1001851	Alternative 5’ splice site	BnaUnng00080D	49622	49776	+	NO	NO	NO	NO	Yes	NO
1001852	Cassette exon	BnaC01g00140D	49623	49755	-	Yes	Yes	NO	NO	NO	NO
1001853	Alternative 3’ splice site	BnaC01g40700D	49623	49904	+	NO	NO	NO	NO	Yes	NO
1001854	Alternative 3’ splice site	BnaC01g40700D	49623	49679	+	NO	NO	NO	Yes	NO	NO
1001855	Alternative 3’ splice site	BnaC01g40700D	49623	49673	+	NO	Yes	NO	NO	NO	NO
1001856	Alternative 3’ splice site	BnaC01g40700D	49623	50143	+	Yes	NO	NO	NO	NO	NO
1001857	Cassette exon	BnaC01g00140D	49623	49755	-	Yes	Yes	Yes	Yes	Yes	Yes
1001858	Alternative 3’ splice site	BnaC01g40700D	49623	49674	+	NO	NO	Yes	NO	NO	NO
1001859	Cassette exon	BnaC01g00140D	49623	49755	-	Yes	Yes	Yes	Yes	Yes	Yes
1001860	Alternative 3’ splice site	BnaC01g40700D	49623	50062	+	NO	NO	NO	NO	NO	Yes
1001861	Alternative 5’ splice site	BnaUnng00080D	49646	49776	+	NO	NO	NO	Yes	NO	NO
1001862	Alternative 5’ splice site	BnaUnng00080D	49648	49776	+	NO	Yes	NO	NO	NO	Yes
1001863	Alternative 3’ splice site	BnaA04g27340D	49650	49792	+	Yes	Yes	Yes	Yes	Yes	Yes
1001864	Alternative 5’ splice site	BnaUnng00080D	49650	49776	+	Yes	NO	Yes	NO	NO	NO
1001865	Alternative 3’ splice site	BnaA04g27340D	49693	49792	+	NO	NO	Yes	NO	NO	NO
1001866	Alternative 3’ splice site	BnaA04g27340D	49693	49892	+	NO	Yes	NO	NO	NO	NO
1001867	Alternative 3’ splice site	BnaA04g27340D	49693	50037	+	NO	NO	NO	NO	Yes	NO
1001868	Alternative 3’ splice site	BnaA04g27340D	49693	49925	+	NO	NO	NO	Yes	NO	NO
1001869	Alternative 3’ splice site	BnaA04g27340D	49693	50196	+	Yes	NO	NO	NO	NO	NO
1001870	Alternative 5’ splice site	BnaA08g00070D	49783	49900	+	Yes	Yes	Yes	NO	NO	Yes
1001871	Alternative 5’ splice site	BnaA02g35070D	49869	50862	+	NO	NO	NO	NO	NO	Yes
1001872	Alternative 5’ splice site	BnaA02g35070D	49929	50862	+	Yes	NO	NO	NO	NO	NO
1001873	Alternative 5’ splice site	BnaA02g35070D	49936	50862	+	NO	Yes	NO	NO	NO	NO
1001874	Alternative 5’ splice site	BnaA02g35070D	49942	50862	+	NO	NO	NO	Yes	NO	NO
1001875	Alternative 5’ splice site	BnaA02g35070D	49943	50862	+	NO	NO	Yes	NO	NO	NO
1001876	Alternative 5’ splice site	BnaA02g35070D	49948	50490	+	Yes	Yes	Yes	Yes	Yes	Yes
1001877	Mutually exclusive exons	BnaA01g34580D	50160	50307	-	Yes	NO	NO	NO	NO	NO
1001878	Mutually exclusive exons	BnaA01g34580D	50160	50295	-	Yes	NO	NO	NO	NO	NO
1001879	Alternative 5’ splice site	BnaA10g00110D	50243	50360	+	NO	Yes	NO	NO	NO	NO
1001880	Alternative 5’ splice site	BnaA10g00110D	50252	51248	+	NO	NO	NO	NO	Yes	NO
1001881	Alternative 5’ splice site	BnaA10g00110D	50266	51248	+	NO	NO	Yes	NO	NO	NO
1001882	Alternative 5’ splice site	BnaA10g00110D	50271	50360	+	NO	NO	NO	Yes	NO	NO
1001883	Alternative 5’ splice site	BnaA10g00110D	50294	50360	+	NO	NO	Yes	NO	NO	NO
1001884	Alternative 5’ splice site	BnaA10g00110D	50296	51248	+	NO	Yes	NO	NO	NO	NO
1001885	Alternative 5’ splice site	BnaA10g00110D	50310	50360	+	Yes	NO	NO	NO	NO	NO
1001886	Alternative 5’ splice site	BnaA10g00110D	50336	51248	+	NO	NO	NO	Yes	NO	NO
1001887	Alternative 5’ splice site	BnaC02g00180D	50428	51141	-	Yes	Yes	Yes	Yes	Yes	Yes
1001888	Alternative 5’ splice site	BnaA10g00110D	50433	51248	+	Yes	NO	NO	NO	NO	NO
1001889	Alternative 5’ splice site	BnaA10g00110D	50499	51248	+	NO	NO	NO	NO	NO	Yes
1001890	Alternative 5’ splice site	BnaA10g00110D	50557	51050	+	Yes	Yes	Yes	Yes	Yes	Yes
1001891	Alternative 3’ splice site	BnaA06g00120D	50562	51477	+	NO	NO	NO	NO	NO	Yes
1001892	Alternative 3’ splice site	BnaA06g00120D	50562	51265	+	Yes	Yes	Yes	Yes	Yes	NO
1001893	Alternative 5’ splice site	BnaC01g40710D	50606	50651	+	Yes	Yes	Yes	Yes	Yes	Yes
1001894	Alternative 3’ splice site	BnaC04g00170D	50800	51349	+	Yes	Yes	Yes	Yes	Yes	Yes
1001895	Alternative 3’ splice site	BnaA05g34280D	50867	50916	-	Yes	Yes	Yes	Yes	Yes	Yes
1001896	Alternative 3’ splice site	BnaC05g49090D	50871	50995	+	Yes	Yes	Yes	Yes	Yes	Yes
1001897	Alternative 5’ splice site	BnaA09g51680D	50881	51057	-	Yes	Yes	Yes	Yes	Yes	Yes
1001898	Alternative 5’ splice site	BnaA06g37520D	51019	51538	+	NO	NO	NO	Yes	NO	NO
1001899	Alternative 5’ splice site	BnaC01g00140D	51019	51204	-	Yes	Yes	Yes	Yes	Yes	Yes
1001900	Intron rentition	BnaA10g00110D	51050	51099	+	Yes	Yes	Yes	Yes	NO	NO
1001901	Intron rentition	BnaA10g00110D	51050	51099	+	Yes	Yes	Yes	Yes	NO	NO
1001902	Alternative 3’ splice site	BnaUnng00080D	51080	51371	+	NO	NO	NO	NO	NO	Yes
1001903	Alternative 5’ splice site	BnaA06g37520D	51080	51192	+	NO	NO	NO	NO	NO	Yes
1001904	Alternative 3’ splice site	BnaUnng00080D	51080	51403	+	NO	NO	NO	Yes	NO	NO
1001905	Alternative 3’ splice site	BnaUnng00080D	51080	51265	+	NO	NO	Yes	NO	NO	NO
1001906	Alternative 3’ splice site	BnaUnng00080D	51080	51430	+	NO	Yes	NO	NO	NO	NO
1001907	Alternative 3’ splice site	BnaUnng00080D	51080	51463	+	Yes	NO	NO	NO	NO	NO
1001908	Alternative 3’ splice site	BnaUnng00080D	51080	51372	+	NO	NO	NO	NO	Yes	NO
1001909	Alternative 5’ splice site	BnaA05g34280D	51130	51323	-	Yes	Yes	Yes	Yes	Yes	Yes
1001910	Alternative 5’ splice site	BnaA01g00150D	51160	51257	-	Yes	Yes	Yes	Yes	Yes	Yes
1001911	Alternative 5’ splice site	BnaA06g37520D	51181	51538	+	NO	Yes	NO	NO	NO	NO
1001912	Alternative 5’ splice site	BnaA06g37520D	51310	51538	+	Yes	NO	NO	NO	NO	NO
1001913	Alternative 5’ splice site	BnaA06g37520D	51310	52977	+	Yes	NO	NO	NO	NO	NO
1001914	Mutually exclusive exons	BnaA06g37520D	51313	51538	+	NO	NO	NO	NO	NO	Yes
1001915	Mutually exclusive exons	BnaA06g37520D	51313	52977	+	NO	NO	NO	NO	NO	Yes
1001916	Alternative 3’ splice site	BnaA06g00130D	51315	52193	-	NO	NO	Yes	NO	NO	NO
1001917	Alternative 5’ splice site	BnaA06g37520D	51341	51538	+	NO	NO	Yes	NO	Yes	Yes
1001918	Alternative 3’ splice site	BnaA06g00130D	51356	52193	-	Yes	Yes	NO	Yes	Yes	Yes
1001919	Alternative 3’ splice site	BnaC04g00180D	51398	51758	-	Yes	Yes	Yes	Yes	Yes	Yes
1001920	Alternative 3’ splice site	BnaC01g40710D	51464	51502	+	Yes	Yes	Yes	Yes	Yes	Yes
1001921	Intron rentition	BnaA06g37520D	51538	52639	+	NO	NO	NO	NO	NO	Yes
1001922	Intron rentition	BnaA06g37520D	51538	52920	+	NO	NO	NO	NO	NO	Yes
1001923	Intron rentition	BnaA06g37520D	51538	52639	+	NO	NO	NO	NO	NO	Yes
1001924	Intron rentition	BnaA06g37520D	51538	52744	+	NO	NO	NO	NO	NO	Yes
1001925	Intron rentition	BnaA06g37520D	51538	52744	+	NO	NO	NO	NO	NO	Yes
1001926	Intron rentition	BnaA06g37520D	51538	52920	+	NO	NO	NO	NO	NO	Yes
1001927	Alternative 3’ splice site	BnaA09g51690D	51541	51651	-	NO	NO	NO	Yes	Yes	Yes
1001928	Alternative 3’ splice site	BnaA09g51690D	51546	51651	-	Yes	Yes	Yes	NO	NO	NO
1001929	Alternative 3’ splice site	BnaC04g51860D	51684	52336	-	NO	NO	NO	NO	Yes	NO
1001930	Mutually exclusive exons	BnaA09g51690D	51882	51984	-	Yes	Yes	Yes	Yes	Yes	Yes
1001931	Mutually exclusive exons	BnaA09g51690D	51882	51994	-	Yes	Yes	Yes	Yes	Yes	Yes
1001932	Alternative 3’ splice site	BnaA04g27350D	51910	52415	-	NO	NO	NO	Yes	NO	NO
1001933	Alternative 3’ splice site	BnaA04g27350D	51912	52415	-	NO	NO	NO	NO	NO	Yes
1001934	Alternative 3’ splice site	BnaUnng00090D	51924	52008	-	NO	NO	NO	NO	Yes	NO
1001935	Alternative 3’ splice site	BnaA04g27350D	51924	52415	-	NO	Yes	NO	NO	NO	NO
1001936	Alternative 3’ splice site	BnaC04g51860D	51930	52336	-	NO	NO	NO	NO	NO	Yes
1001937	Alternative 3’ splice site	BnaA04g27350D	51940	52415	-	NO	NO	NO	NO	Yes	NO
1001938	Alternative 3’ splice site	BnaA04g27350D	51941	52415	-	NO	NO	Yes	NO	NO	NO
1001939	Alternative 3’ splice site	BnaC04g51860D	51958	52336	-	Yes	NO	NO	NO	NO	NO
1001940	Alternative 5’ splice site	BnaA06g37520D	51972	52977	+	NO	NO	NO	Yes	NO	NO
1001941	Alternative 3’ splice site	BnaA10g00110D	52000	52163	+	NO	NO	NO	Yes	NO	NO
1001942	Alternative 3’ splice site	BnaA10g00110D	52000	52109	+	NO	Yes	Yes	NO	NO	NO
1001943	Alternative 3’ splice site	BnaA10g00110D	52000	52117	+	NO	NO	NO	NO	Yes	NO
1001944	Alternative 3’ splice site	BnaA10g00110D	52000	52337	+	NO	NO	NO	NO	NO	Yes
1001945	Alternative 3’ splice site	BnaA10g00110D	52001	52259	+	Yes	NO	NO	NO	NO	NO
1001946	Alternative 3’ splice site	BnaC04g51860D	52034	52336	-	NO	NO	Yes	NO	NO	NO
1001947	Alternative 3’ splice site	BnaC04g51860D	52039	52336	-	NO	Yes	NO	Yes	NO	NO
1001948	Mutually exclusive exons	BnaA07g00070D	52138	52197	-	NO	NO	NO	NO	NO	Yes
1001949	Mutually exclusive exons	BnaA07g00070D	52138	52235	-	NO	NO	NO	NO	NO	Yes
1001950	Alternative 5’ splice site	BnaA06g37520D	52139	52977	+	NO	NO	Yes	NO	NO	NO
1001951	Alternative 3’ splice site	BnaA04g27350D	52215	52415	-	Yes	NO	NO	NO	NO	NO
1001952	Alternative 5’ splice site	BnaA01g34580D	52286	52297	-	Yes	Yes	Yes	Yes	Yes	Yes
1001953	Alternative 5’ splice site	BnaC04g00180D	52314	52499	-	Yes	Yes	Yes	Yes	Yes	Yes
1001954	Alternative 5’ splice site	BnaC01g00150D	52394	52537	+	Yes	Yes	Yes	Yes	Yes	Yes
1001955	Alternative 3’ splice site	BnaA03g00160D	52586	53417	-	Yes	NO	NO	NO	NO	NO
1001956	Alternative 3’ splice site	BnaA03g00160D	52586	53391	-	Yes	NO	NO	NO	NO	NO
1001957	Alternative 5’ splice site	BnaA04g00100D	52632	52928	+	NO	Yes	NO	NO	NO	Yes
1001958	Alternative 5’ splice site	BnaA04g00100D	52670	52928	+	NO	NO	NO	Yes	NO	NO
1001959	Alternative 5’ splice site	BnaC04g00190D	52675	53026	+	NO	NO	NO	Yes	NO	NO
1001960	Alternative 5’ splice site	BnaA04g00100D	52711	52928	+	Yes	NO	Yes	NO	Yes	NO
1001961	Alternative 3’ splice site	BnaC05g00130D	52716	52798	+	Yes	Yes	Yes	Yes	Yes	Yes
1001962	Alternative 5’ splice site	BnaC04g00190D	52734	53026	+	NO	NO	NO	NO	Yes	NO
1001963	Alternative 5’ splice site	BnaC05g00140D	52735	52984	+	NO	NO	Yes	NO	NO	NO
1001964	Alternative 5’ splice site	BnaC05g00140D	52740	52984	+	NO	Yes	NO	NO	NO	Yes
1001965	Alternative 5’ splice site	BnaC04g00190D	52750	53026	+	NO	Yes	NO	NO	NO	NO
1001966	Alternative 5’ splice site	BnaC05g00140D	52751	52984	+	Yes	NO	NO	Yes	NO	NO
1001967	Alternative 5’ splice site	BnaC05g00140D	52752	52984	+	NO	NO	NO	NO	Yes	NO
1001968	Intron rentition	BnaA06g37520D	52767	52920	+	Yes	Yes	NO	Yes	NO	Yes
1001969	Intron rentition	BnaA06g37520D	52767	52920	+	Yes	Yes	NO	Yes	NO	Yes
1001970	Alternative 3’ splice site	BnaA03g00160D	52772	53417	-	NO	Yes	Yes	Yes	Yes	Yes
1001971	Alternative 5’ splice site	BnaA09g51690D	52796	52903	-	Yes	Yes	Yes	Yes	Yes	Yes
1001972	Alternative 5’ splice site	BnaC04g00190D	52813	53026	+	NO	NO	Yes	NO	NO	NO
1001973	Alternative 5’ splice site	BnaC04g00190D	52831	53026	+	NO	NO	NO	NO	NO	Yes
1001974	Alternative 5’ splice site	BnaC04g00190D	52870	53026	+	Yes	NO	NO	NO	NO	NO
1001975	Alternative 5’ splice site	BnaC09g00090D	52967	53308	+	Yes	Yes	Yes	Yes	Yes	Yes
1001976	Alternative 3’ splice site	BnaA02g35070D	53032	53158	+	Yes	NO	NO	NO	NO	NO
1001977	Alternative 3’ splice site	BnaA02g35070D	53032	53282	+	NO	NO	NO	Yes	NO	NO
1001978	Alternative 3’ splice site	BnaA02g35070D	53032	53130	+	NO	NO	NO	NO	Yes	NO
1001979	Alternative 3’ splice site	BnaA02g35070D	53032	53284	+	NO	NO	Yes	NO	NO	NO
1001980	Alternative 3’ splice site	BnaA02g35070D	53032	53162	+	NO	Yes	NO	NO	NO	NO
1001981	Alternative 3’ splice site	BnaA02g35070D	53032	53313	+	NO	NO	NO	NO	NO	Yes
1001982	Intron rentition	BnaC01g00150D	53039	53112	+	Yes	NO	NO	Yes	NO	NO
1001983	Intron rentition	BnaC01g00150D	53039	53112	+	Yes	NO	NO	Yes	NO	NO
1001984	Mutually exclusive exons	BnaA06g00130D	53067	53349	-	NO	NO	Yes	NO	Yes	NO
1001985	Mutually exclusive exons	BnaA06g00130D	53067	53368	-	NO	NO	Yes	NO	Yes	NO
1001986	Alternative 3’ splice site	BnaC09g50890D	53105	53625	+	Yes	Yes	Yes	Yes	Yes	Yes
1001987	Alternative 3’ splice site	BnaC09g50880D	53105	53625	+	Yes	Yes	NO	Yes	Yes	Yes
1001988	Alternative 3’ splice site	BnaA06g37520D	53166	53540	+	NO	Yes	NO	NO	NO	Yes
1001989	Alternative 3’ splice site	BnaA06g37520D	53166	53537	+	Yes	NO	Yes	Yes	Yes	NO
1001990	Alternative 5’ splice site	BnaC08g00120D	53183	53294	+	NO	NO	NO	NO	NO	Yes
1001991	Mutually exclusive exons	BnaC08g00120D	53194	53294	+	Yes	Yes	Yes	NO	Yes	Yes
1001992	Mutually exclusive exons	BnaC08g00120D	53194	53324	+	Yes	Yes	Yes	NO	Yes	Yes
1001993	Intron rentition	BnaA04g27350D	53198	53280	-	NO	NO	NO	NO	NO	Yes
1001994	Intron rentition	BnaA04g27350D	53198	53280	-	NO	NO	NO	NO	NO	Yes
1001995	Alternative 5’ splice site	BnaA02g35080D	53206	53250	+	Yes	Yes	Yes	Yes	Yes	Yes
1001996	Alternative 3’ splice site	BnaA01g34600D	53406	53427	-	Yes	Yes	Yes	Yes	Yes	Yes
1001997	Alternative 5’ splice site	BnaA06g00130D	53459	54133	-	NO	NO	NO	NO	Yes	NO
1001998	Alternative 5’ splice site	BnaA07g00070D	53462	53991	-	NO	NO	NO	NO	NO	Yes
[truncated: 482,549+ more rows]
